# Supplementary material for: Rad53 checkpoint kinase regulation of DNA replication fork rate via Mrc1 phosphorylation
Source: eLife journal article supplement (doi:10.7554/elife.69726), 2021-08-13

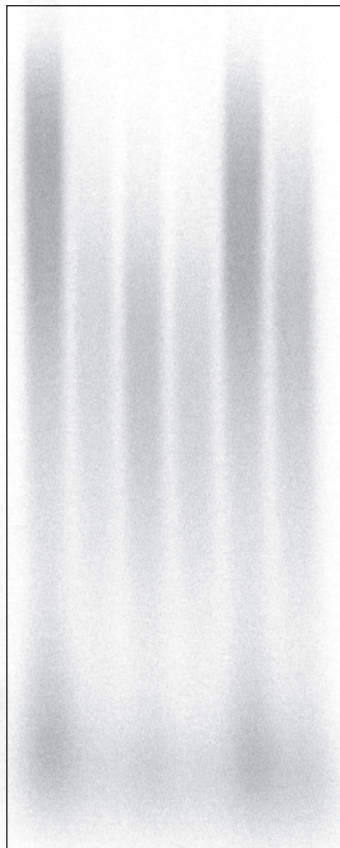

cropped area for Figure 6A

---

Figure 6 - source data 1.pdf  
2500 x 2000

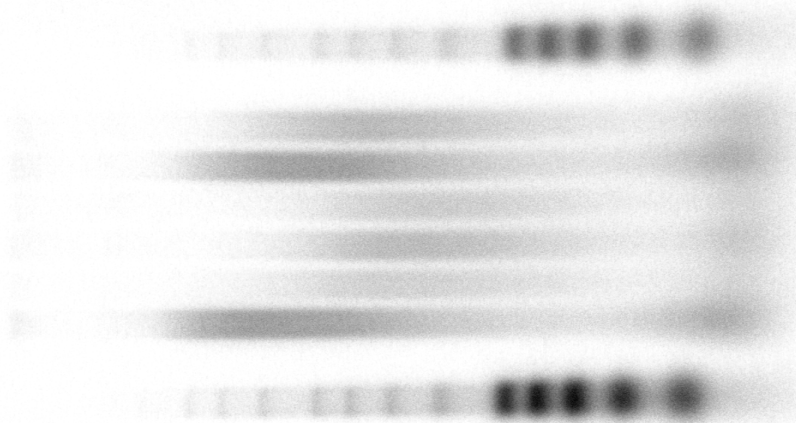

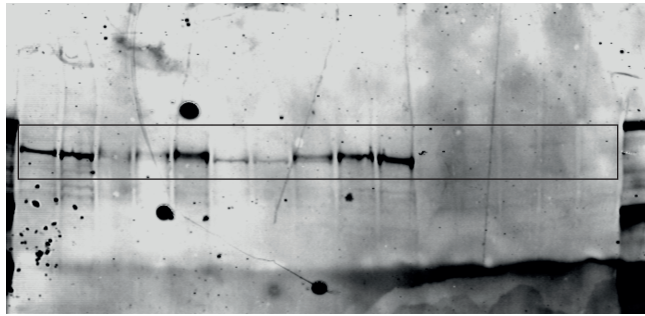

cropped area for Figure 6B (flag)

---

Figure 6 - source data 2.pdf

2005 x 968

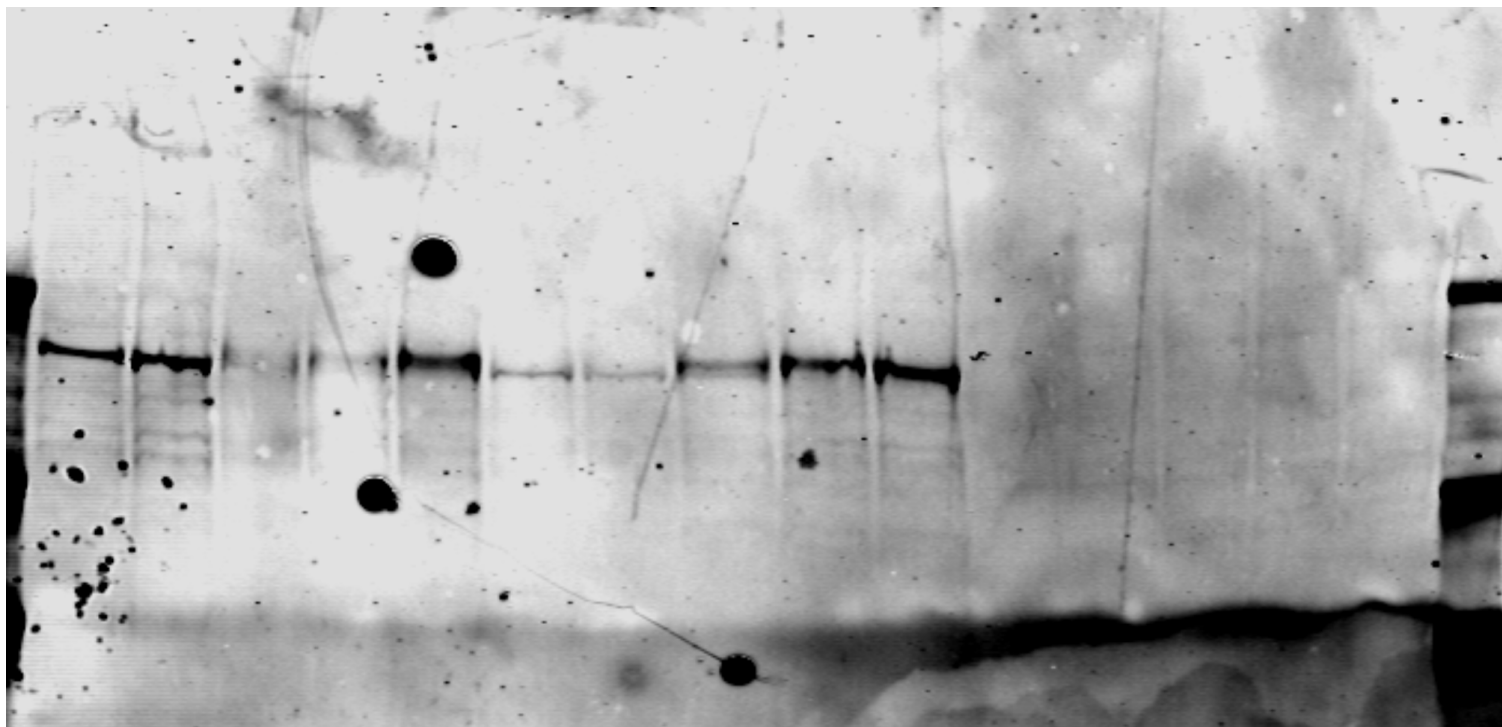

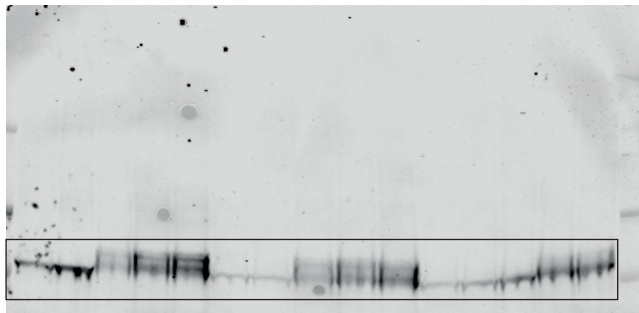

cropped area for Figure 6B (Rad53)

---

Figure 6 - source data 3.pdf  
2005 x 968

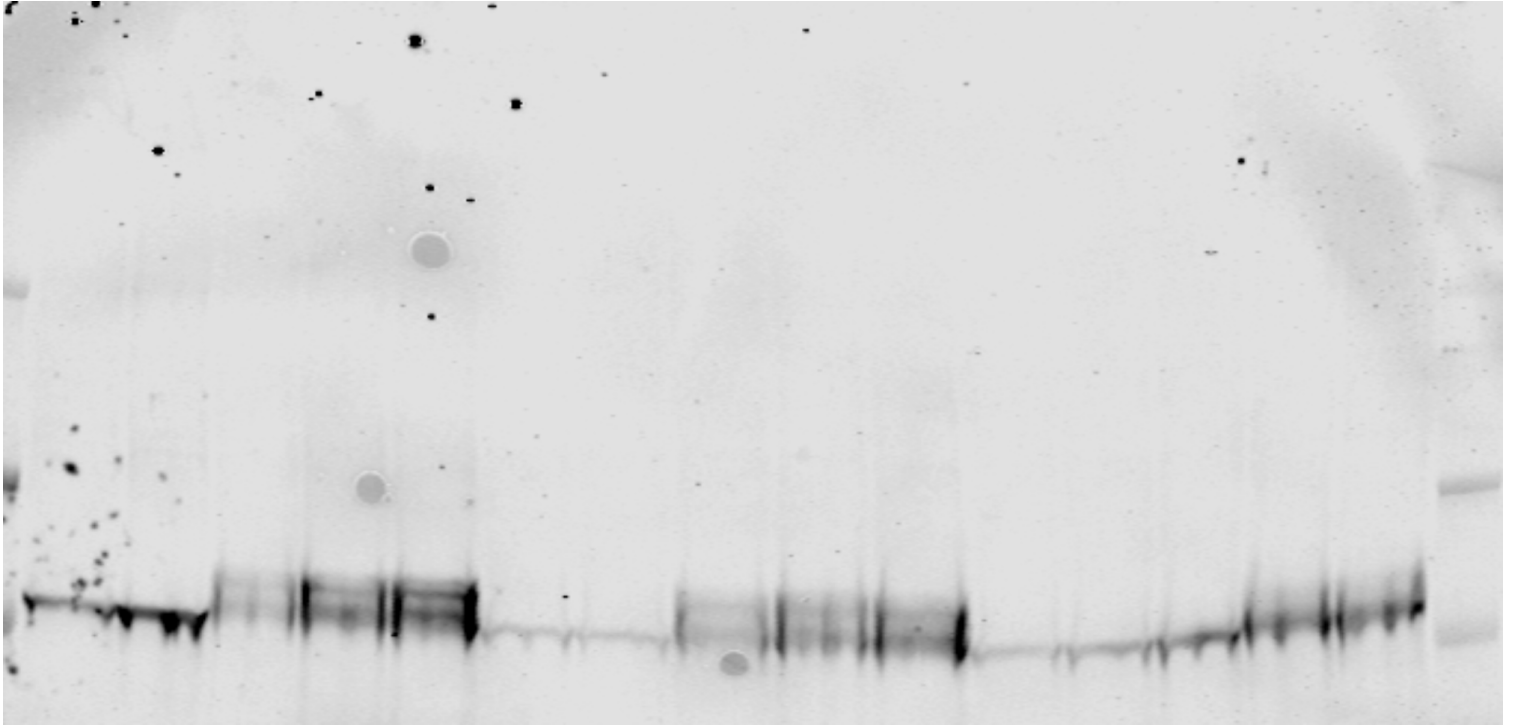

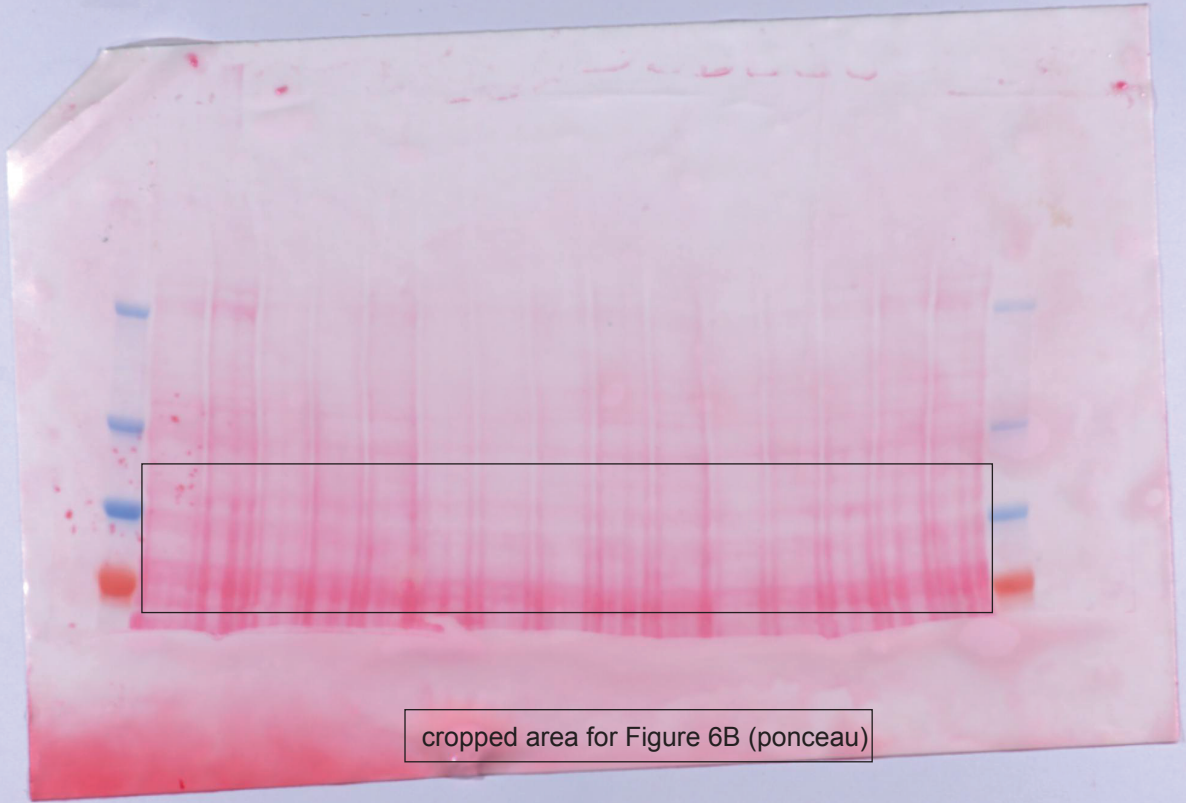

cropped area for Figure 6B (ponceau)

---

Figure 6 - source data 4.pdf  
2048 x 2816



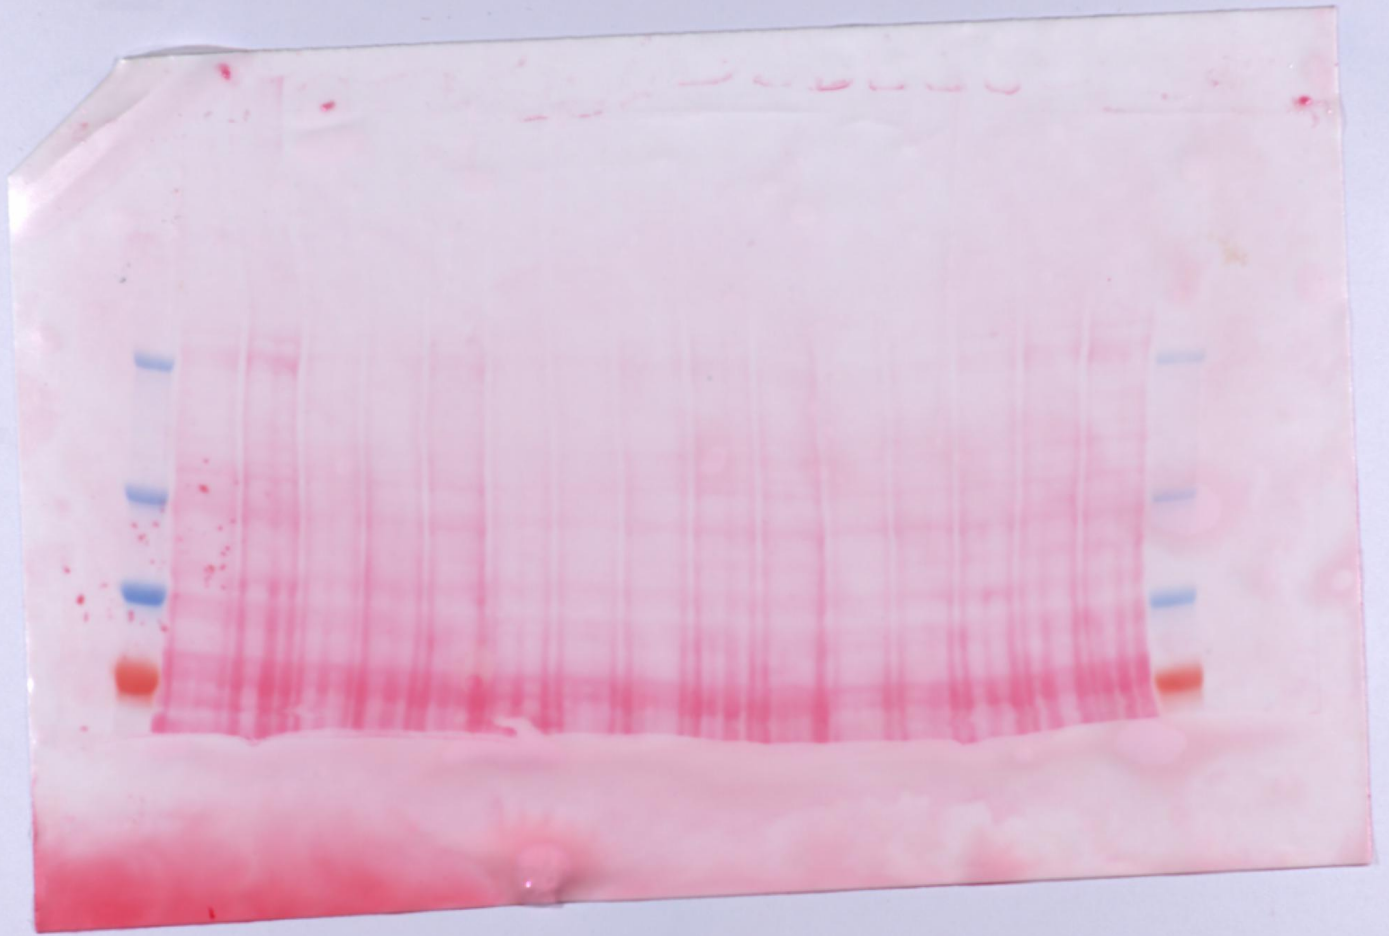

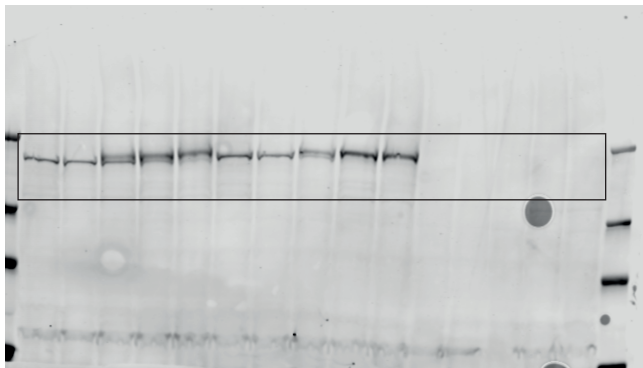

cropped area for Figure 6C (flag)

---

Figure 6 - source data 5.pdf  
2005 x 1136

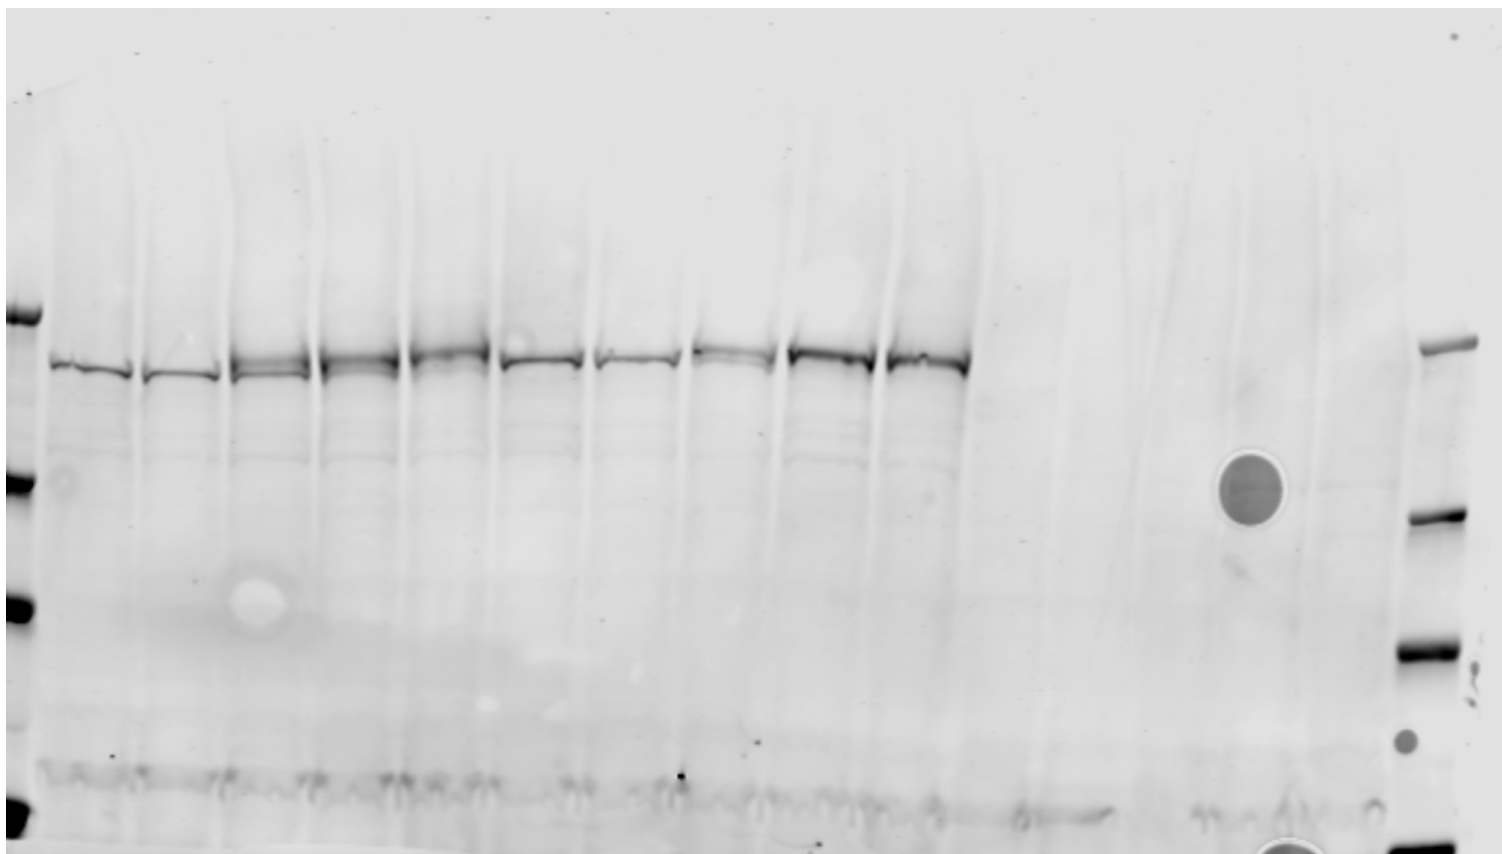

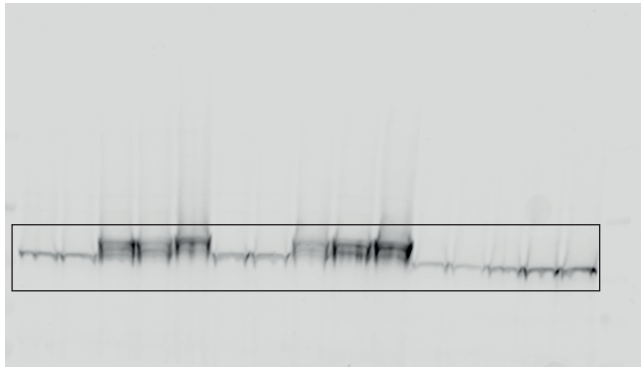

cropped area for Figure 6C (Rad53)

---

Figure 6 - source data 6.pdf  
2005 x 1136

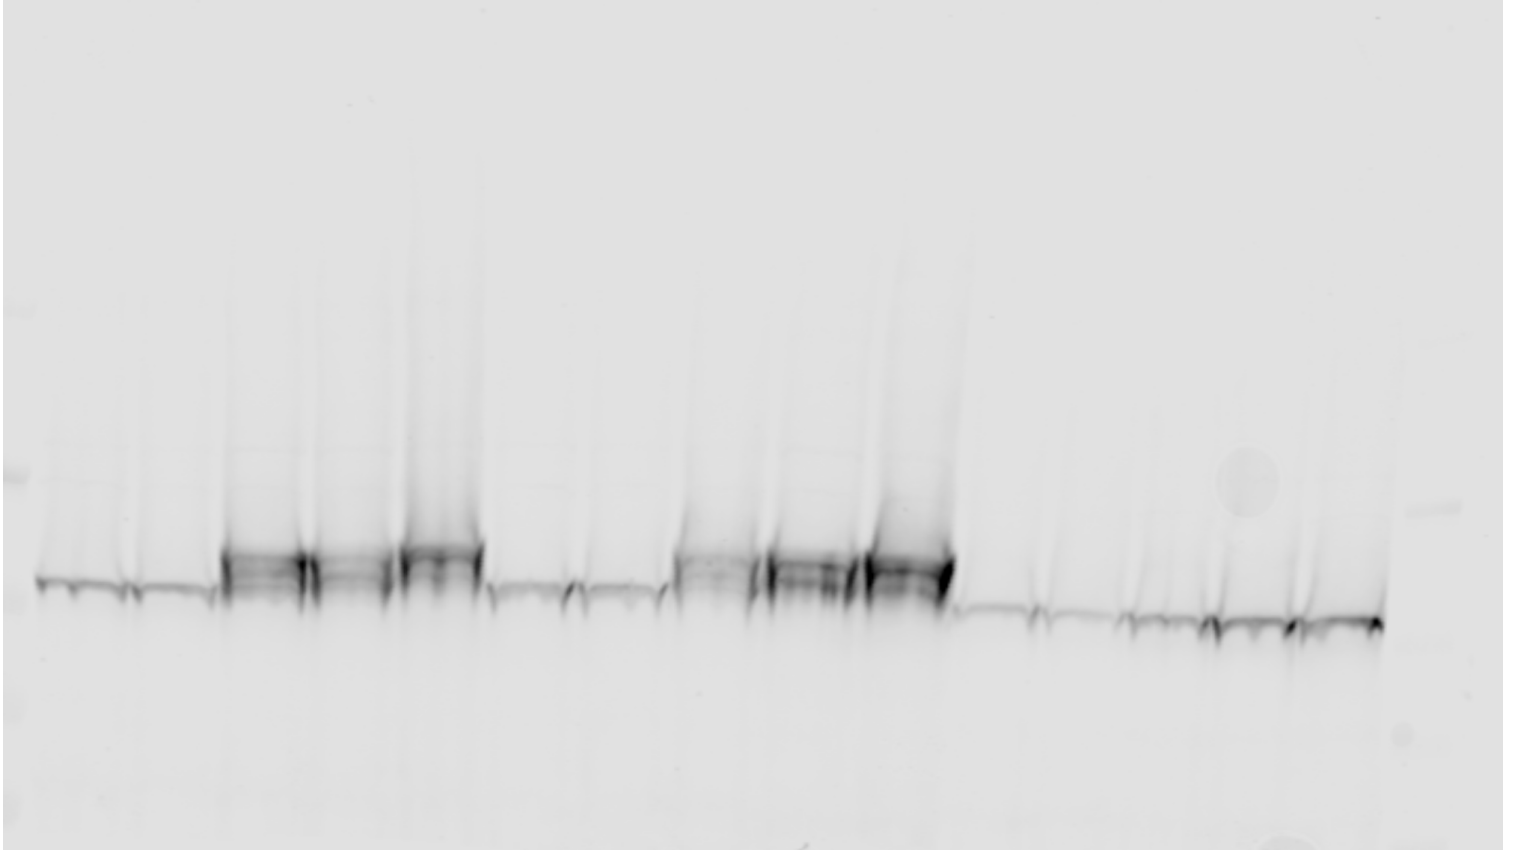

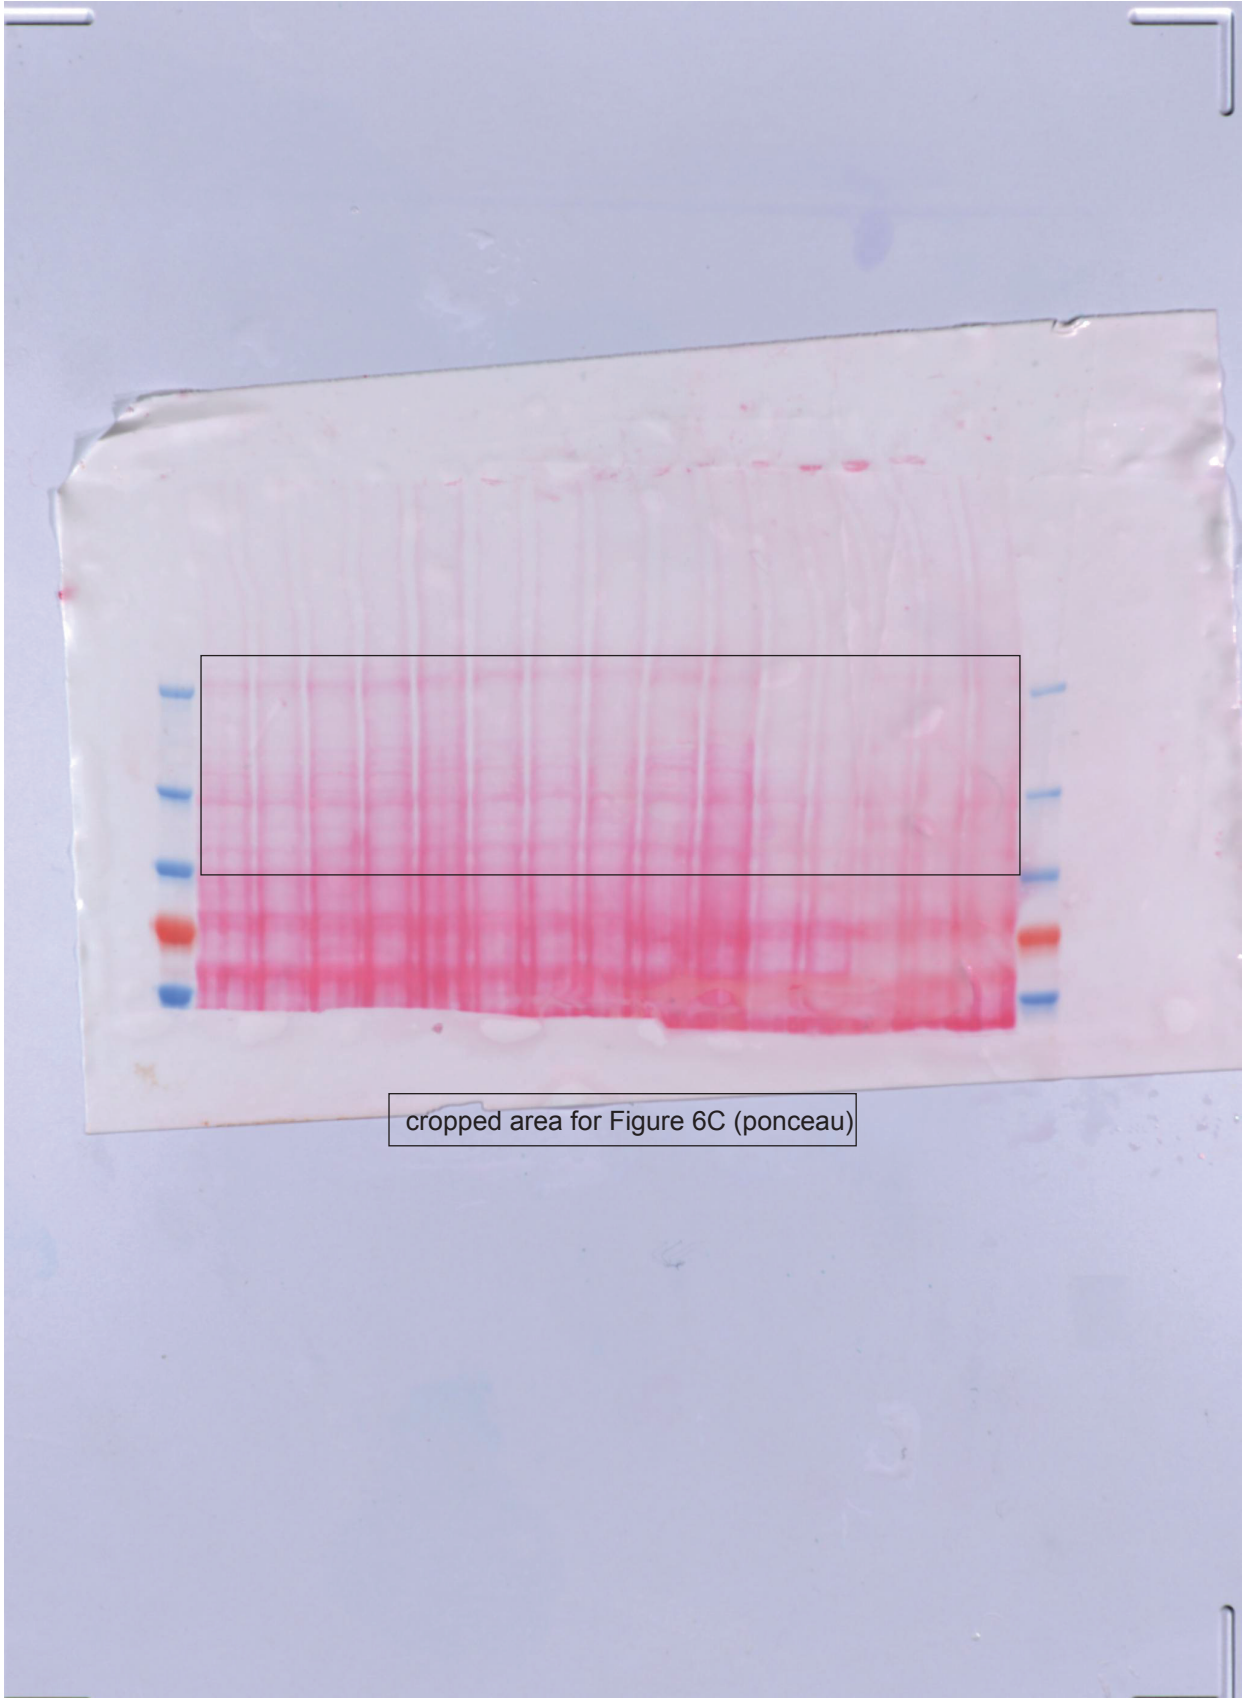

cropped area for Figure 6C (ponceau)

---

Figure 6 - source data 7.pdf  
2048 x 2816

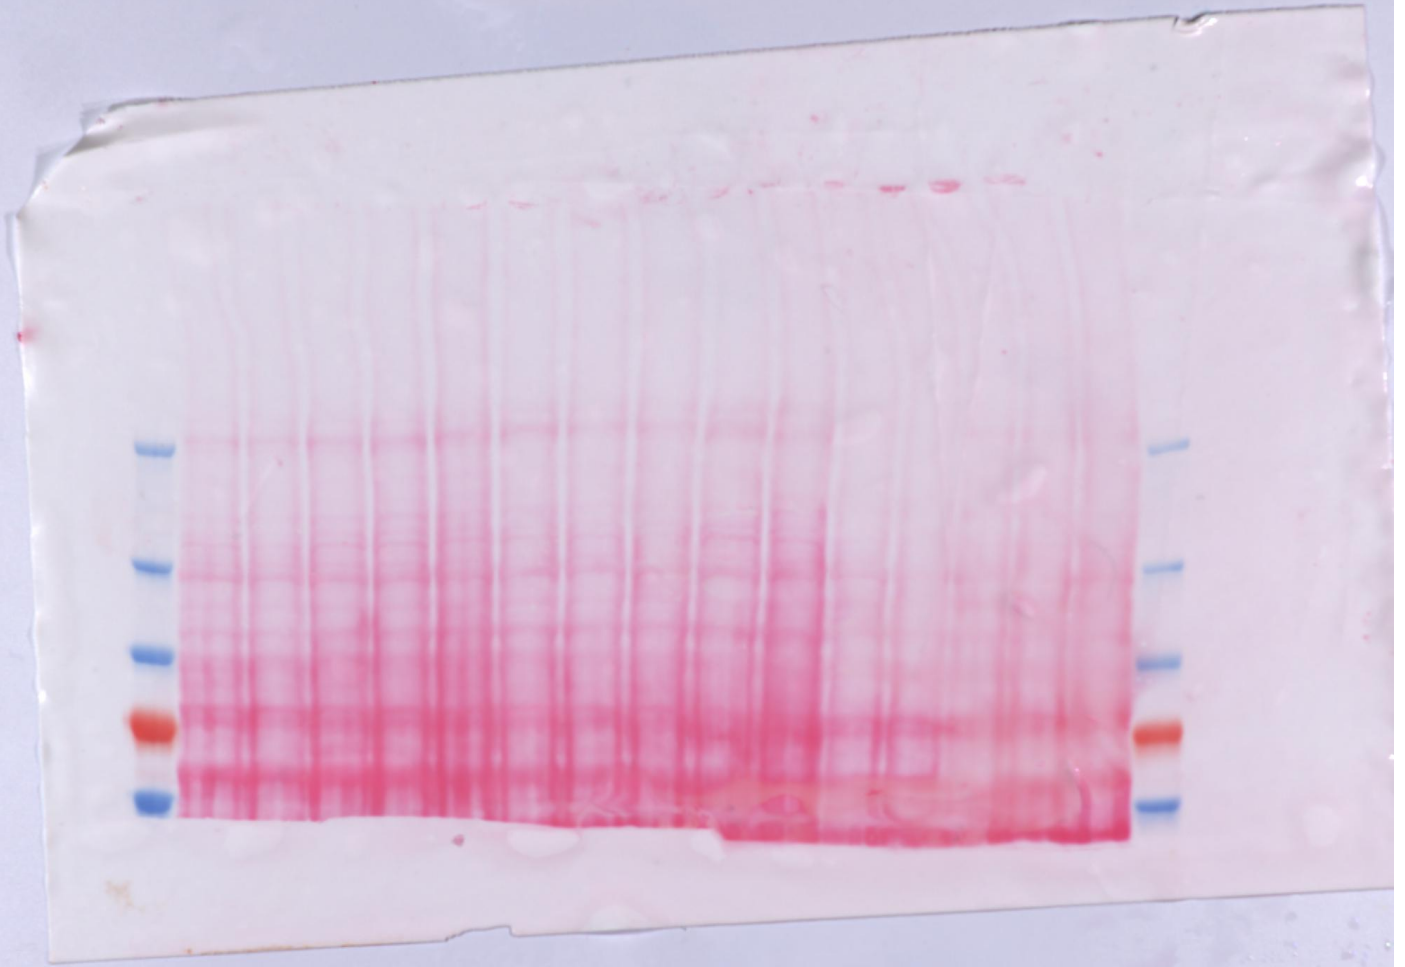



---

Figure 6 - source data 8.pdf  
2048 x 2816

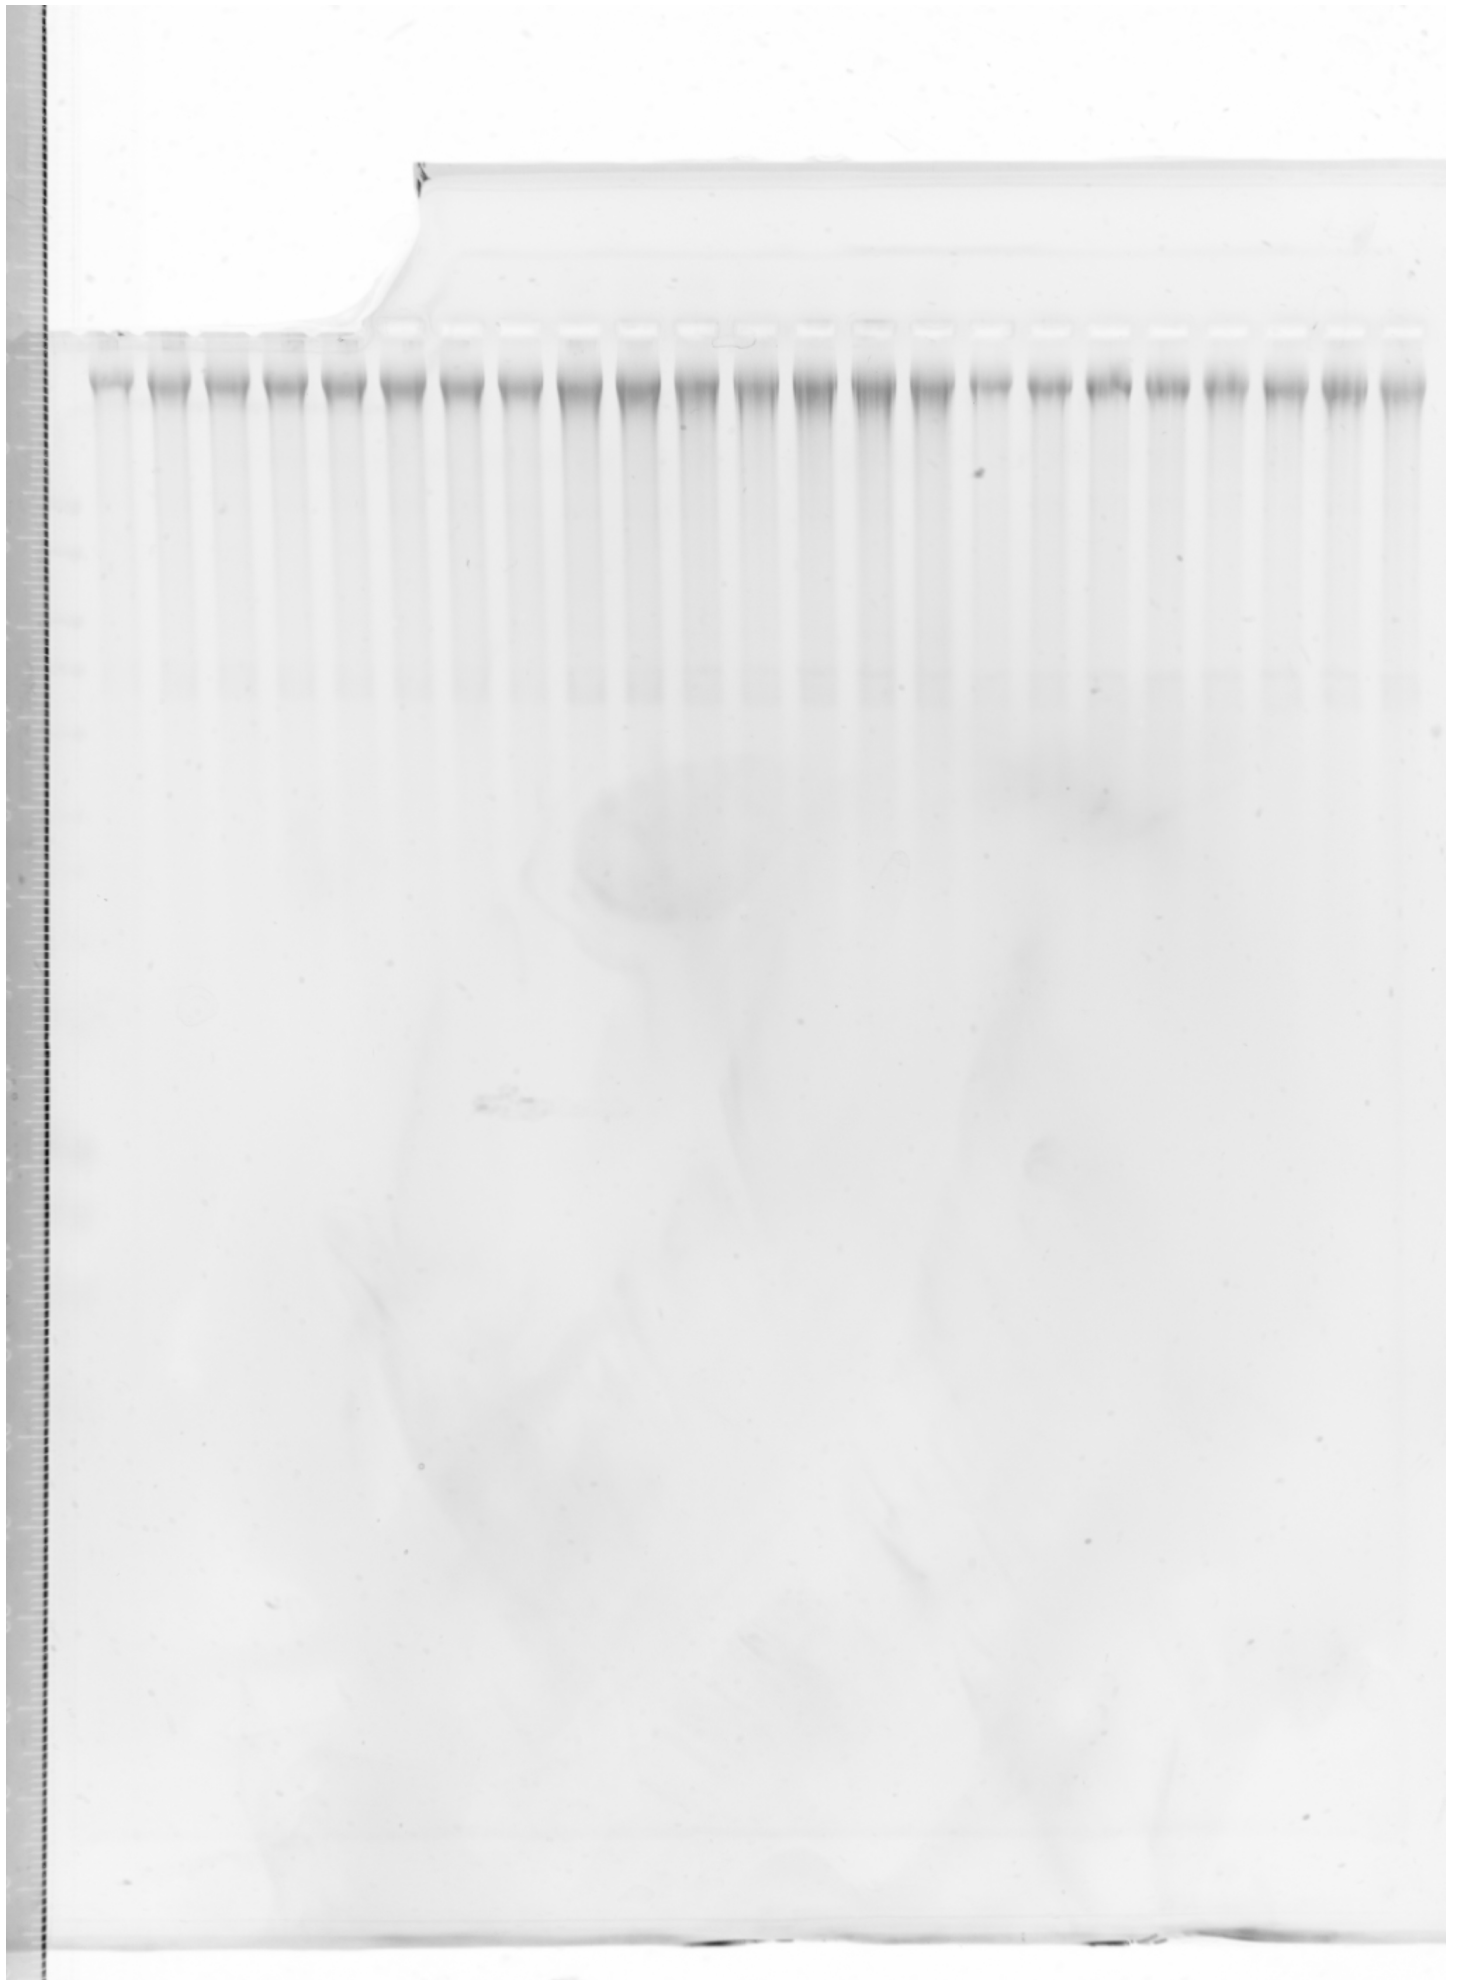

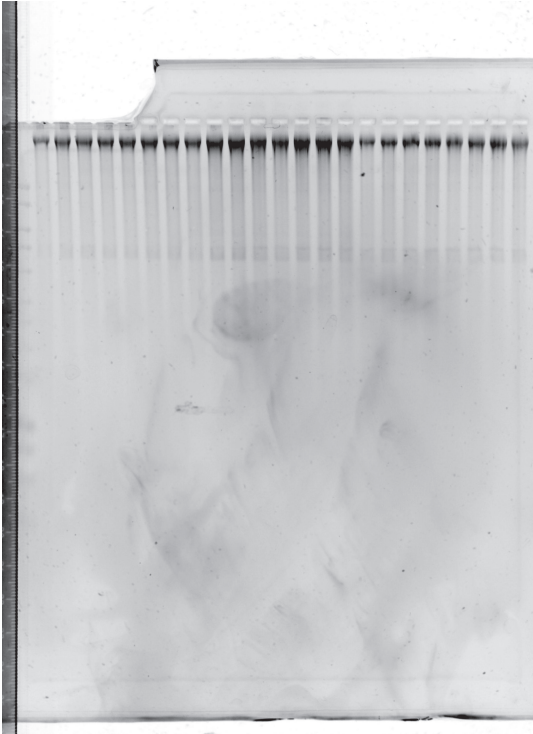

ethidium bromide stain to align bp ladder

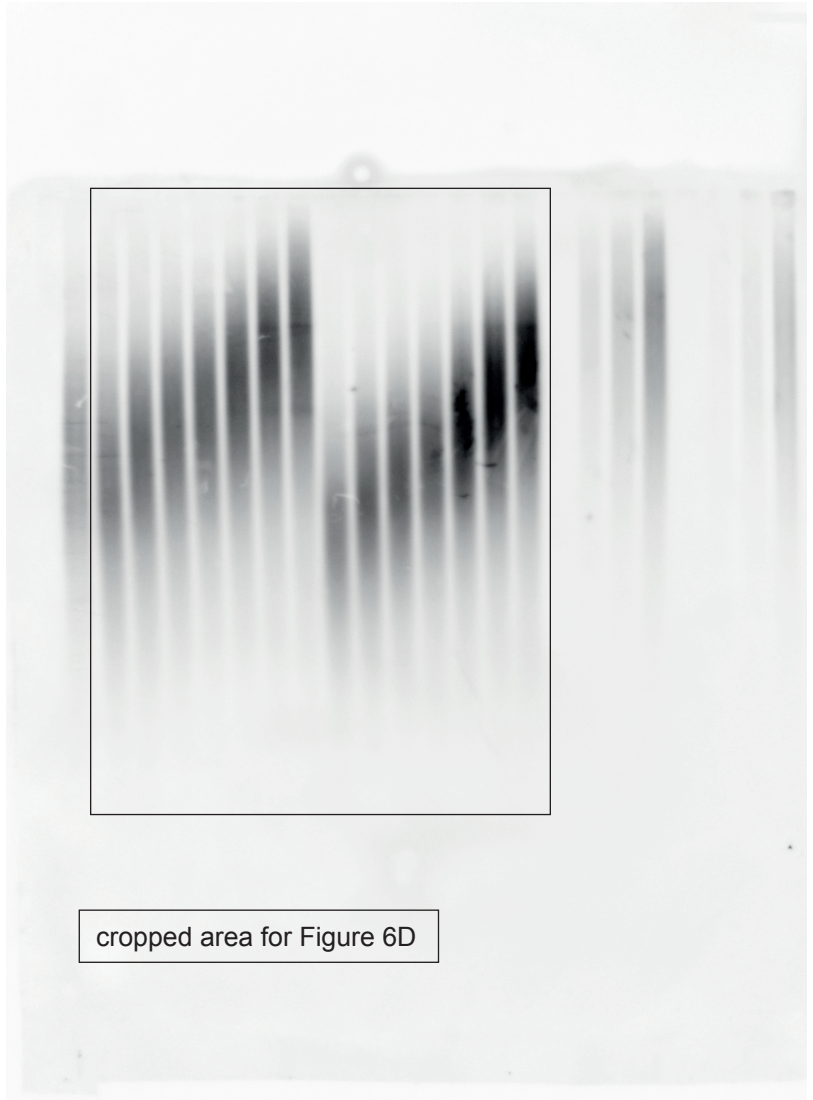

cropped area for Figure 6D

---

Figure 6 - source data 9.pdf  
2048 x 2816

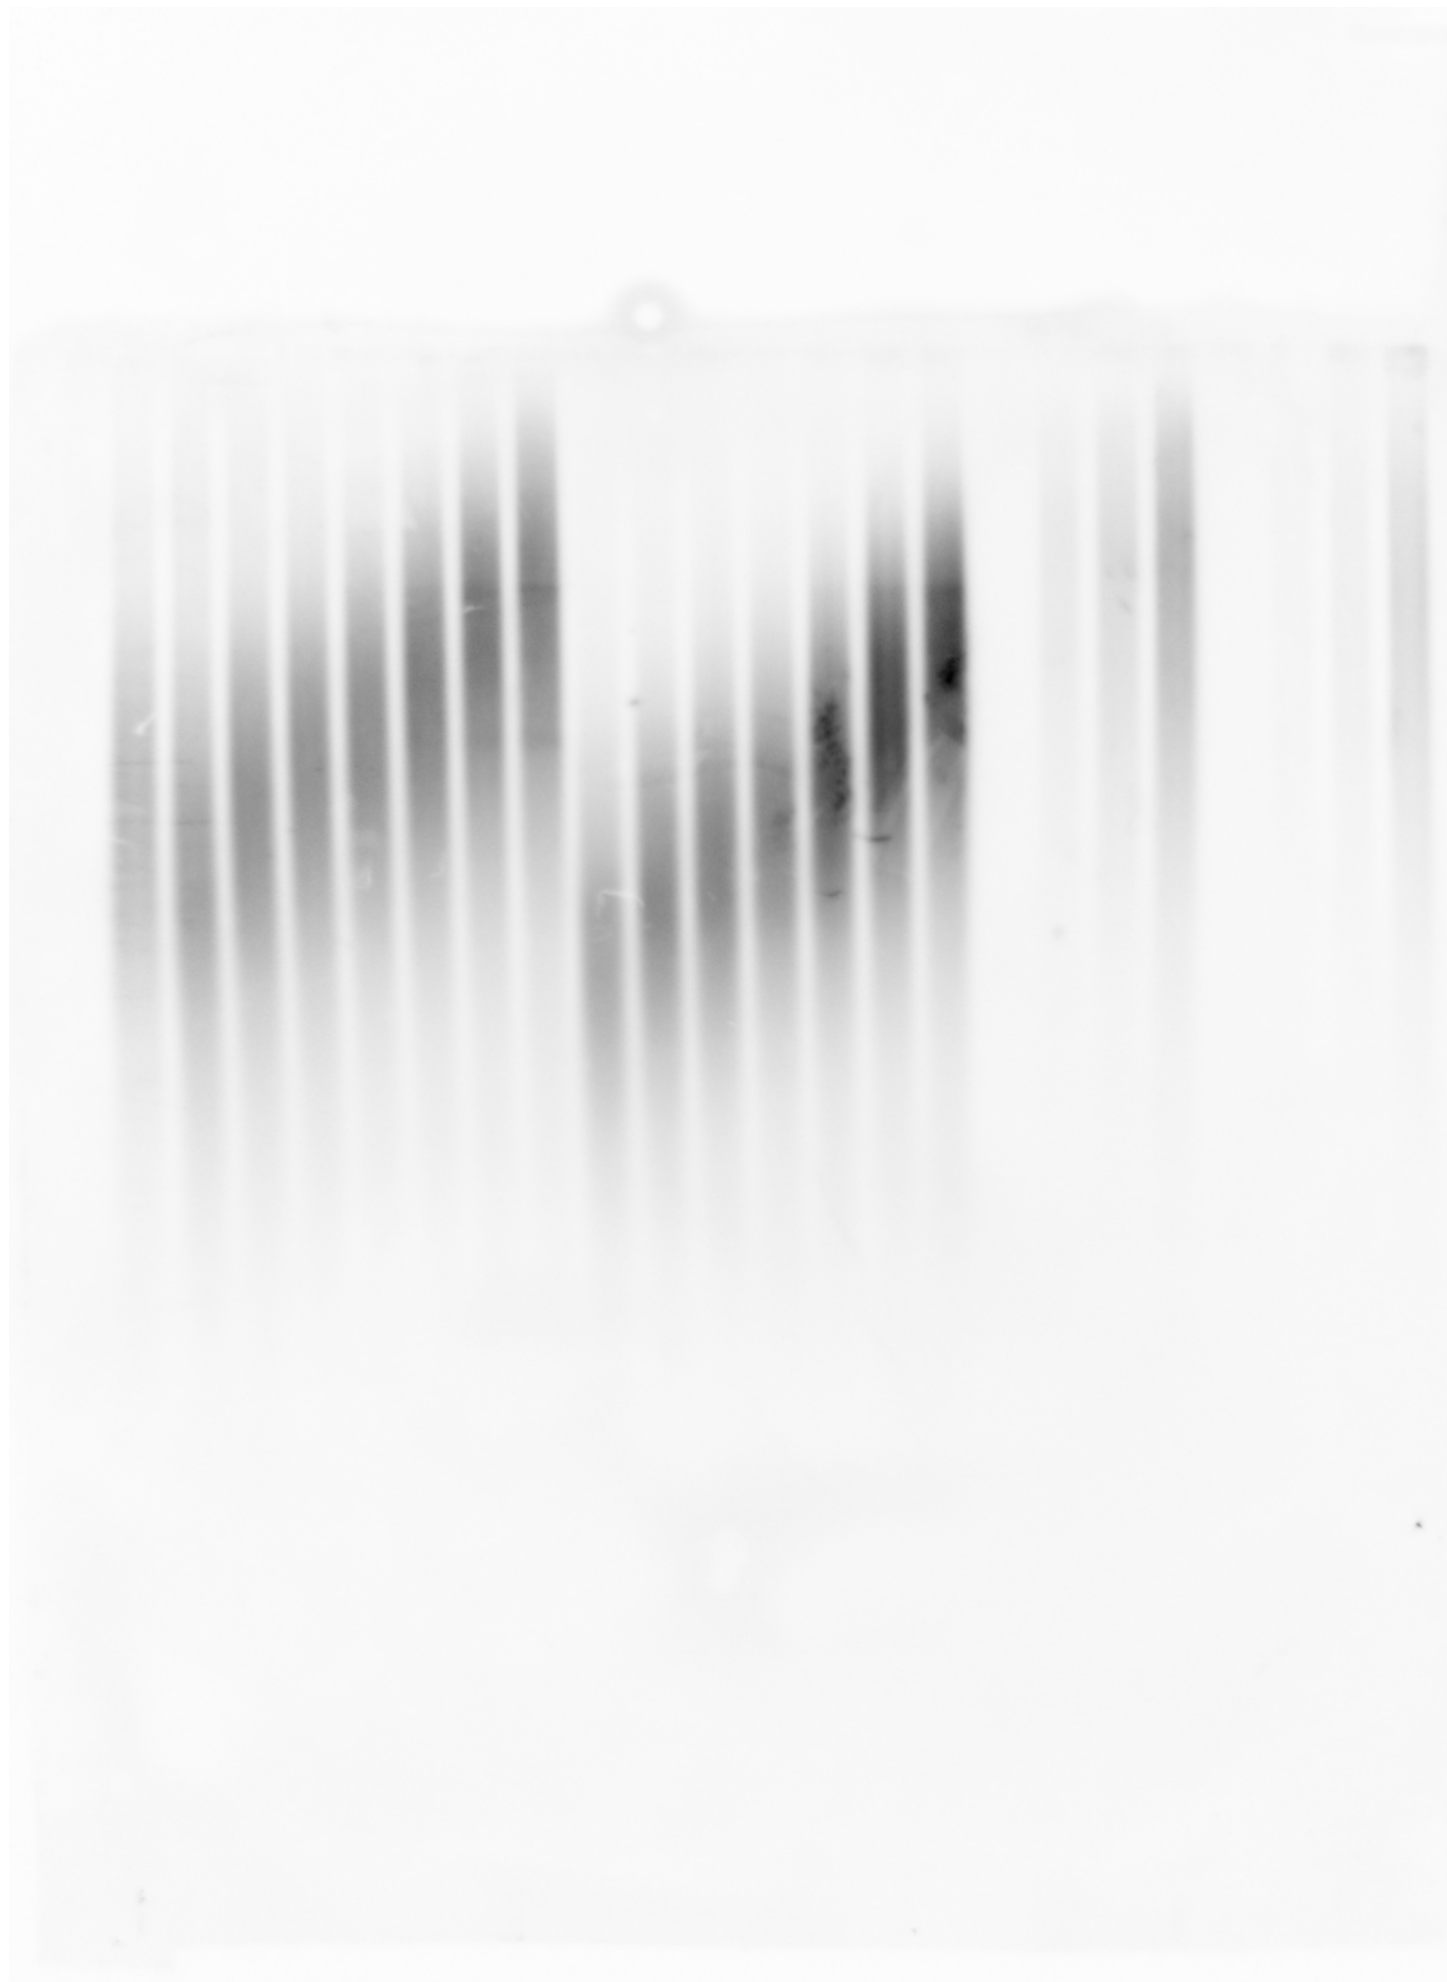

Supplement: fig6-data1 [file elife-69726-fig6-data1-v2.pdf]
