# Supplementary material for: Rad53 checkpoint kinase regulation of DNA replication fork rate via Mrc1 phosphorylation
Source: eLife journal article supplement (doi:10.7554/elife.69726), 2021-08-13

---

Figure 7 - source data 1.pdf  
2048 x 2816

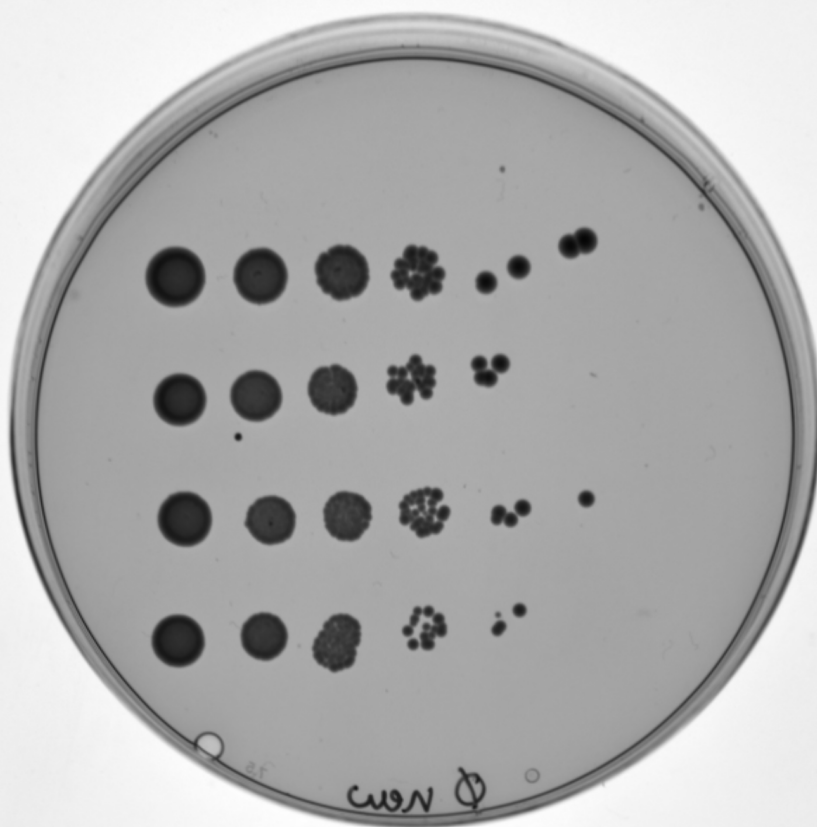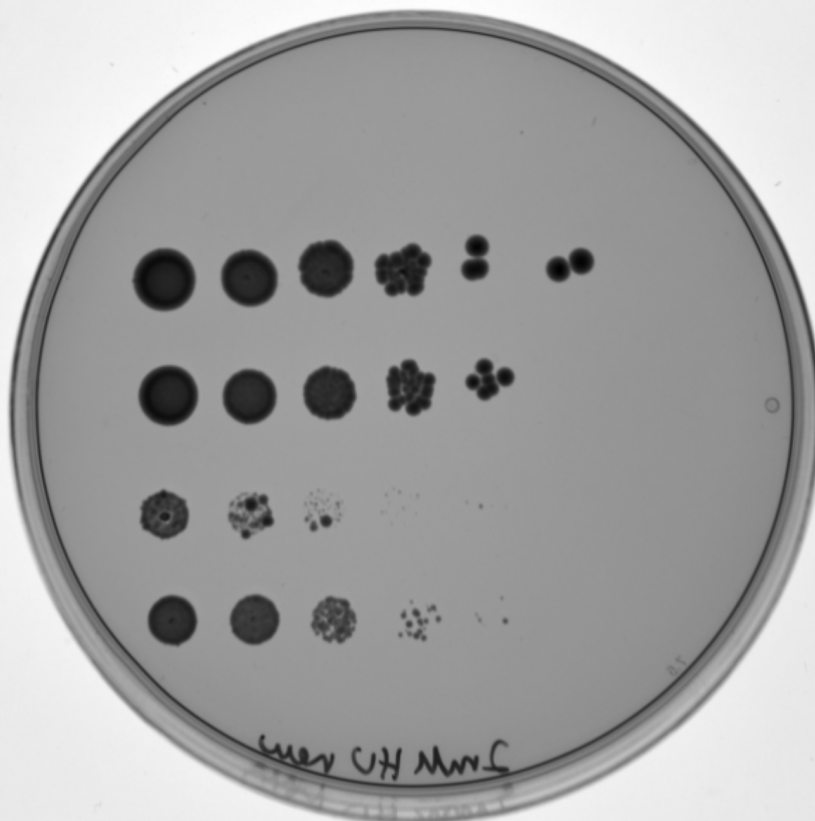

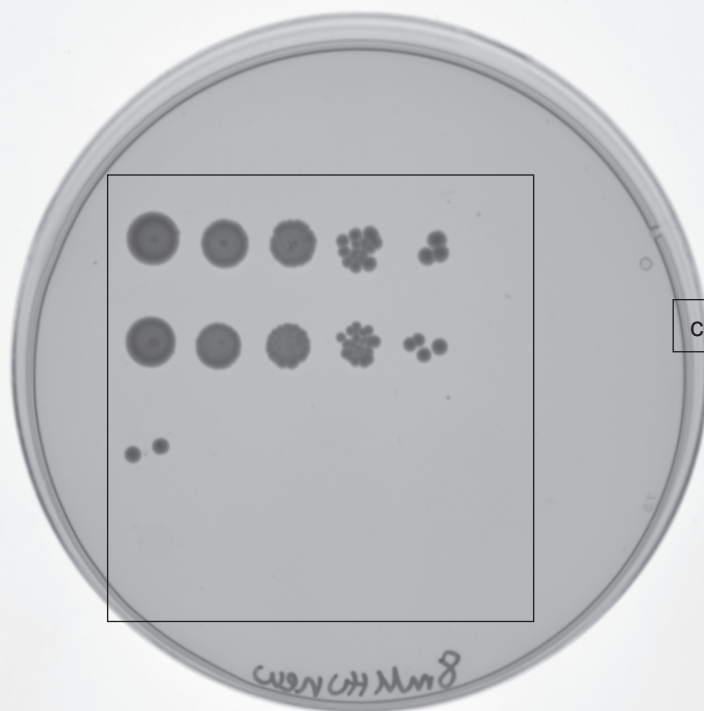

cropped area for Figure 7A top 8 mM HU

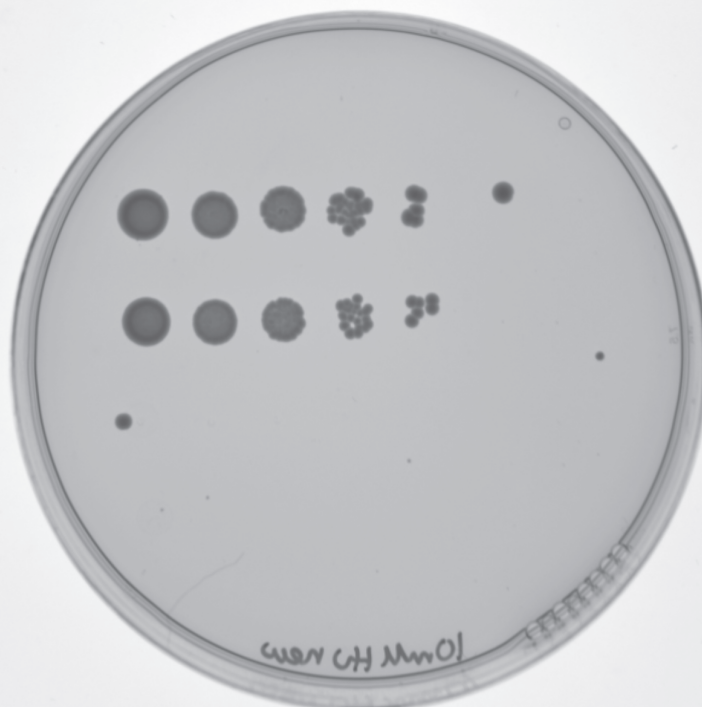

---

Figure 7 - source data 2.pdf  
2048 x 2816



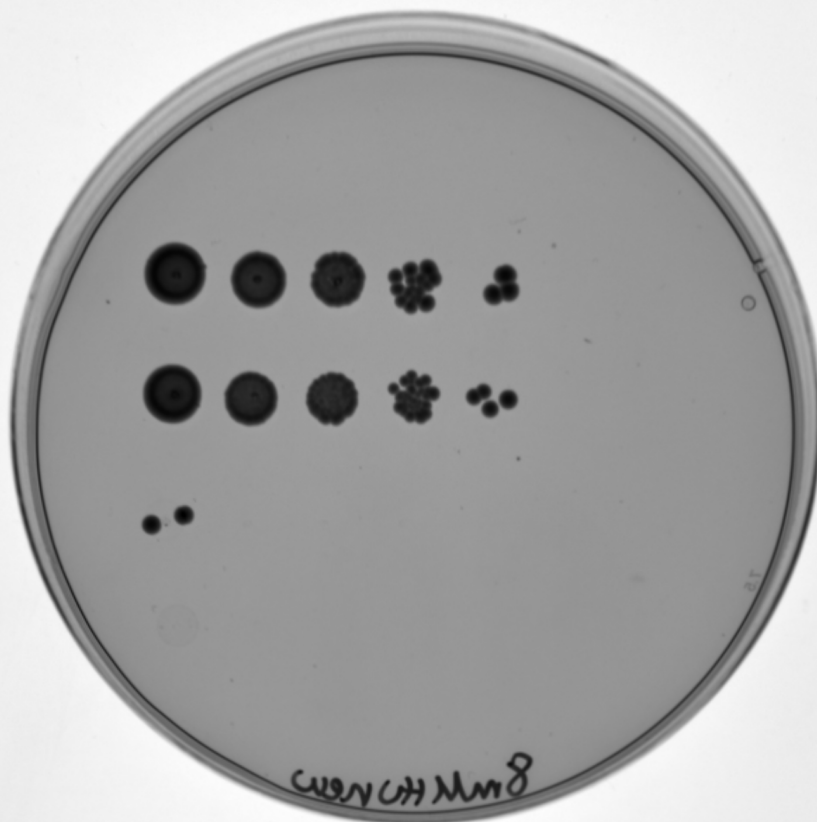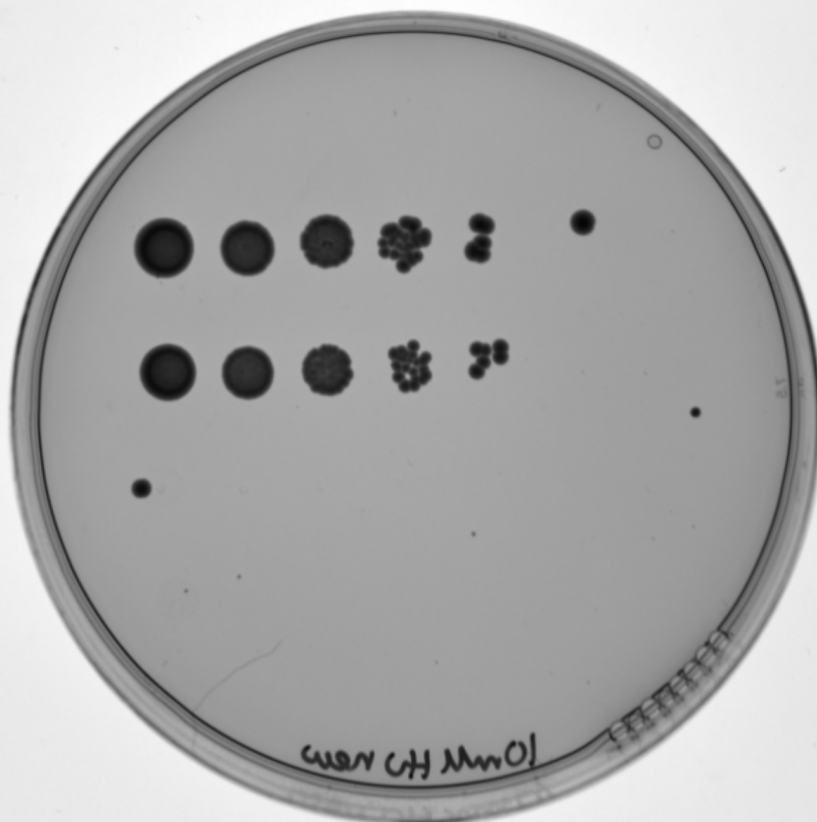

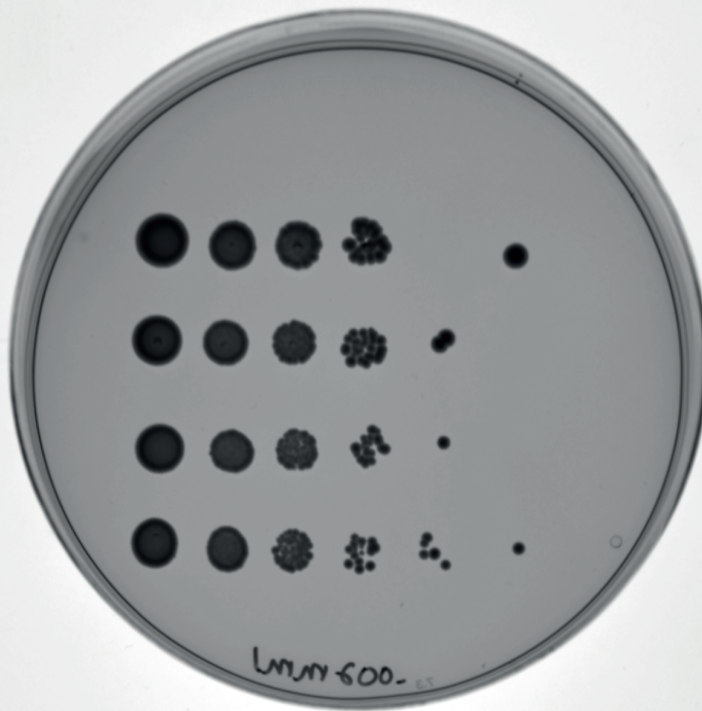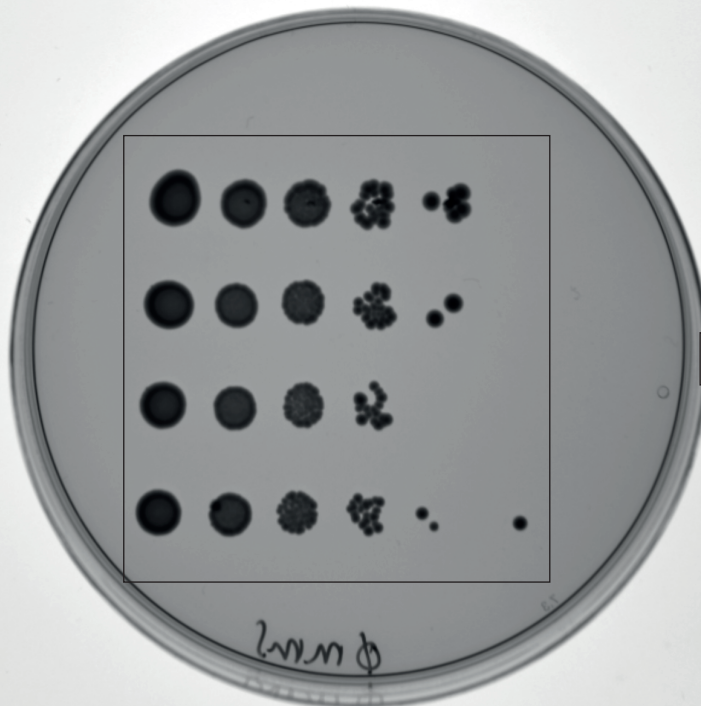

cropped area for Figure 7A bottom YPD

---

Figure 7 - source data 3.pdf  
2048 x 2816

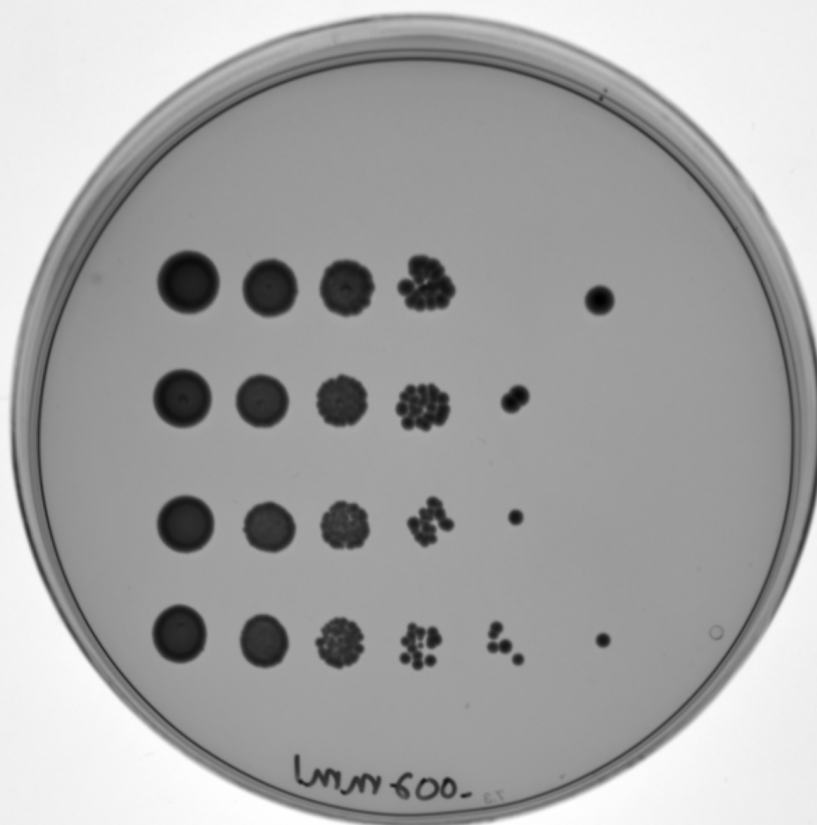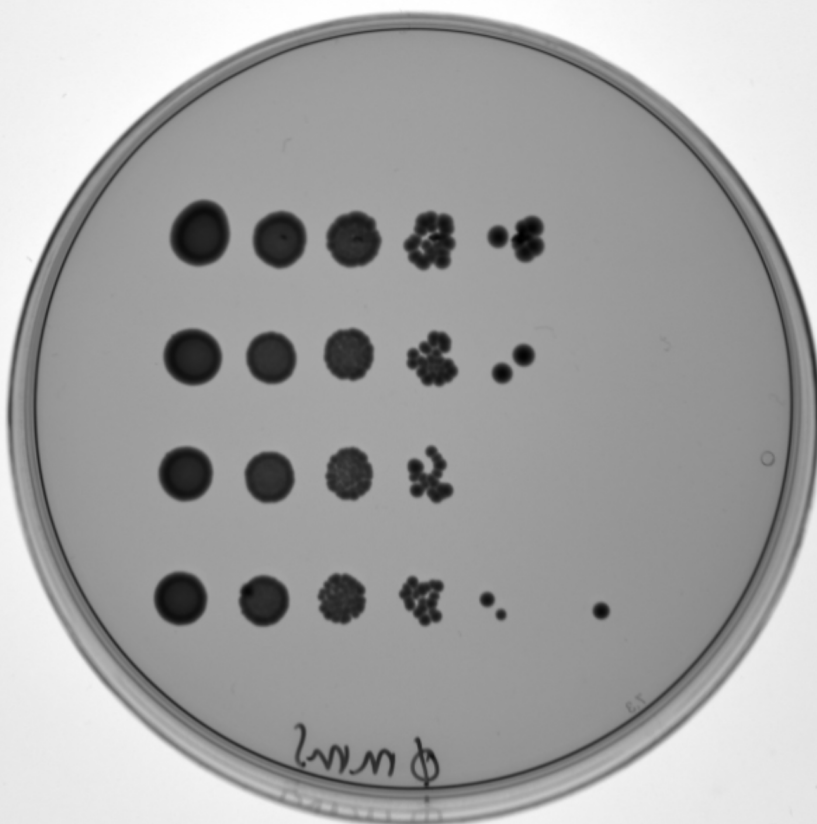



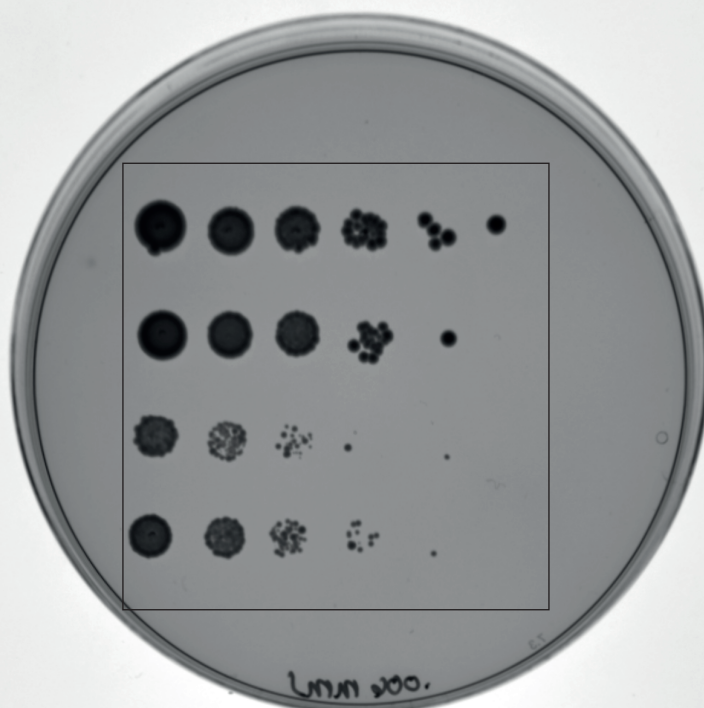

cropped area for  
Figure 7A bottom 0.006% MMS

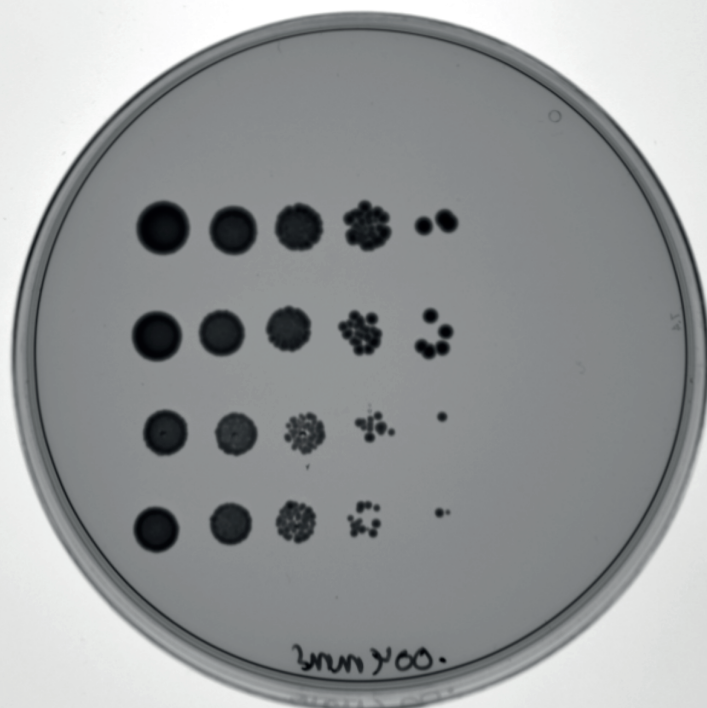

---

Figure 7 - source data 4.pdf  
2048 x 2816

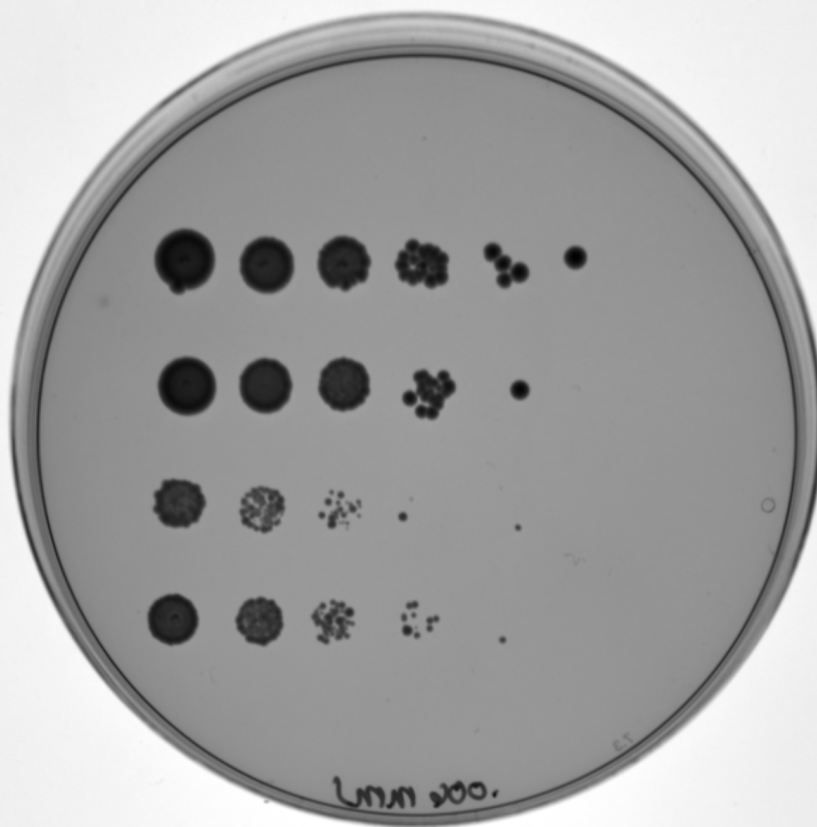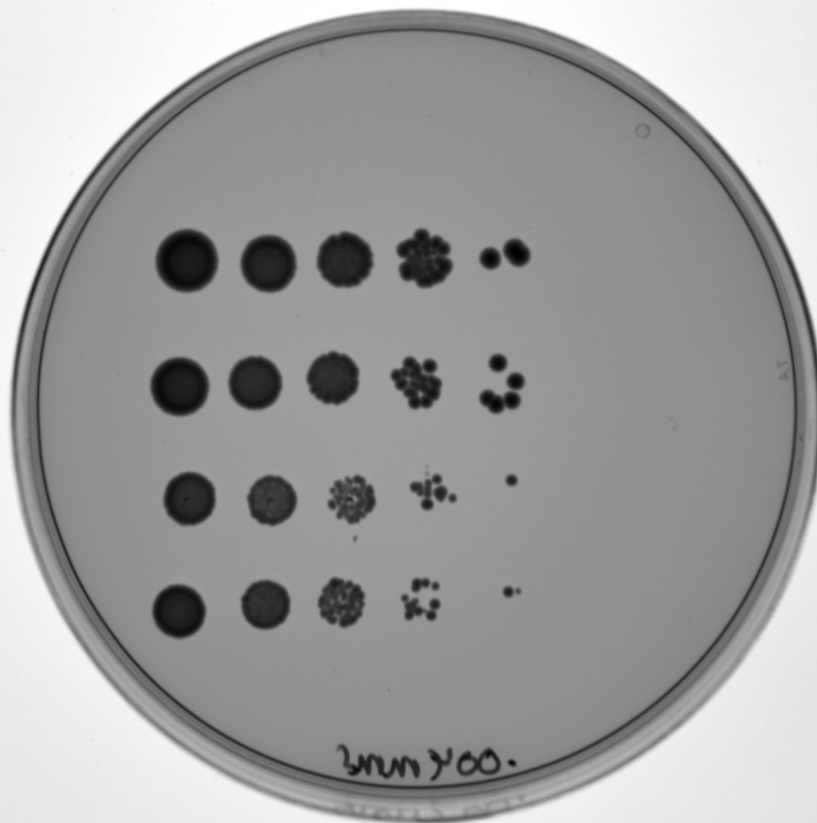

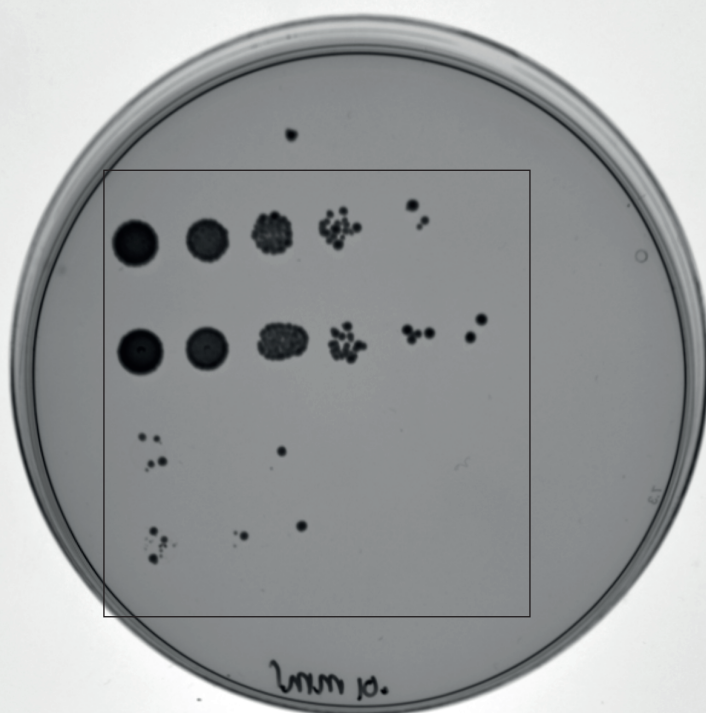

cropped area for  
Figure 7A bottom 0.01% MMS

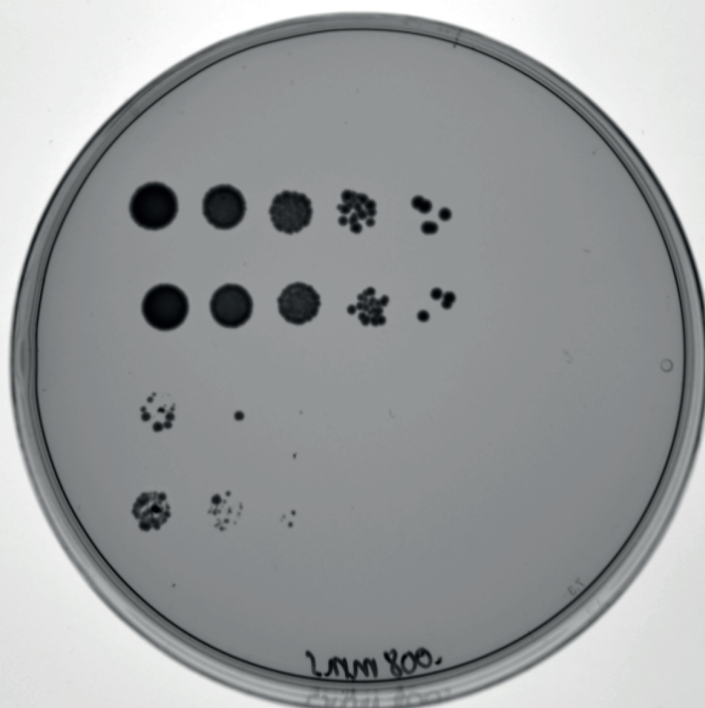



---

Figure 7 - source data 5.pdf  
2048 x 2816

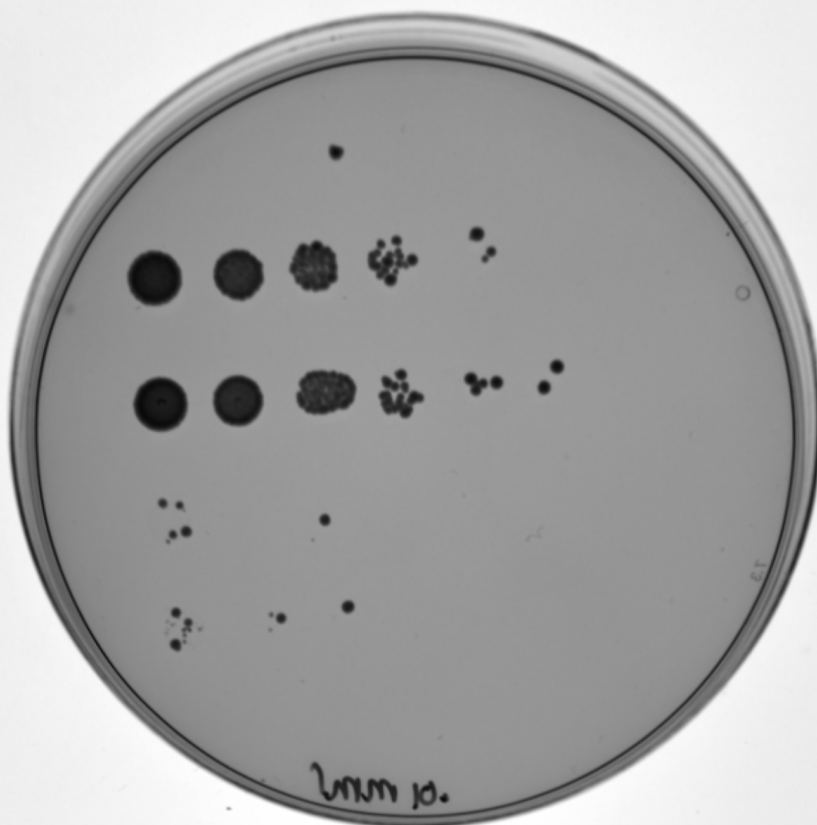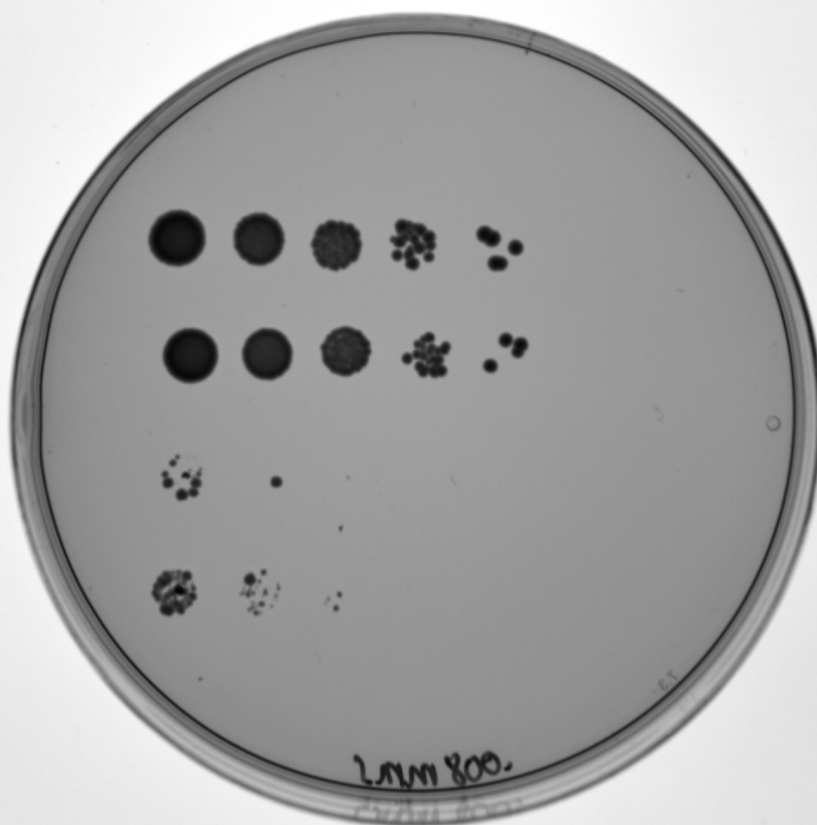

Supplement: fig7-data1 [file elife-69726-fig7-data1-v2.pdf]
