# Supplementary material for: Rad53 checkpoint kinase regulation of DNA replication fork rate via Mrc1 phosphorylation
Source: eLife journal article supplement (doi:10.7554/elife.69726), 2021-08-13

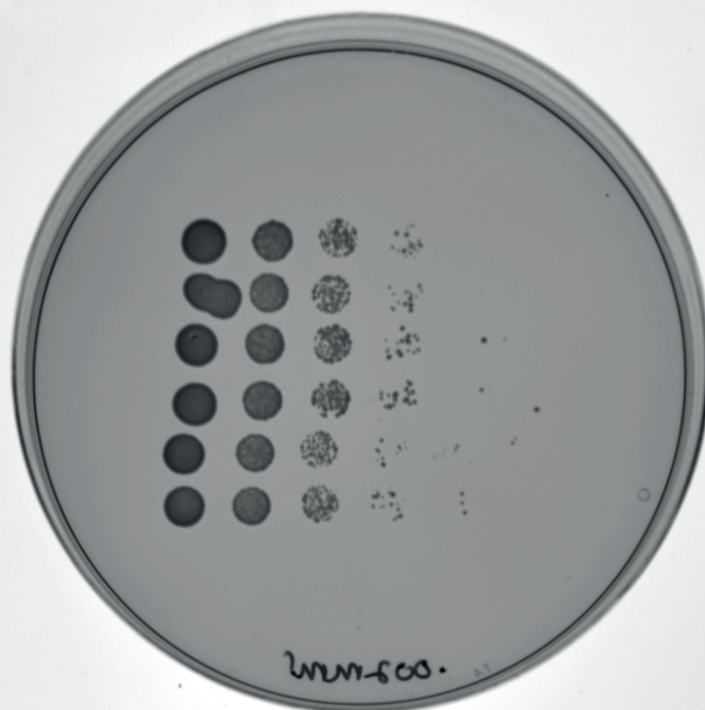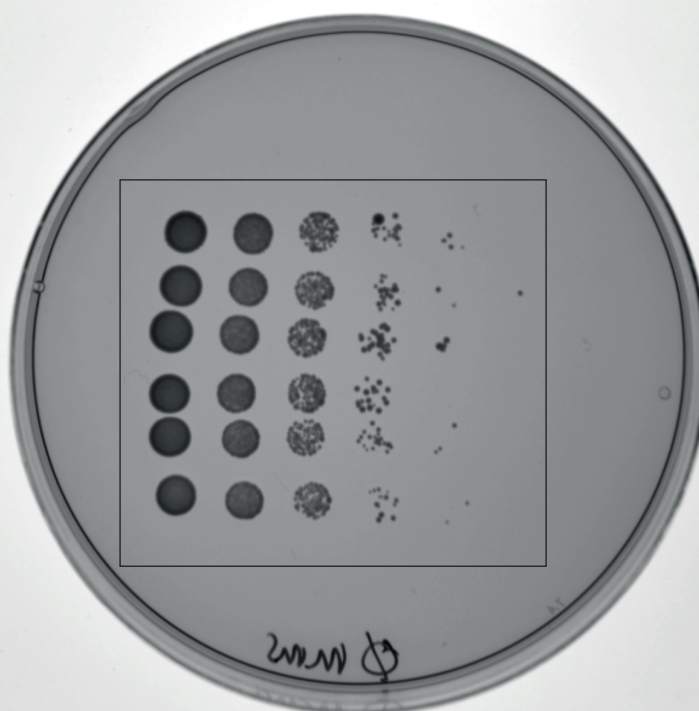

cropped area for Figure 7 -  
figure supplement 1  
top (2-day) YPD

---

Figure 7 - figure supplement 1 - source data 1.pdf  
2048 x 2816



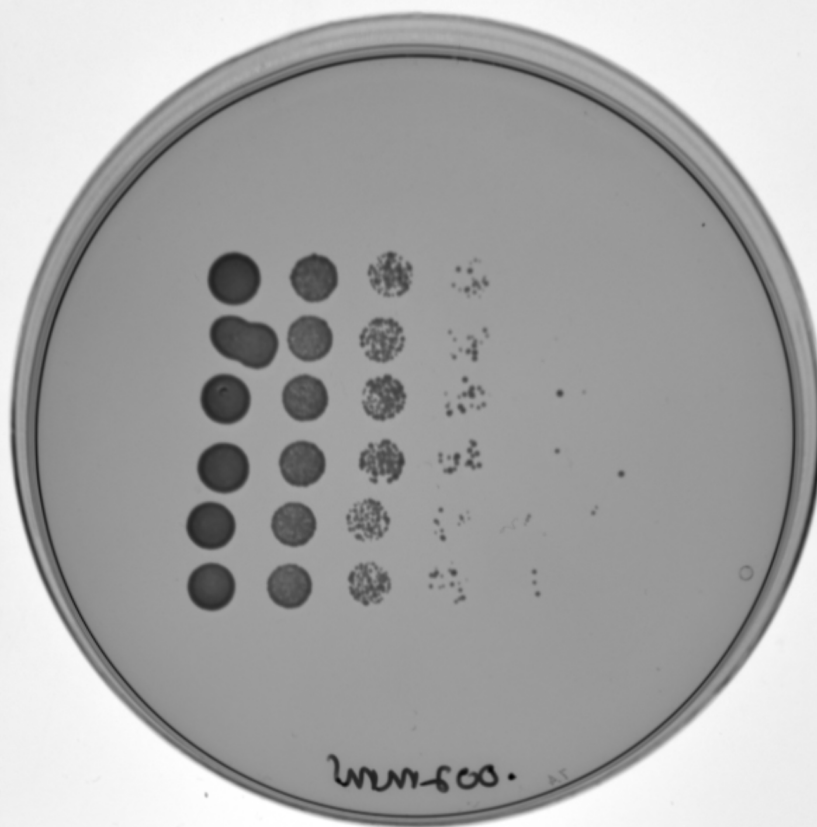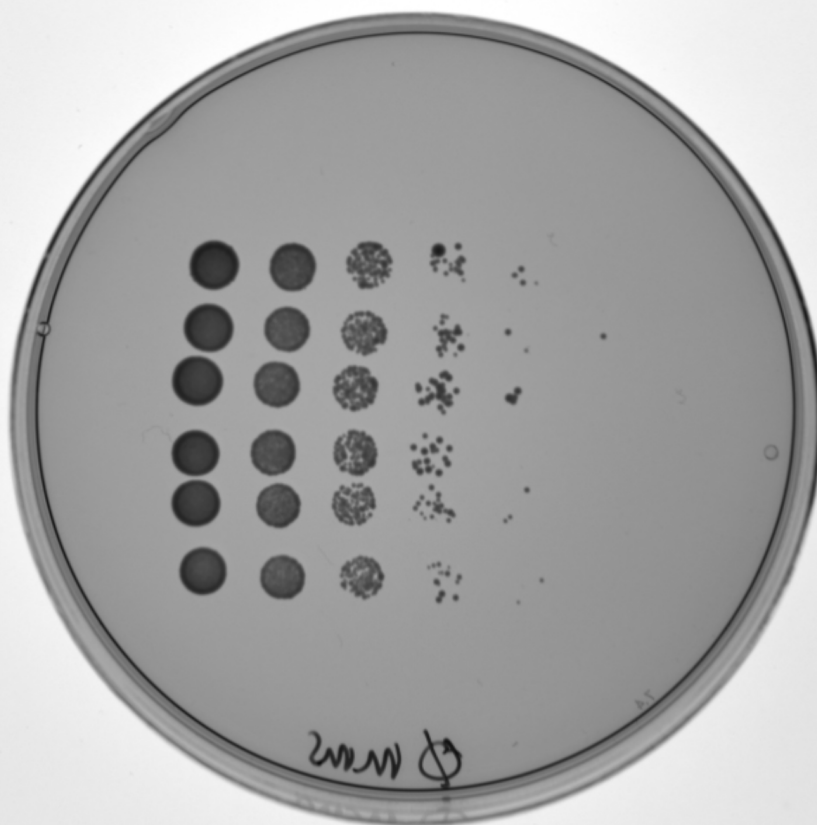

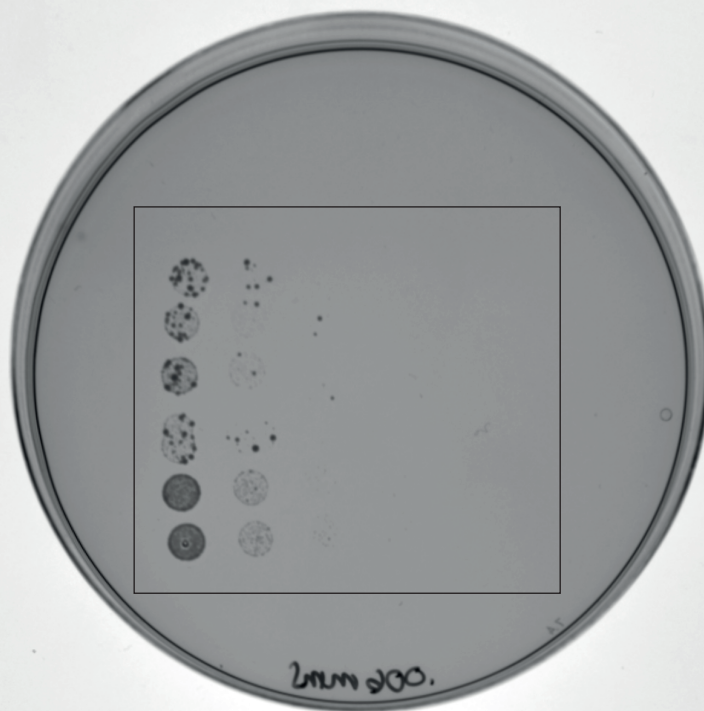

cropped area for Figure 7 -  
figure supplement 1  
top (2-day) 0.006% MMS

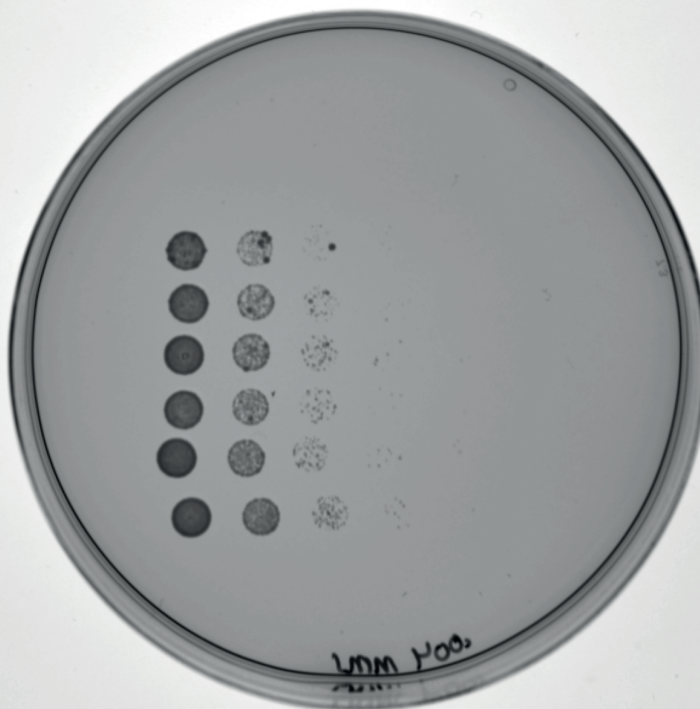

---

Figure 7 - figure supplement 1 - source data 2.pdf  
2048 x 2816

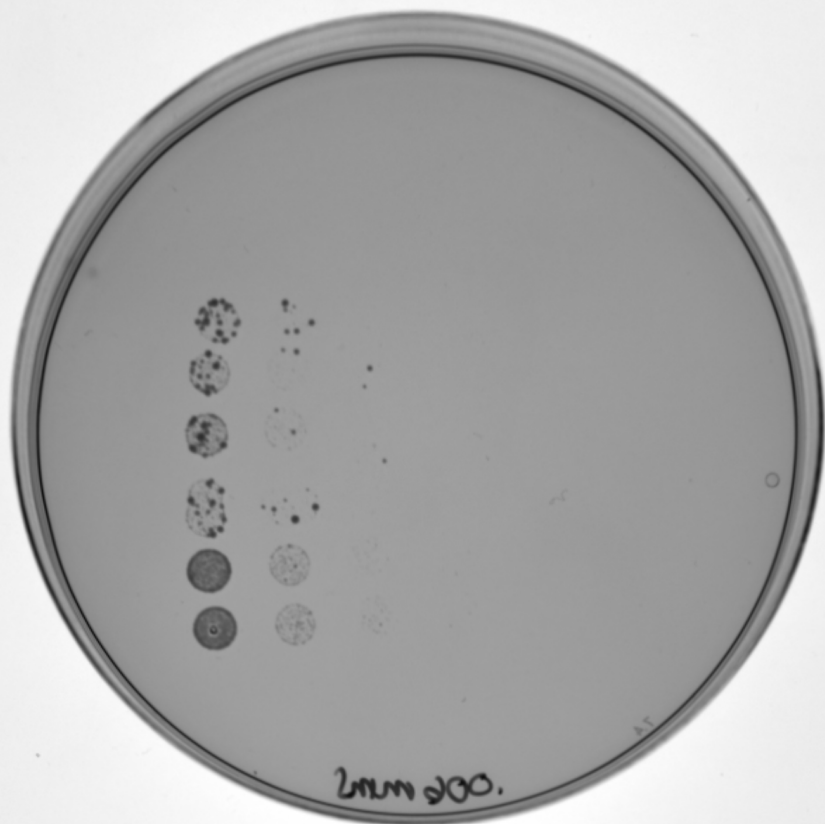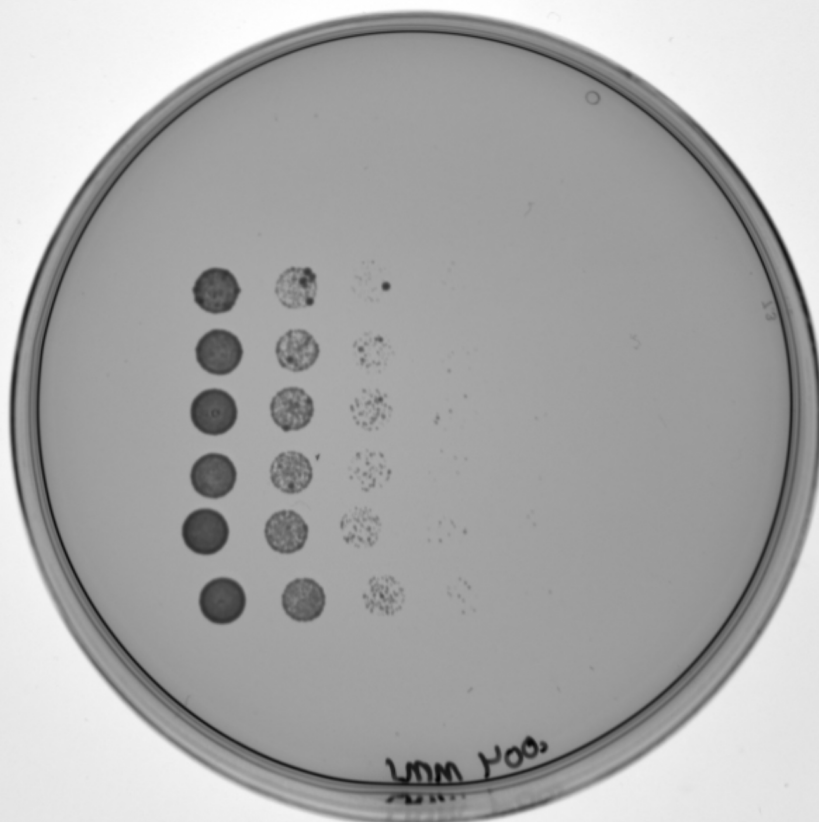



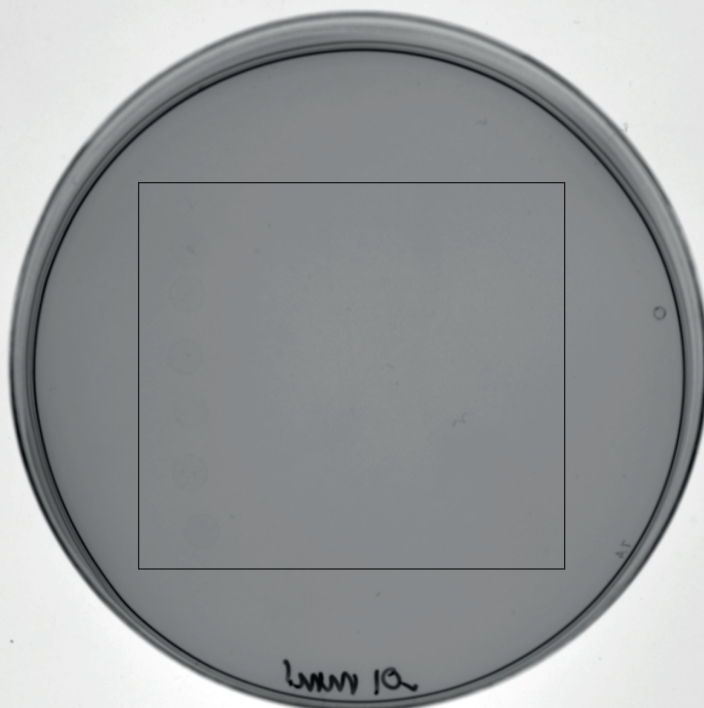

cropped area for Figure 7 -  
figure supplement 1  
top (2-day) 0.01% MMS

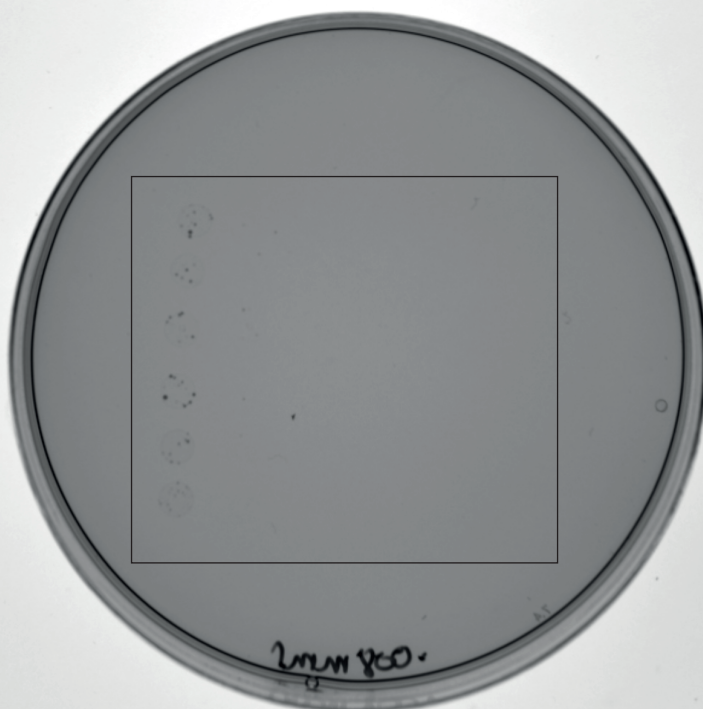

cropped area for Figure 7 -  
figure supplement 1  
top (2-day) 0.008% MMS



---

Figure 7 - figure supplement 1 - source data 3.pdf  
2048 x 2816

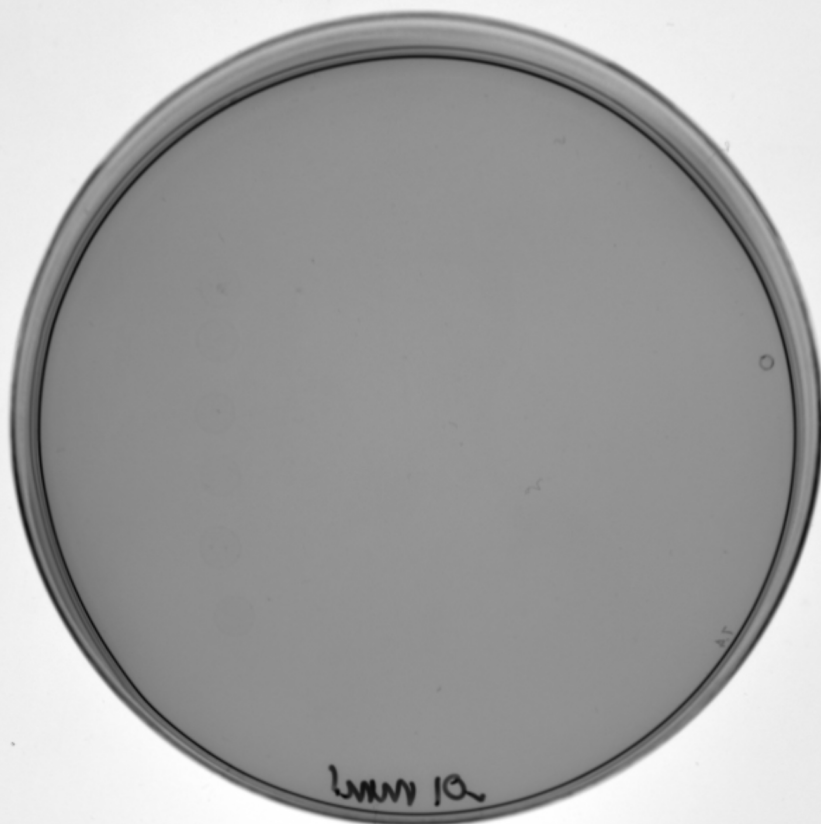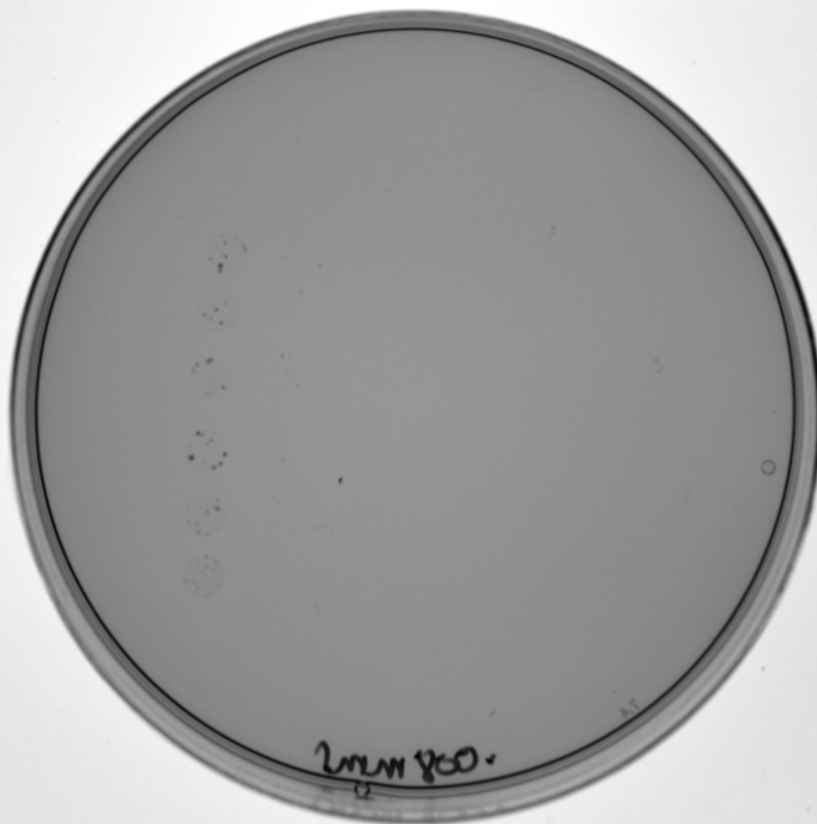

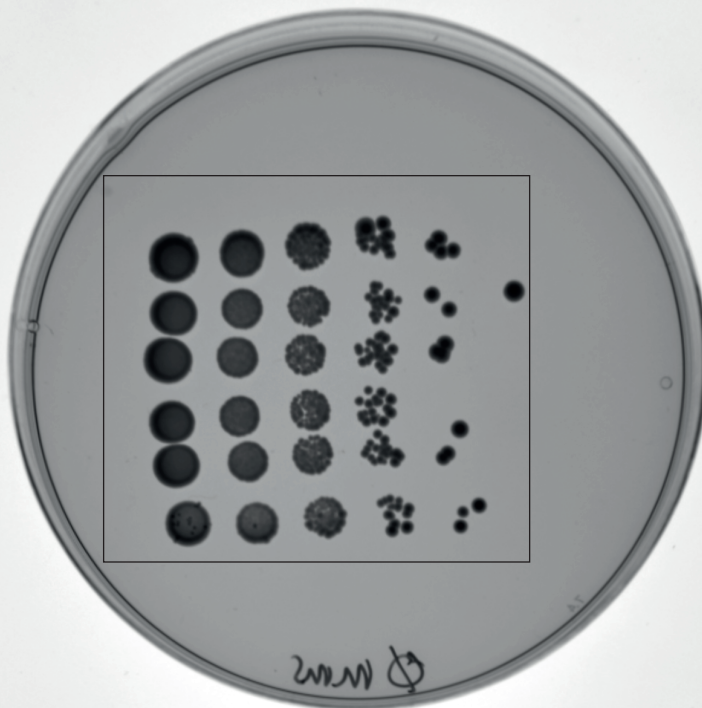

cropped area for Figure 7 -  
figure supplement 1  
bottom (4-day) YPD

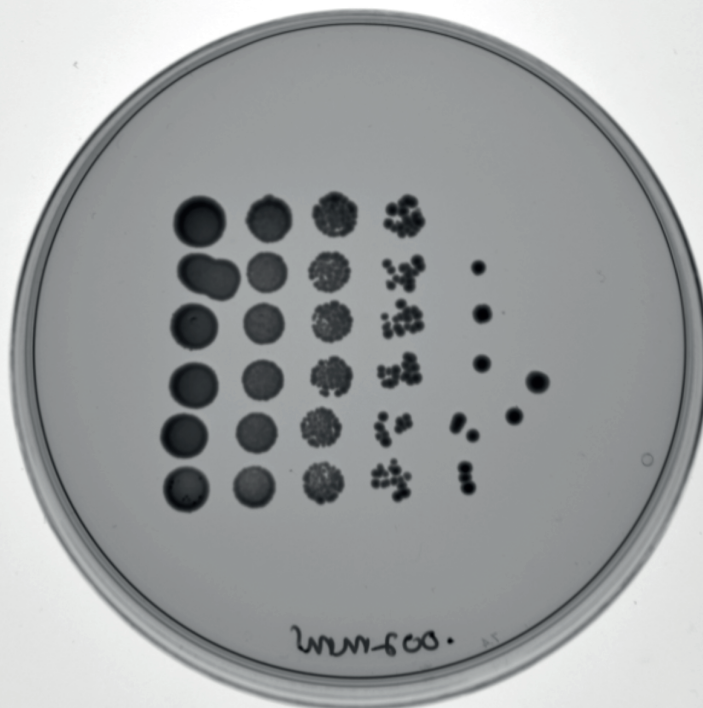

---

Figure 7 - figure supplement 1 - source data 4.pdf  
2048 x 2816

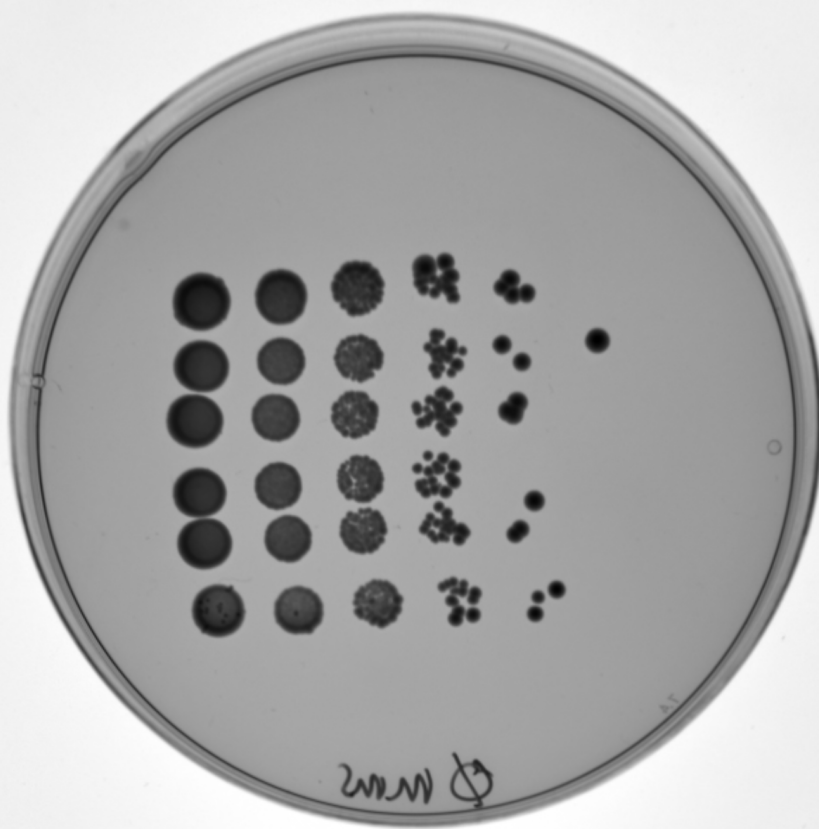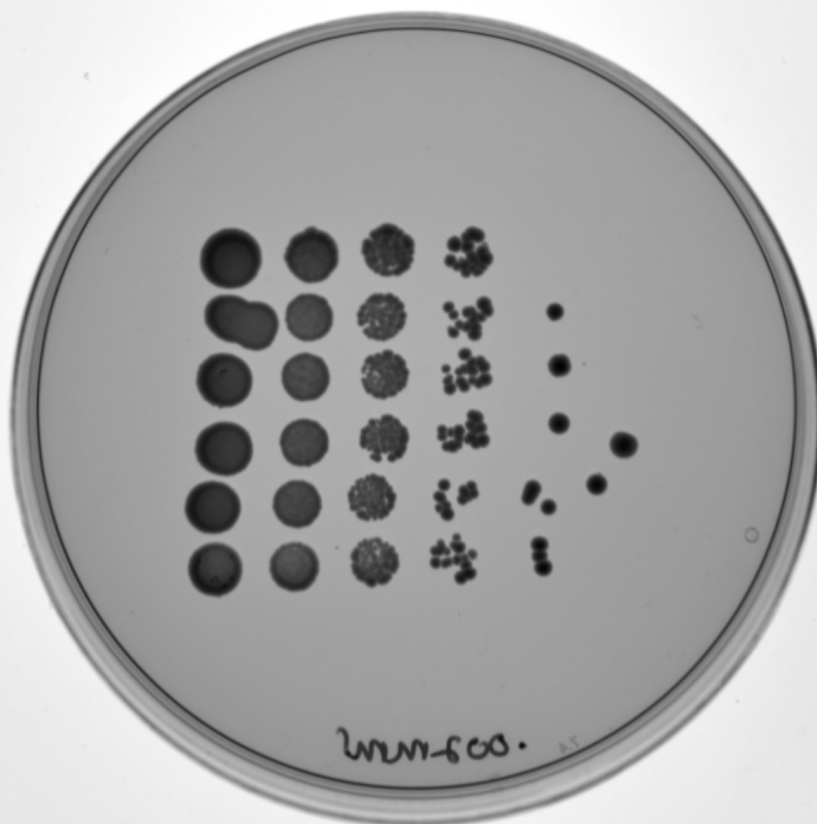



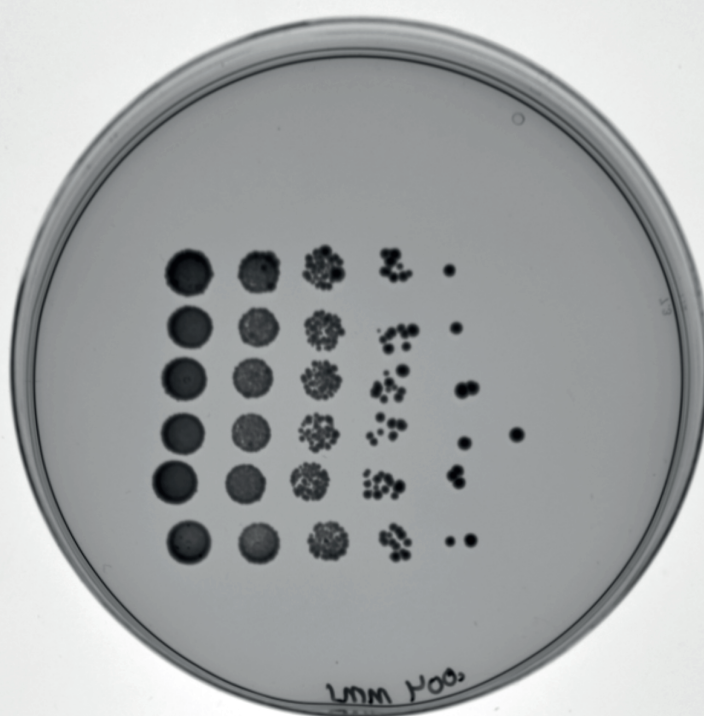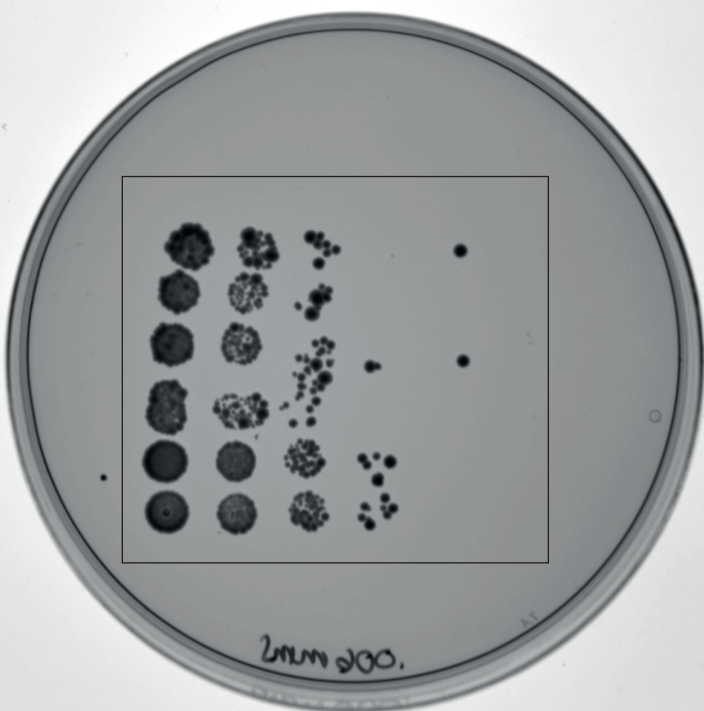

cropped area for Figure 7 -  
figure supplement 1  
bottom (4-day) 0.006% MMS

---

Figure 7 - figure supplement 1 - source data 5.pdf  
2048 x 2816

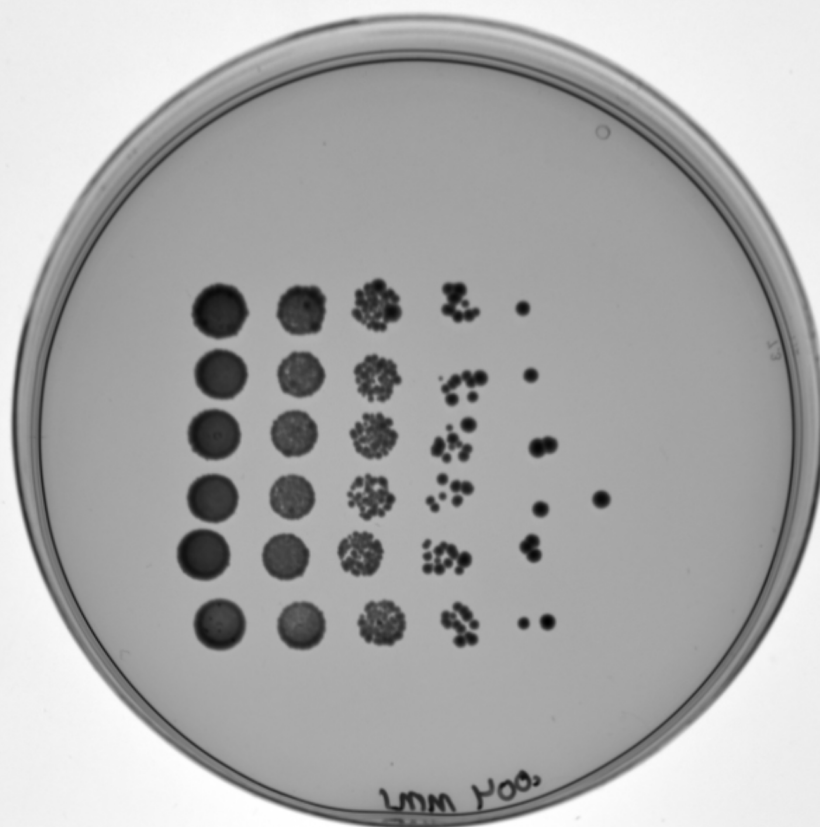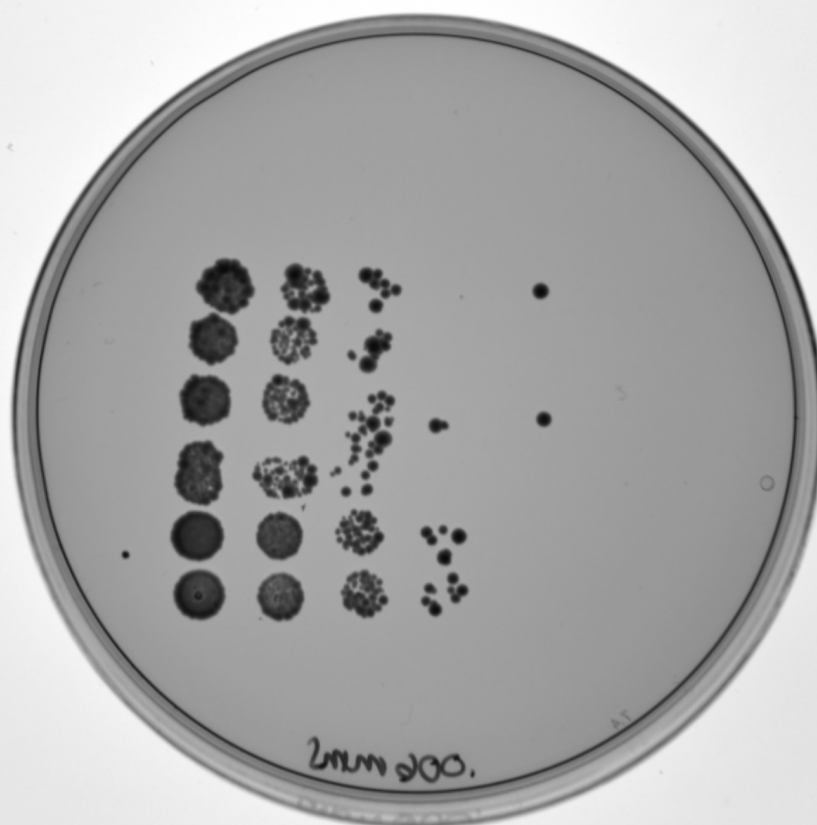

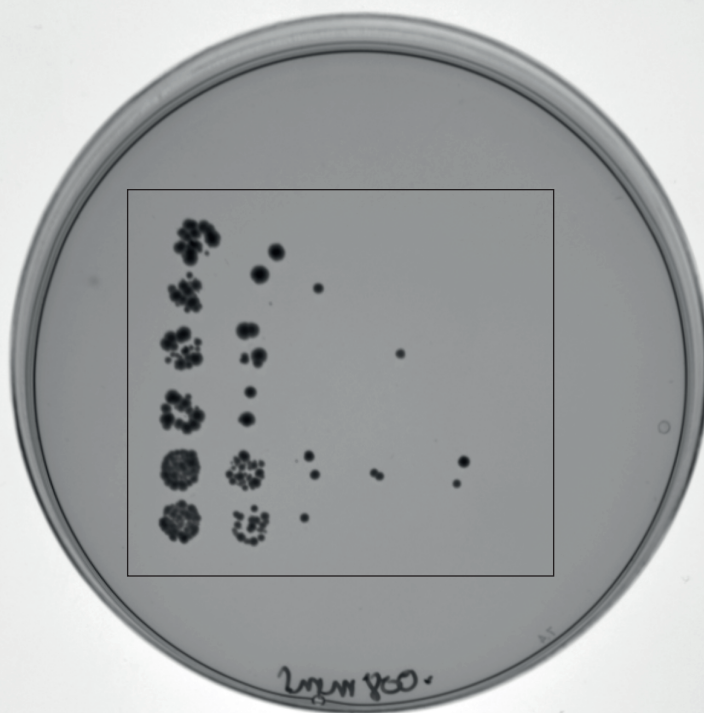

cropped area for Figure 7 -  
figure supplement 1  
bottom (4-day) 0.008% MMS

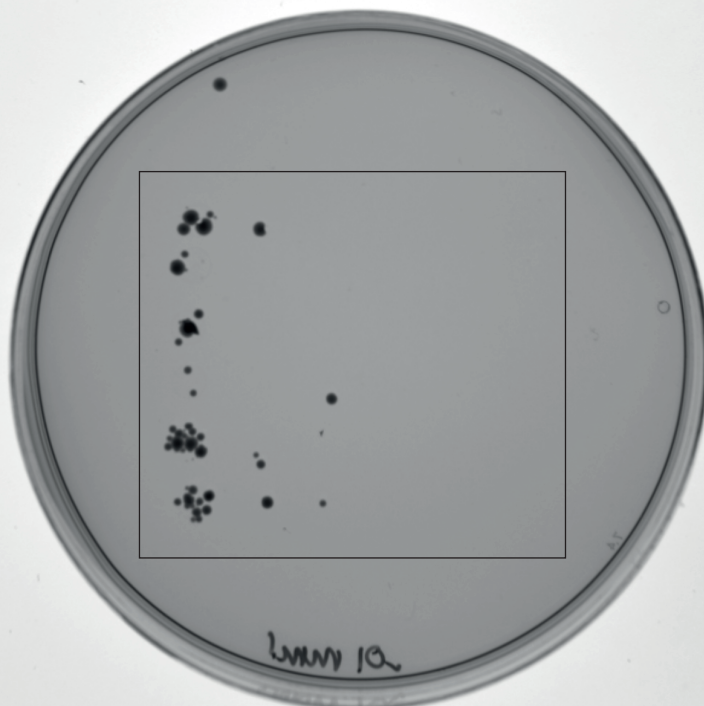

cropped area for Figure 7 -  
figure supplement 1  
bottom (4-day) 0.01% MMS

---

Figure 7 - figure supplement 1 - source data 6.pdf  
2048 x 2816



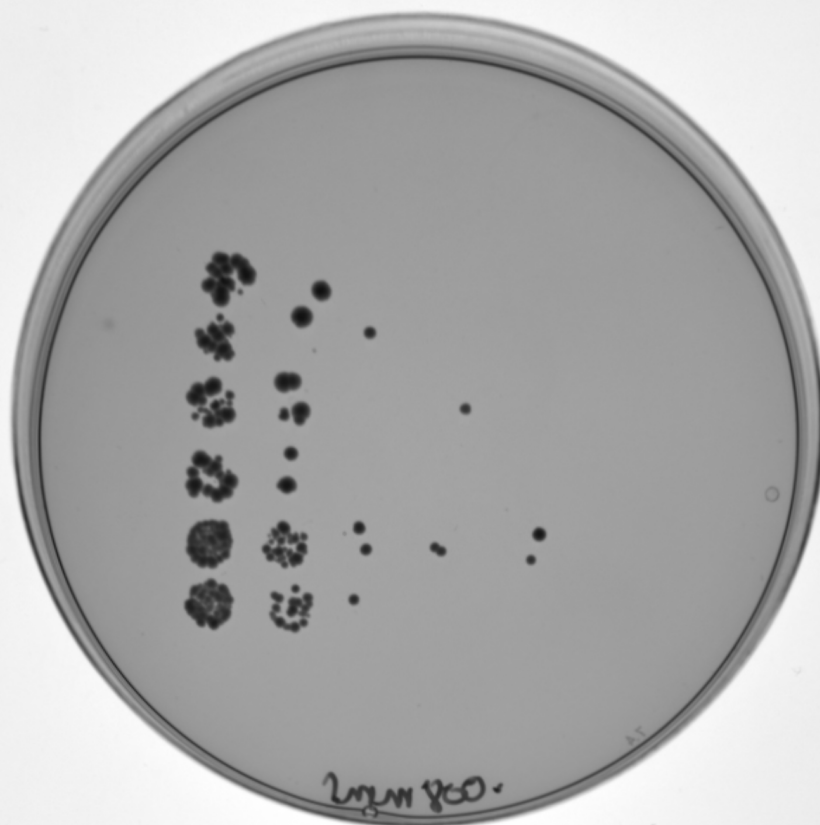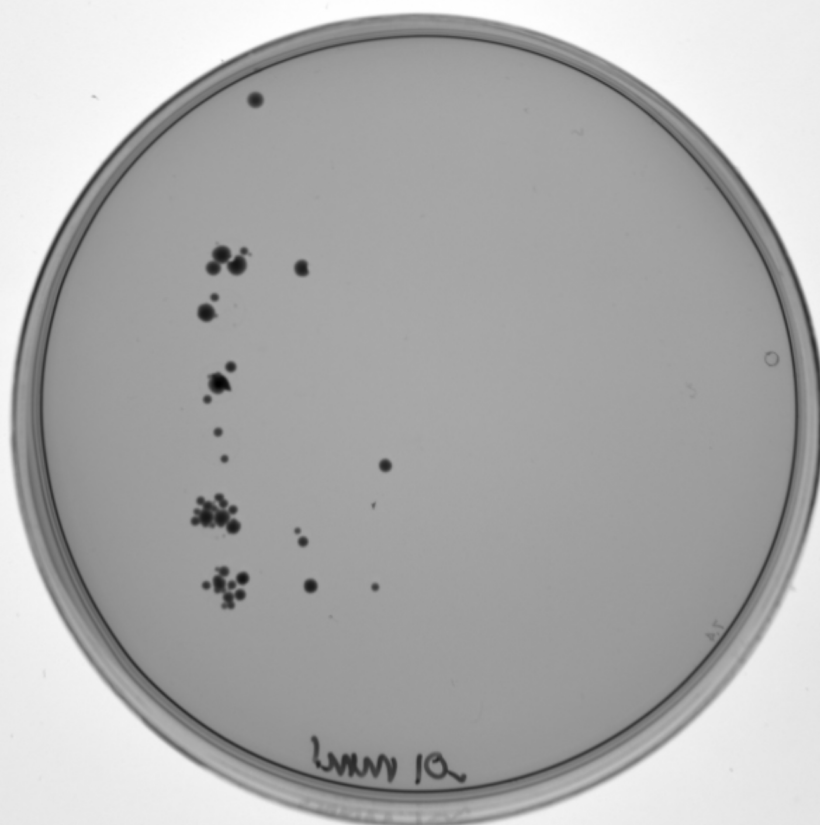

Supplement: fig7-figsupp1-data1 [file elife-69726-fig7-figsupp1-data1-v2.pdf]
