# Supplementary material for: Rad53 checkpoint kinase regulation of DNA replication fork rate via Mrc1 phosphorylation
Source: eLife journal article supplement (doi:10.7554/elife.69726), 2021-08-13

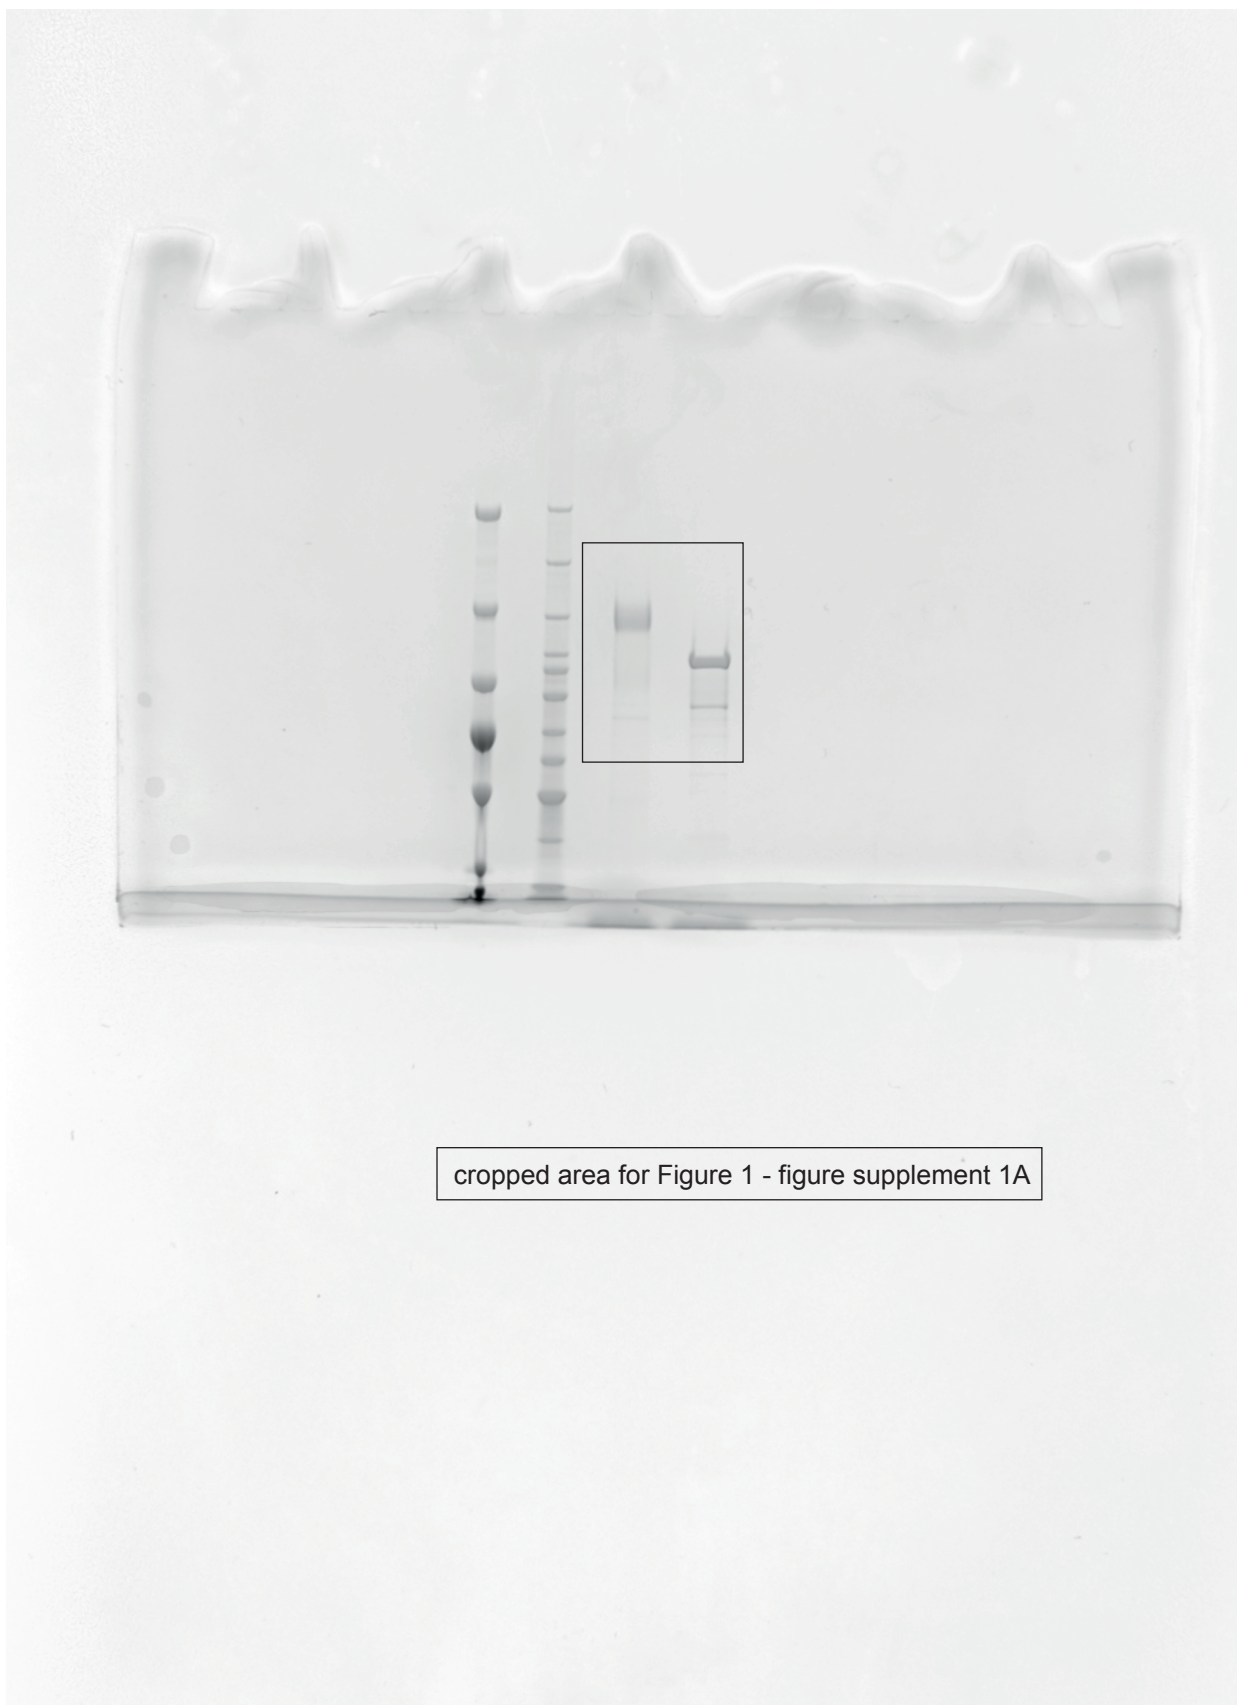

---

Figure 1 - figure supplement 1 - source data 1.pdf  
2048 x 2816



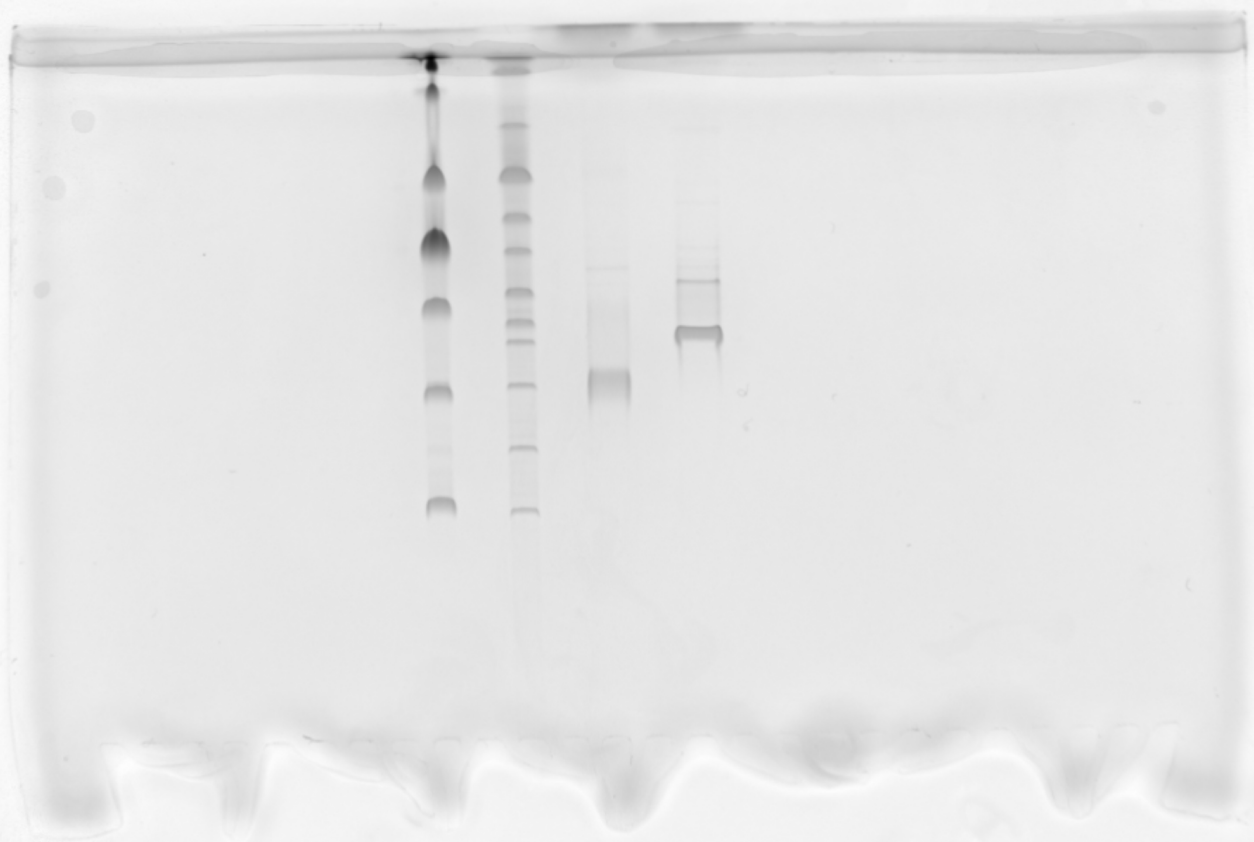

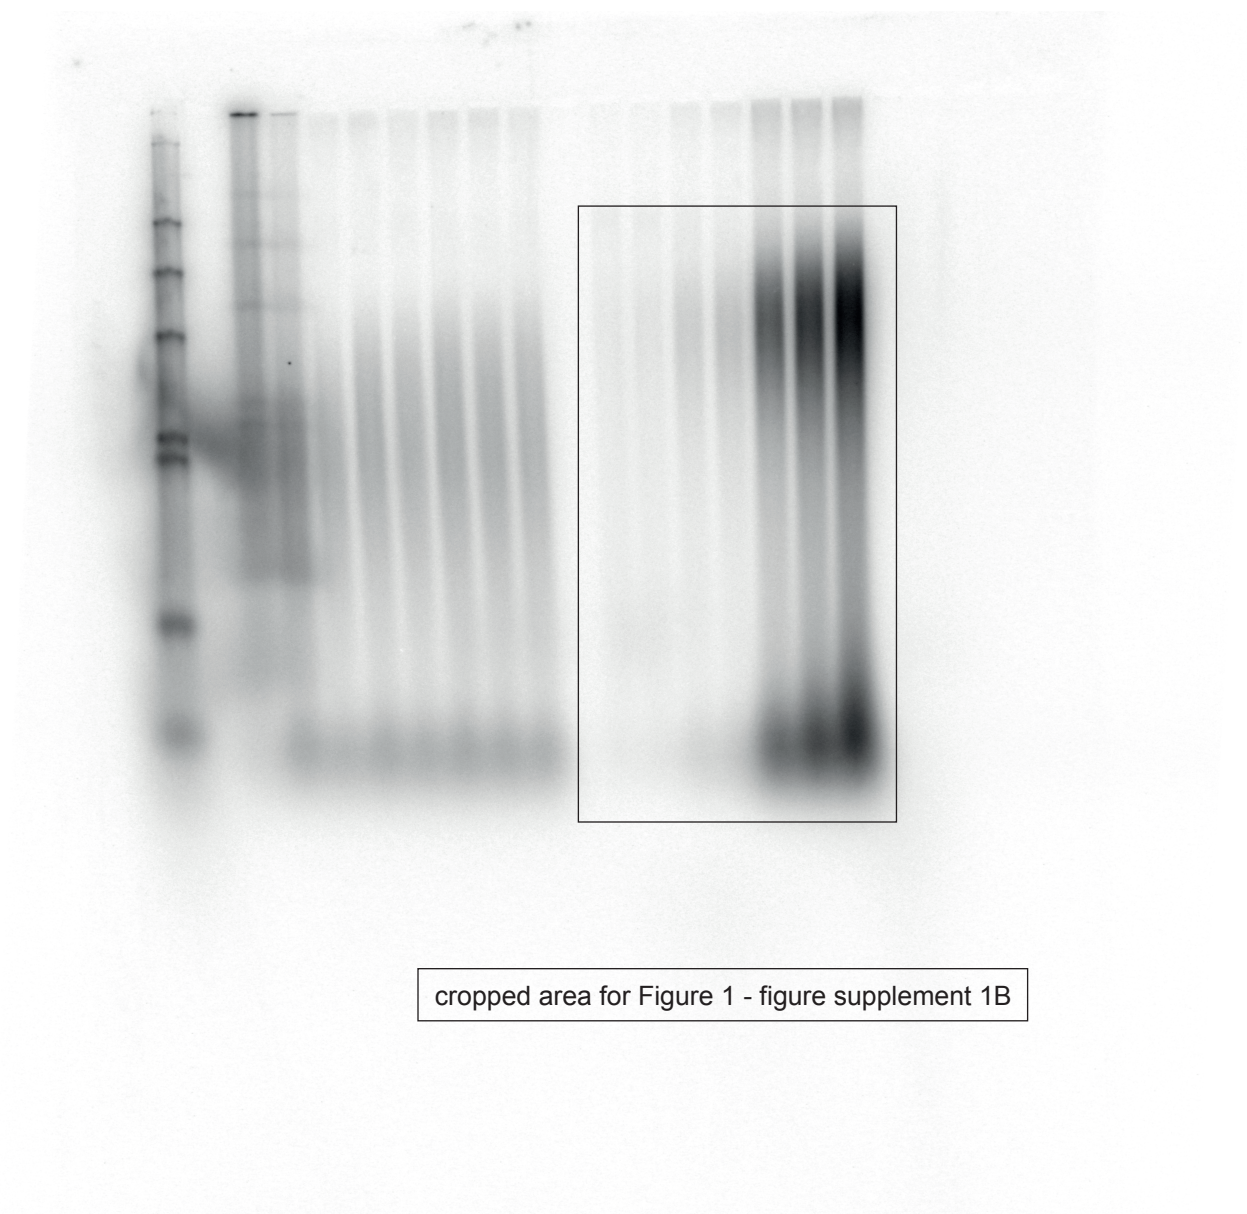

---

Figure 1 - figure supplement 1 - source data 2.pdf  
5000 x 4000

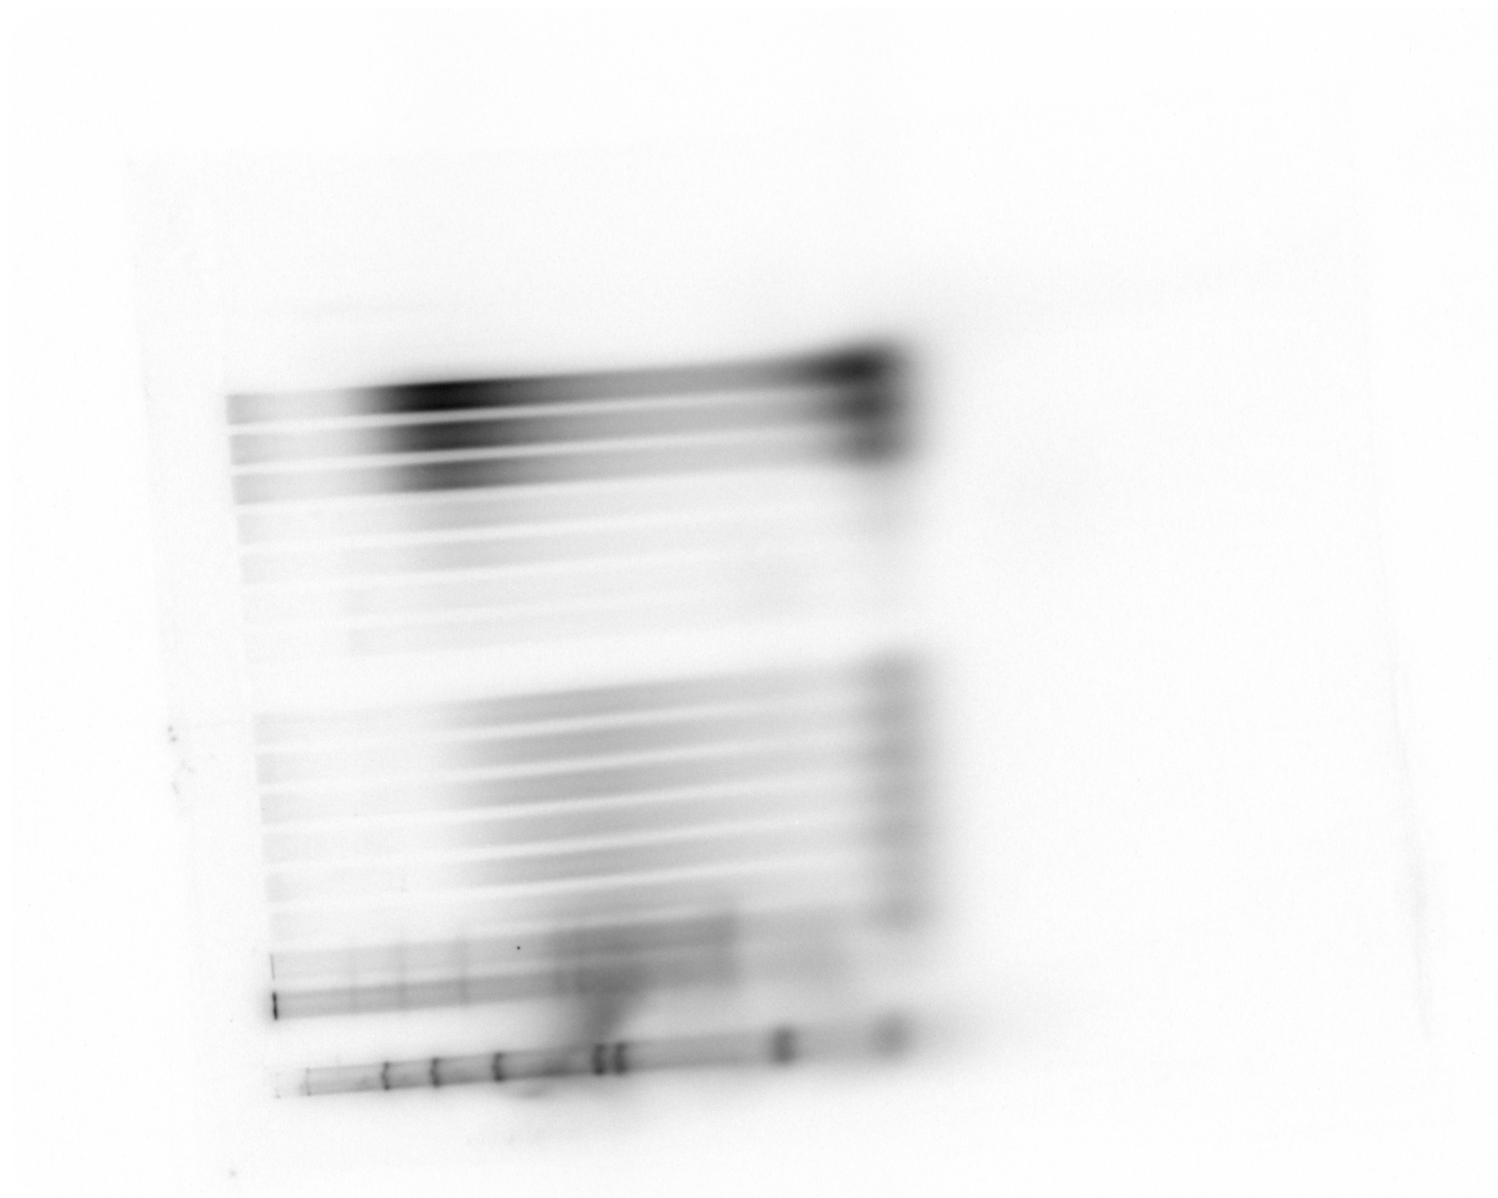

Supplement: fig1-figsupp1-data1 [file elife-69726-fig1-figsupp1-data1-v2.pdf]
