# Supplementary material for: Rad53 checkpoint kinase regulation of DNA replication fork rate via Mrc1 phosphorylation
Source: eLife journal article supplement (doi:10.7554/elife.69726), 2021-08-13

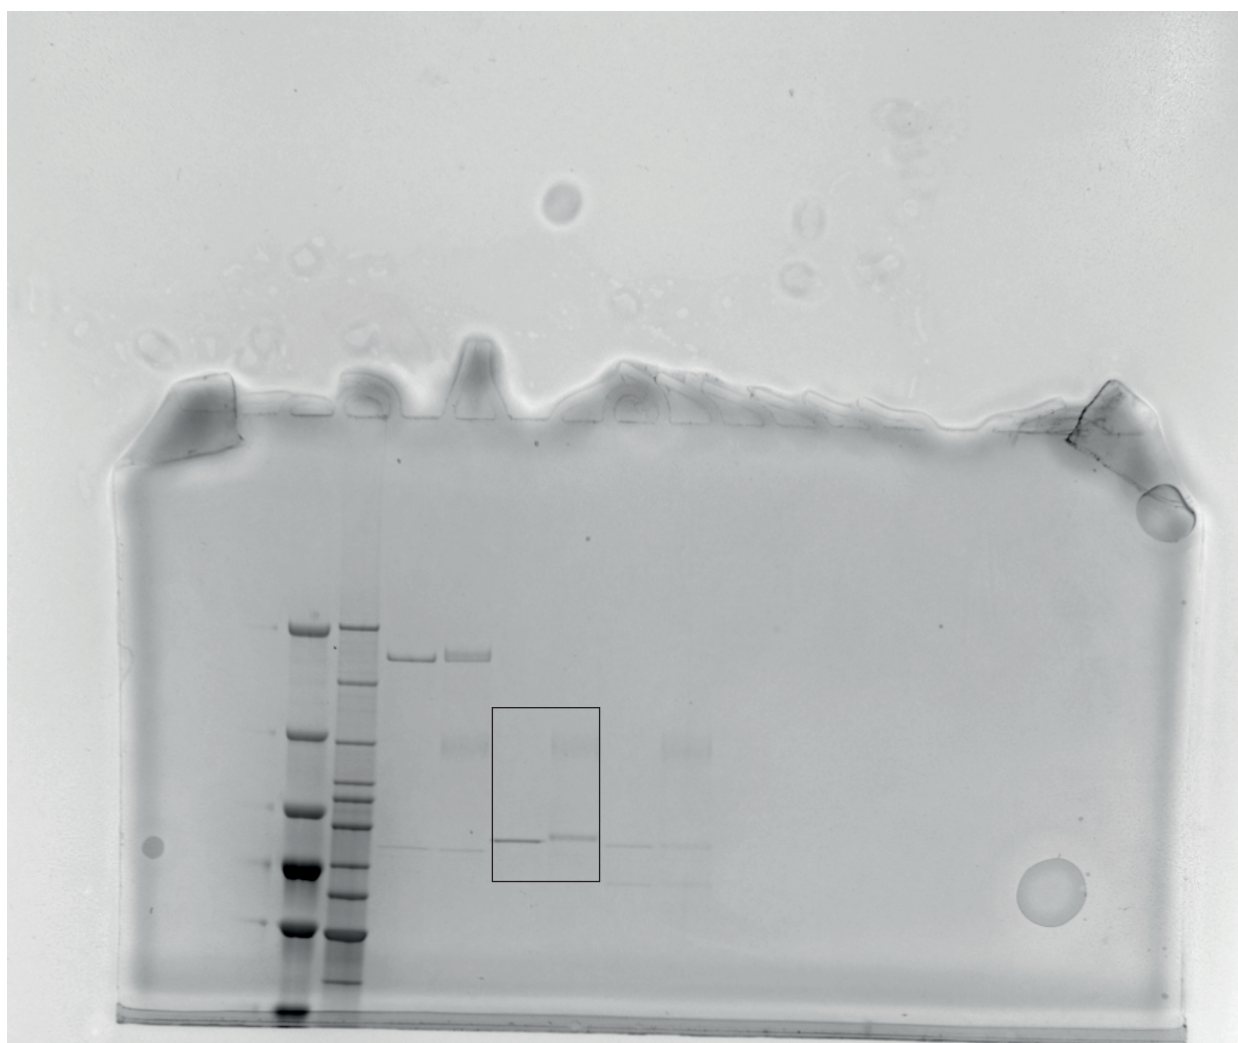

cropped area for Figure 3C

---

Figure 3 - source data 3.pdf  
2048 x 2816



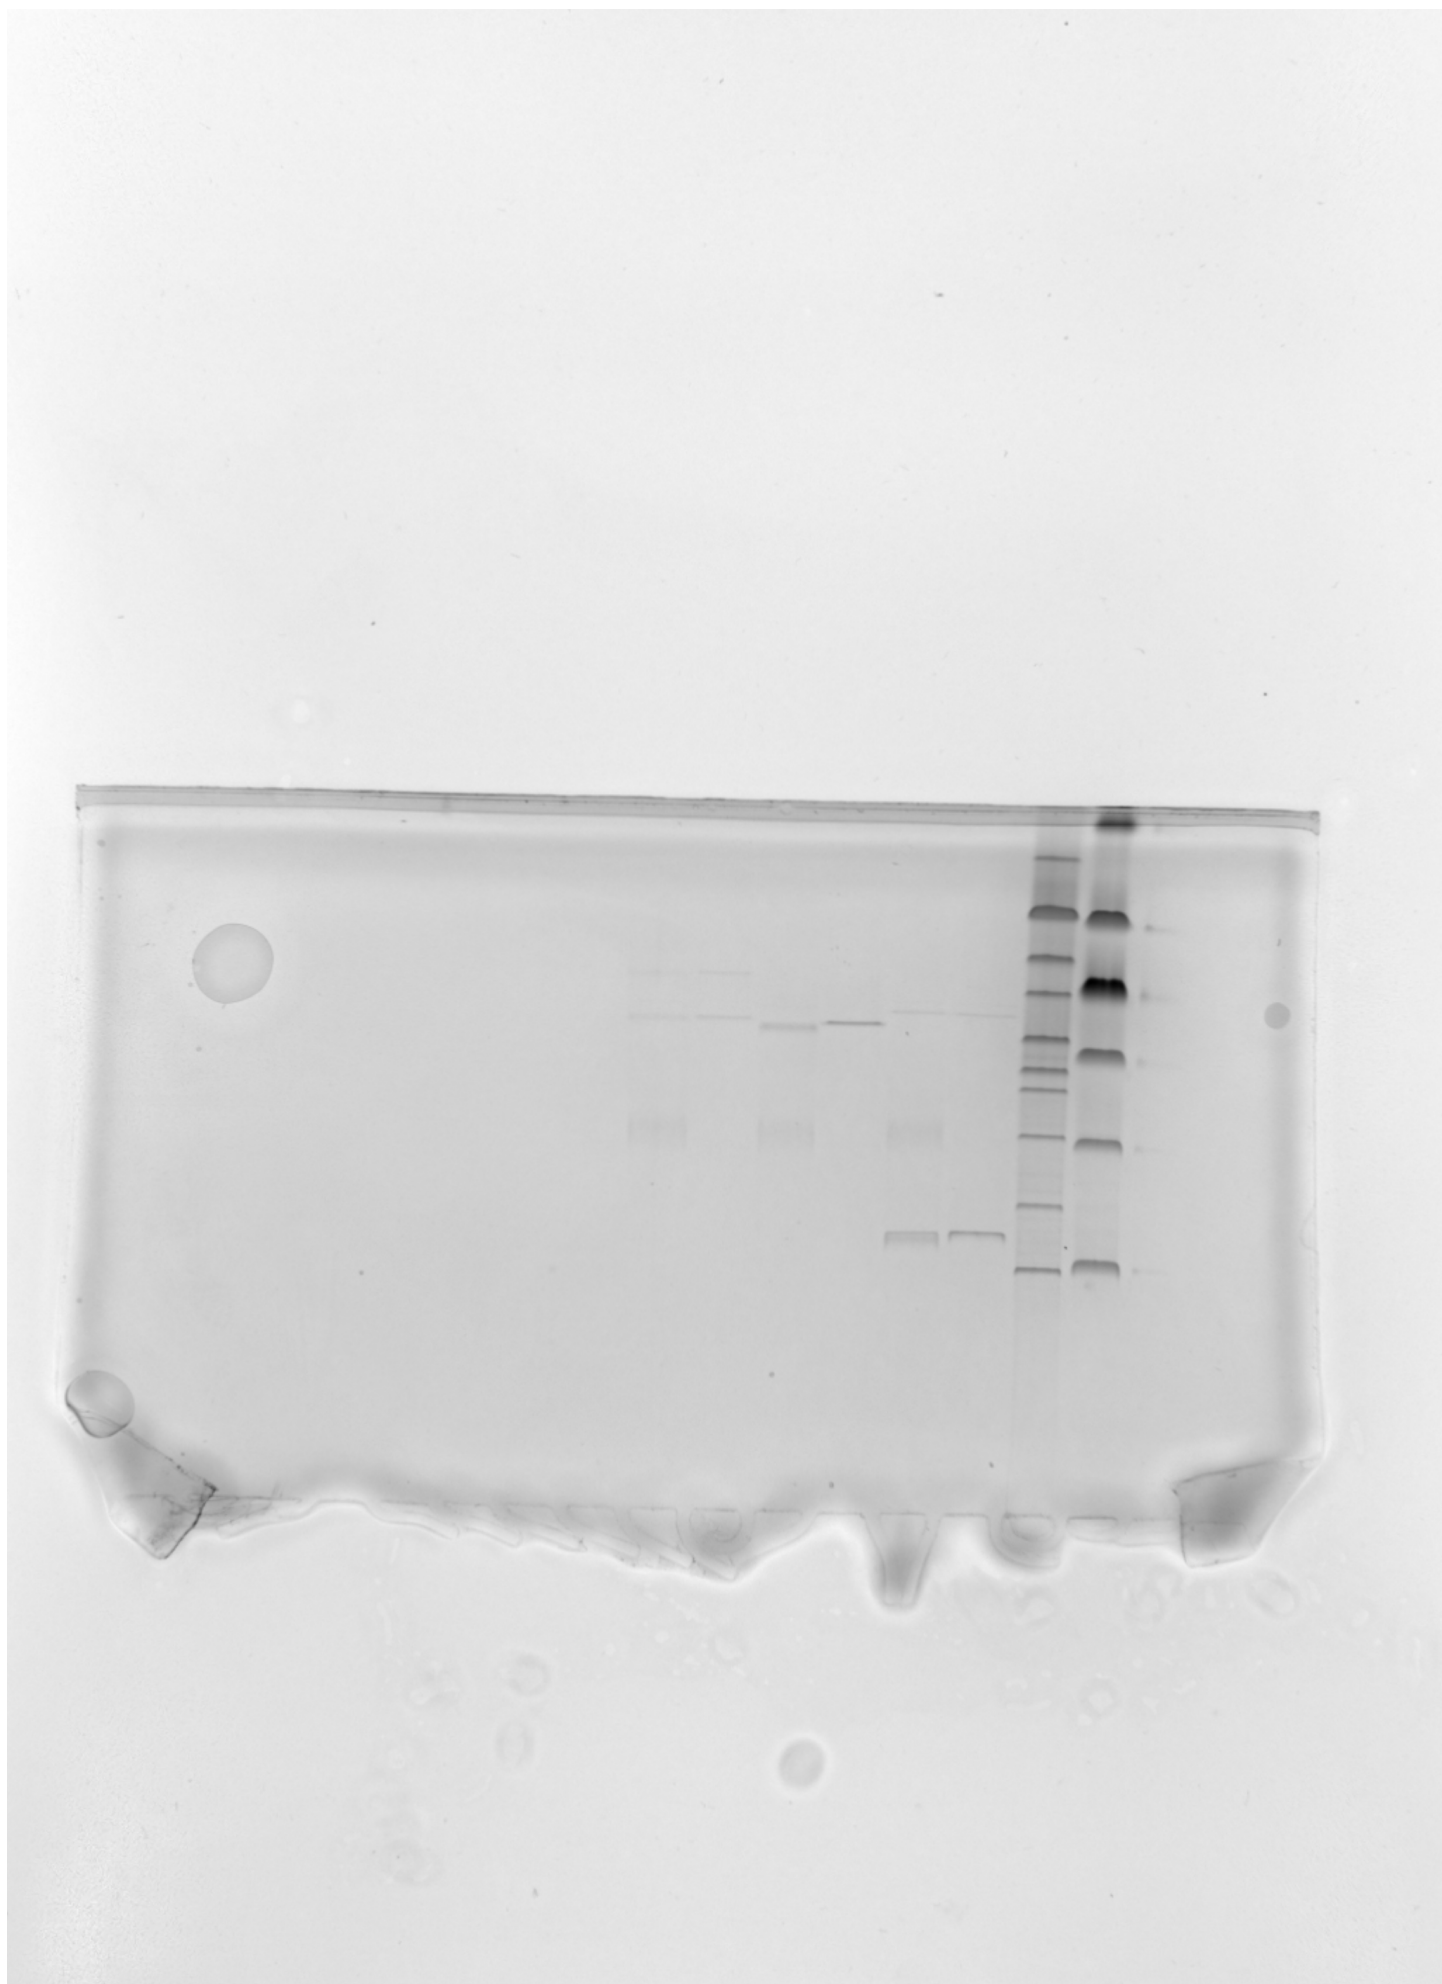

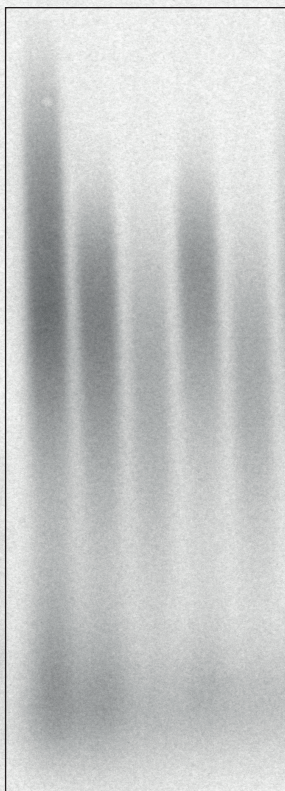

cropped area for Figure 3D



---

Figure 3 - source data 4.pdf  
5000 x 4000

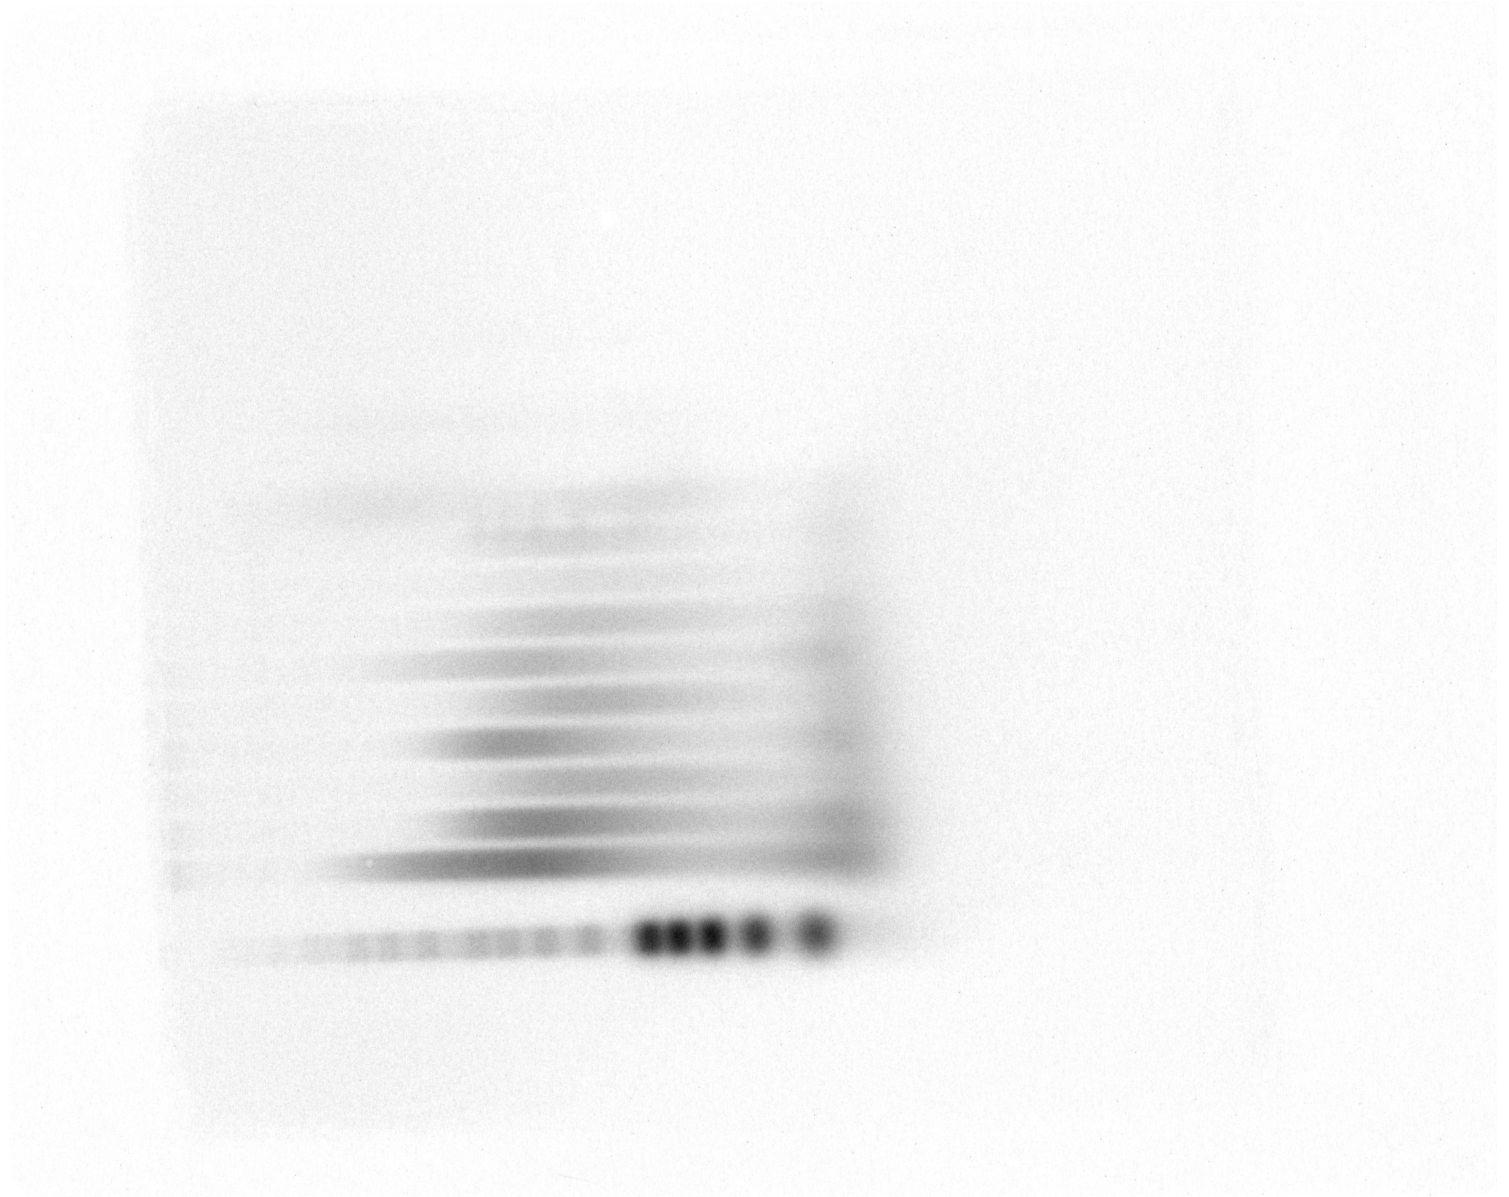



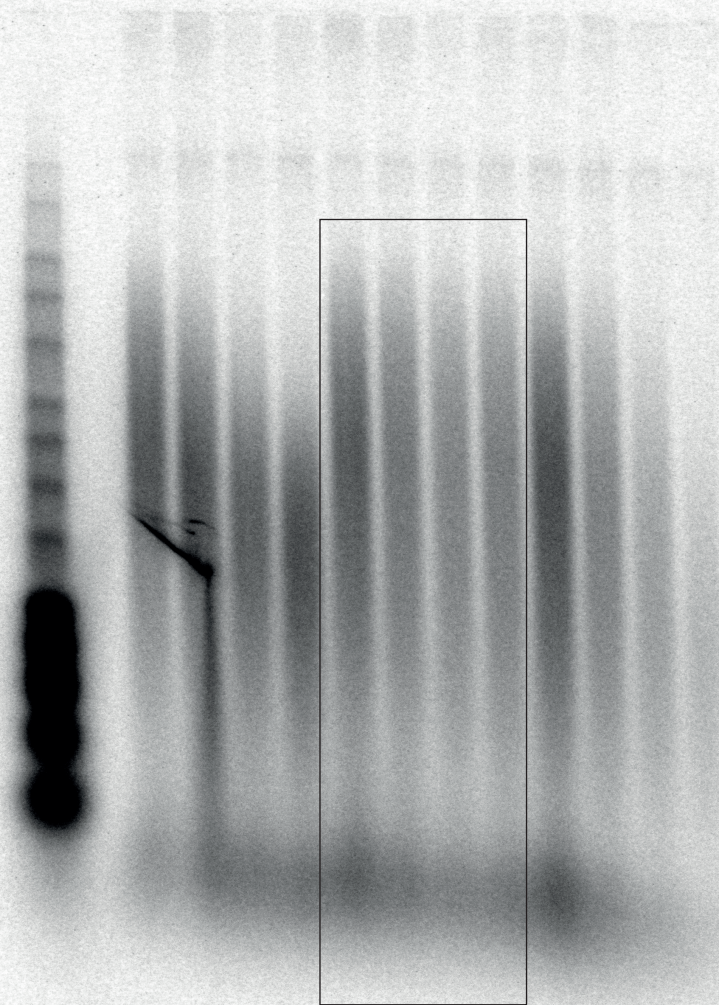

cropped area for Figure 3E



---

Figure 3 - source data 5.pdf  
5000 x 4000

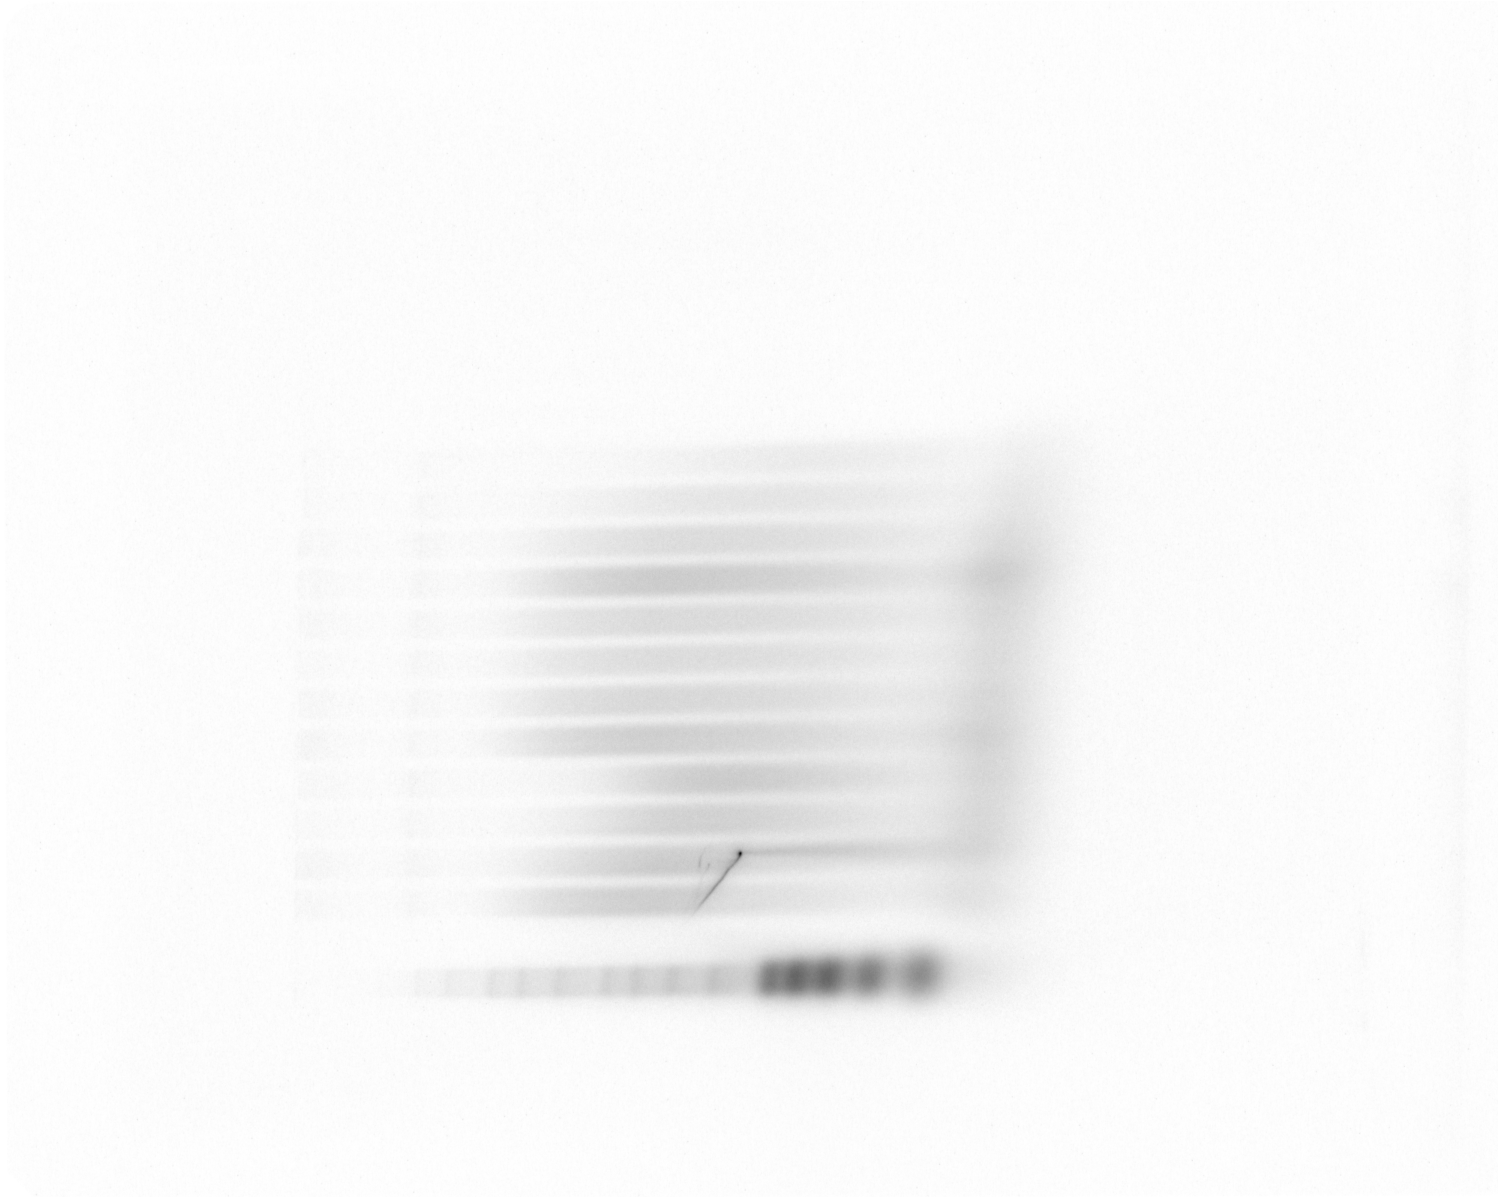

Supplement: fig3-data2 [file elife-69726-fig3-data2-v2.pdf]
