# Supplementary material for: Rad53 checkpoint kinase regulation of DNA replication fork rate via Mrc1 phosphorylation
Source: eLife journal article supplement (doi:10.7554/elife.69726), 2021-08-13

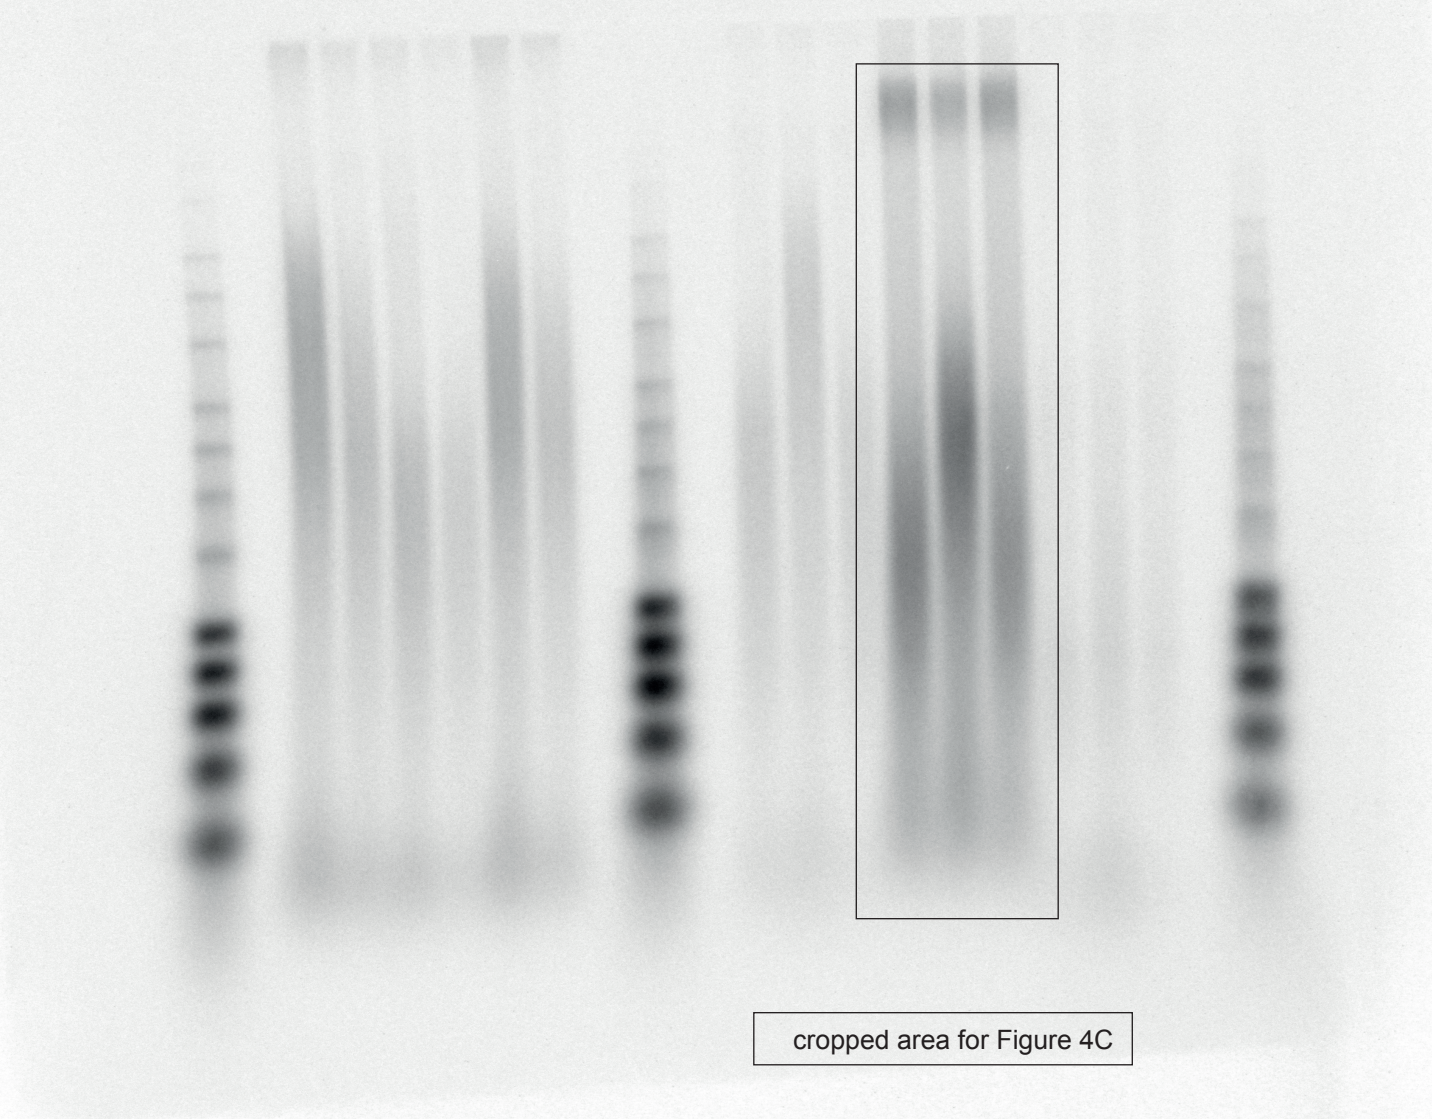



---

Figure 4 - source data 3.pdf  
5000 x 4000

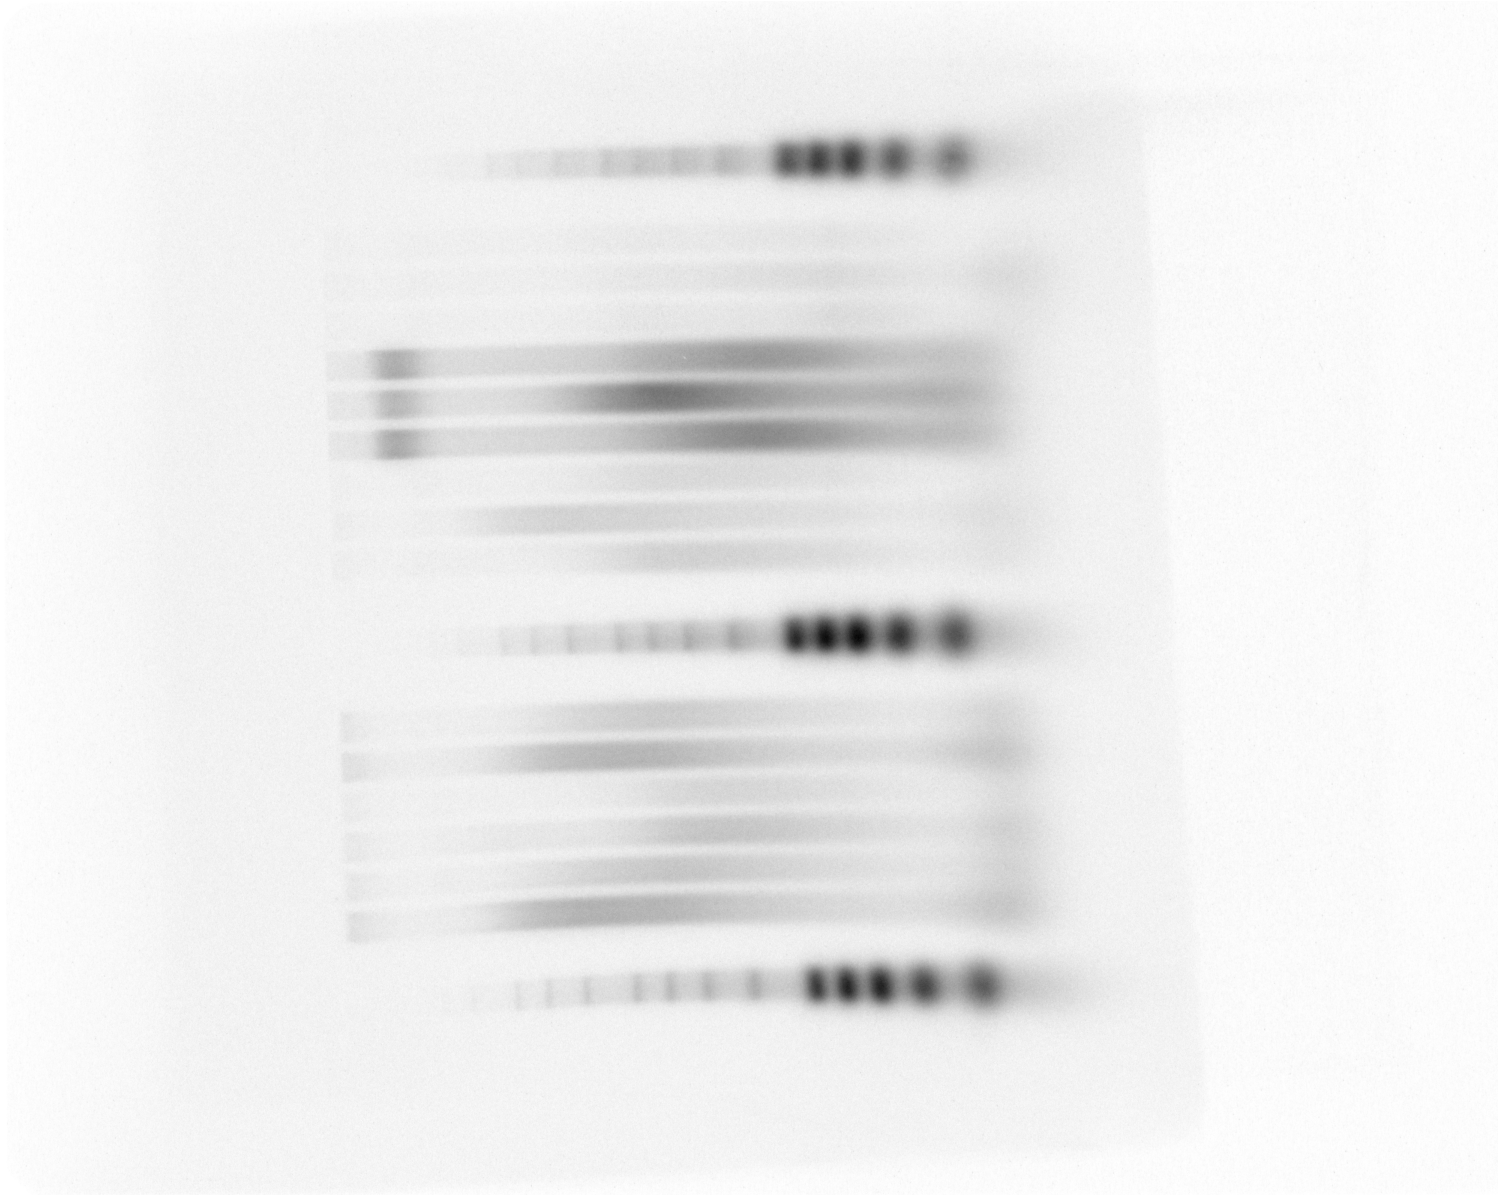

Supplement: fig4-data2 [file elife-69726-fig4-data2-v2.pdf]
