# Supplementary material for: Rad53 checkpoint kinase regulation of DNA replication fork rate via Mrc1 phosphorylation
Source: eLife journal article supplement (doi:10.7554/elife.69726), 2021-08-13

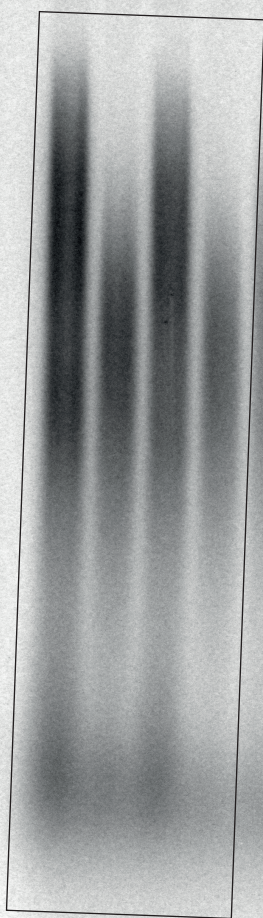

cropped area for Figure 5A



---

Figure 5 - source data 1.pdf  
5000 x 4000

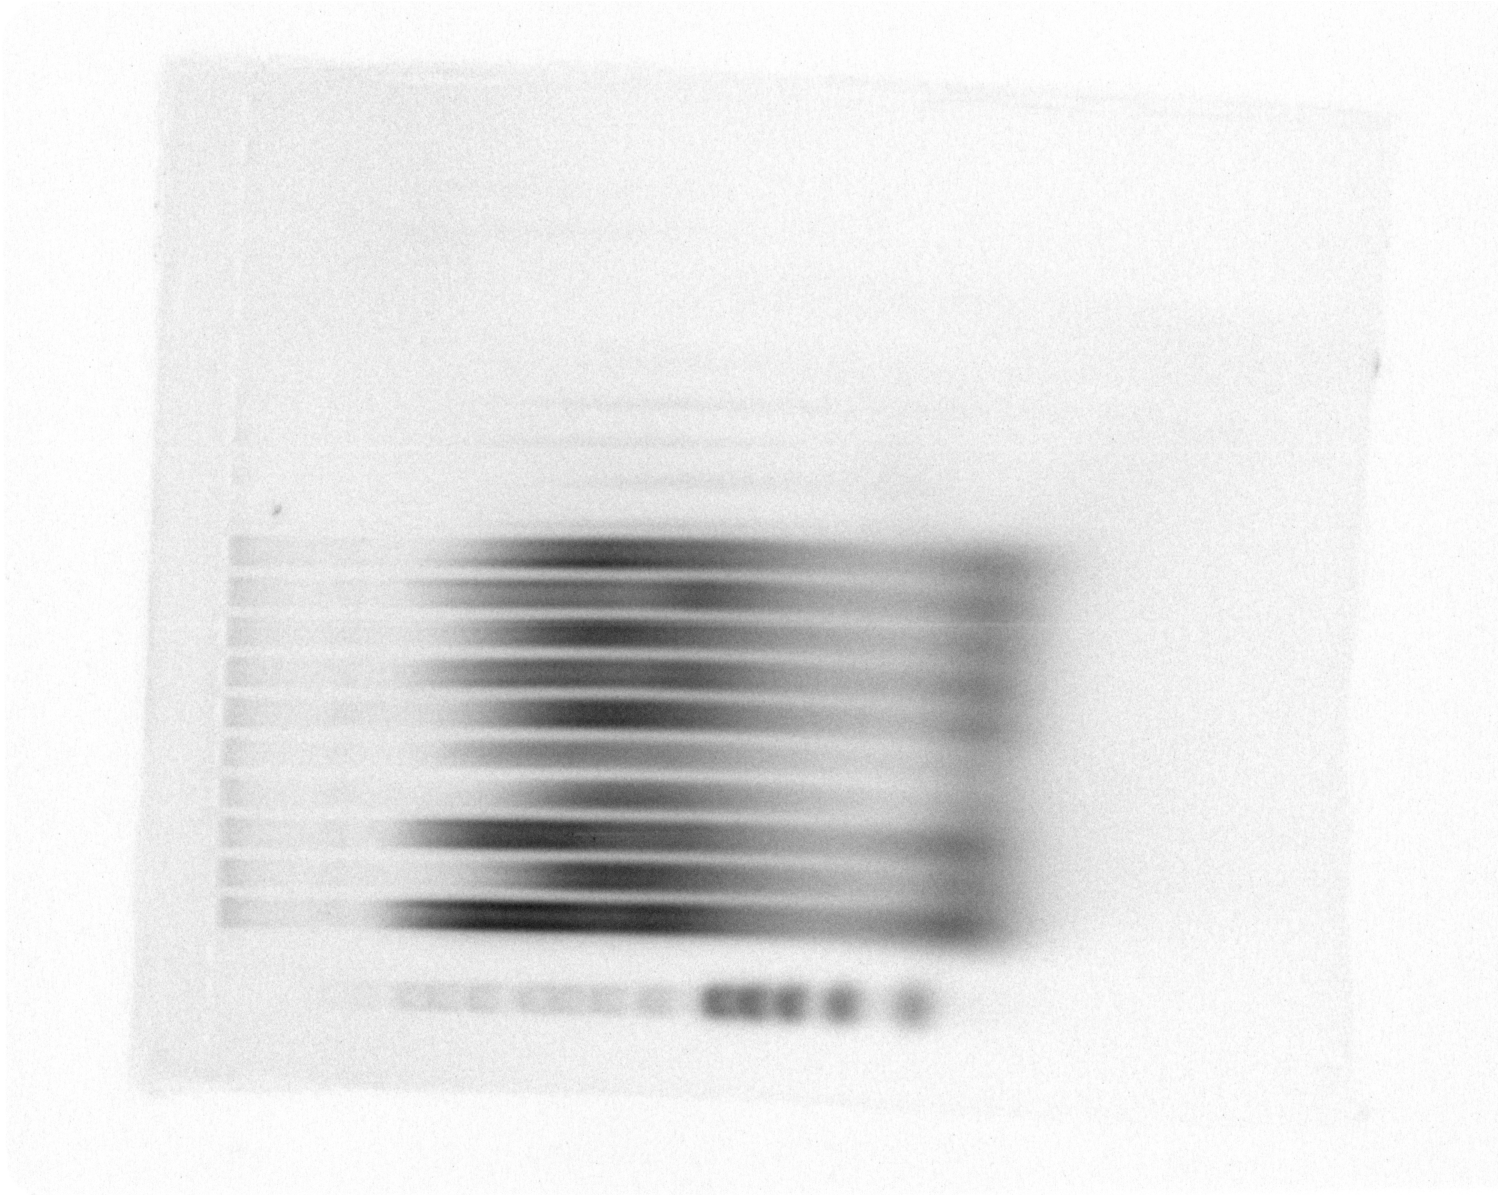



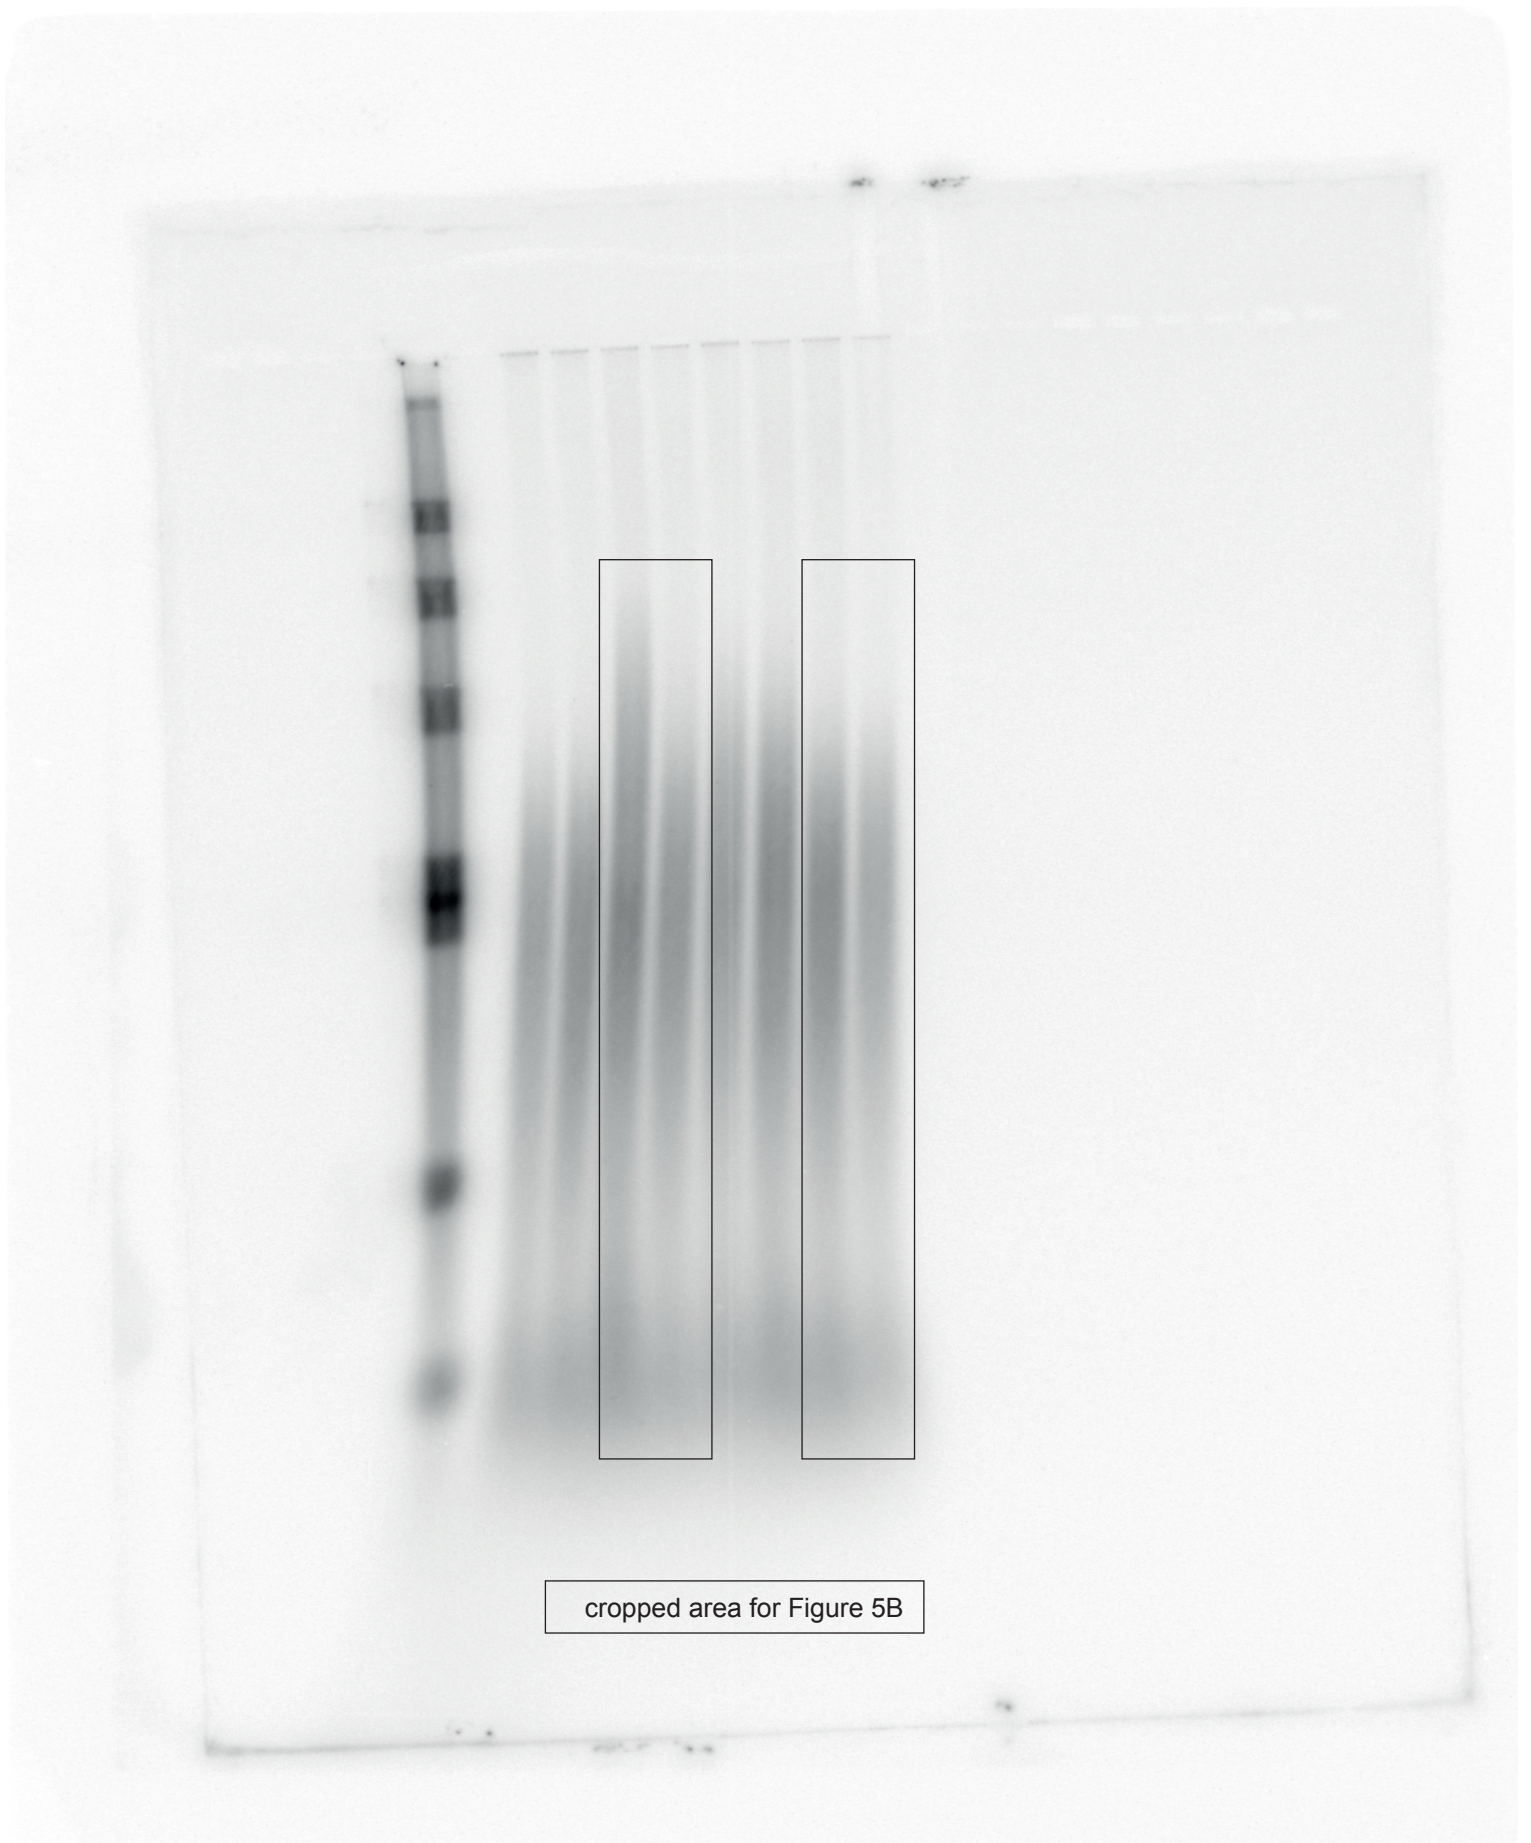

cropped area for Figure 5B



---

Figure 5 - source data 2.pdf  
5000 x 4000

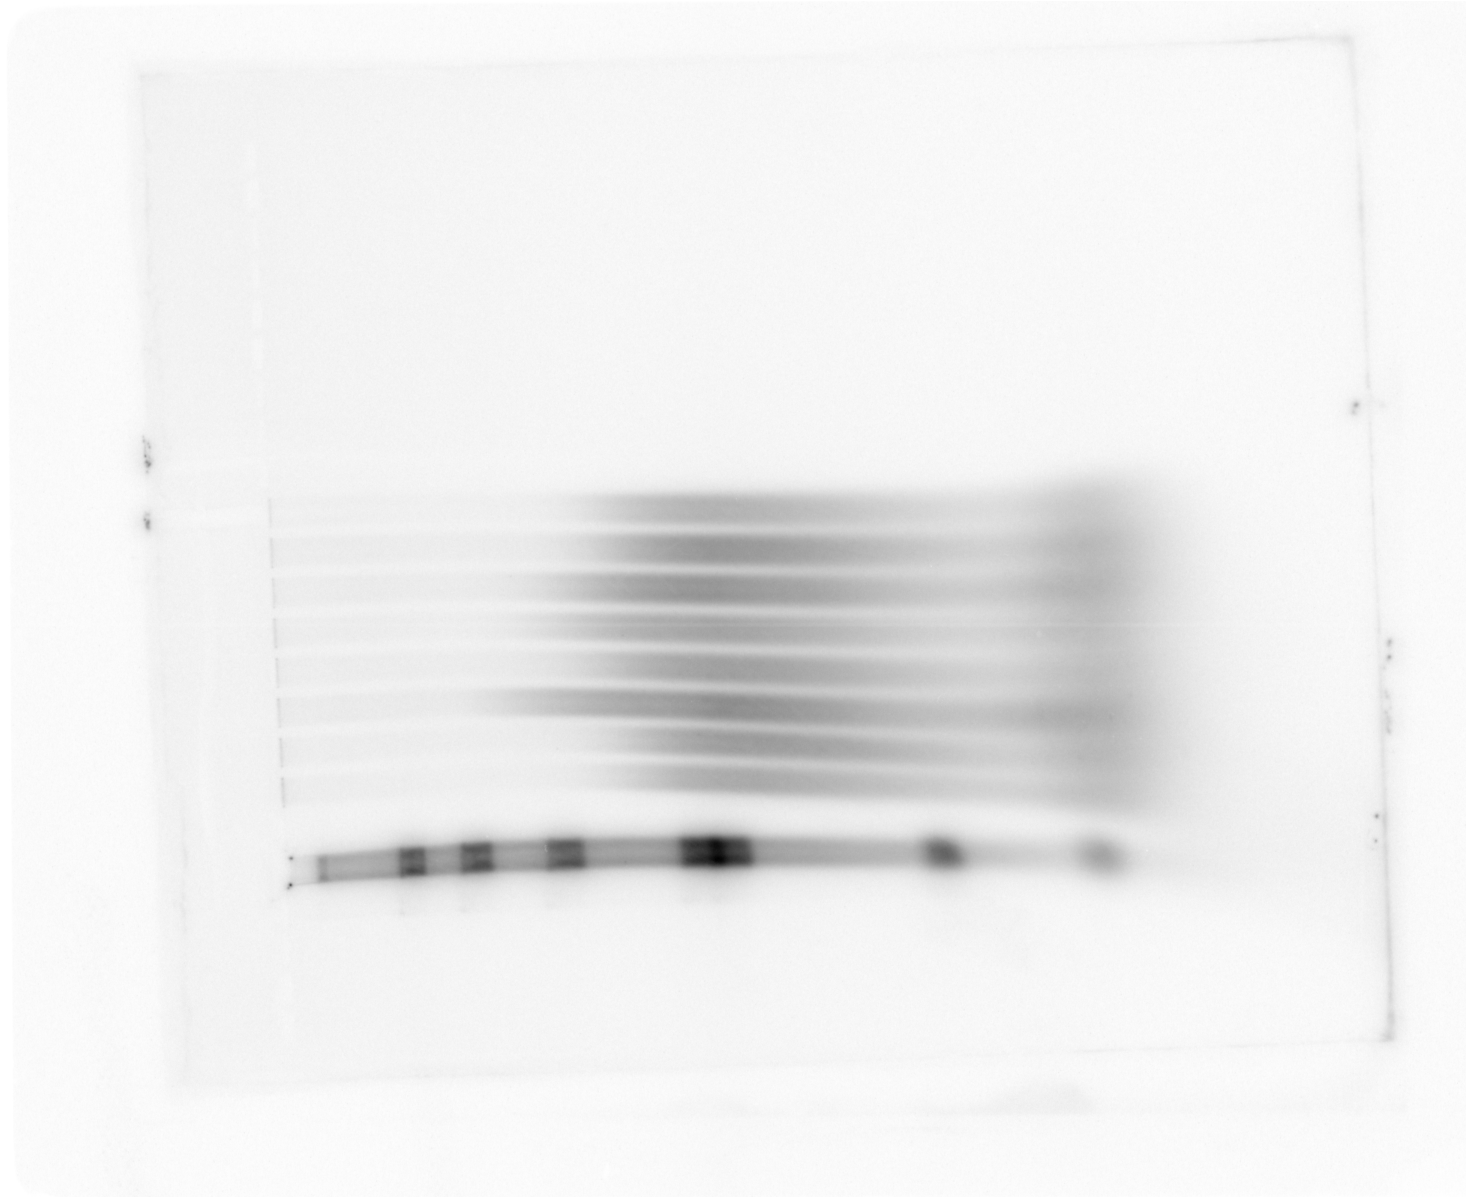



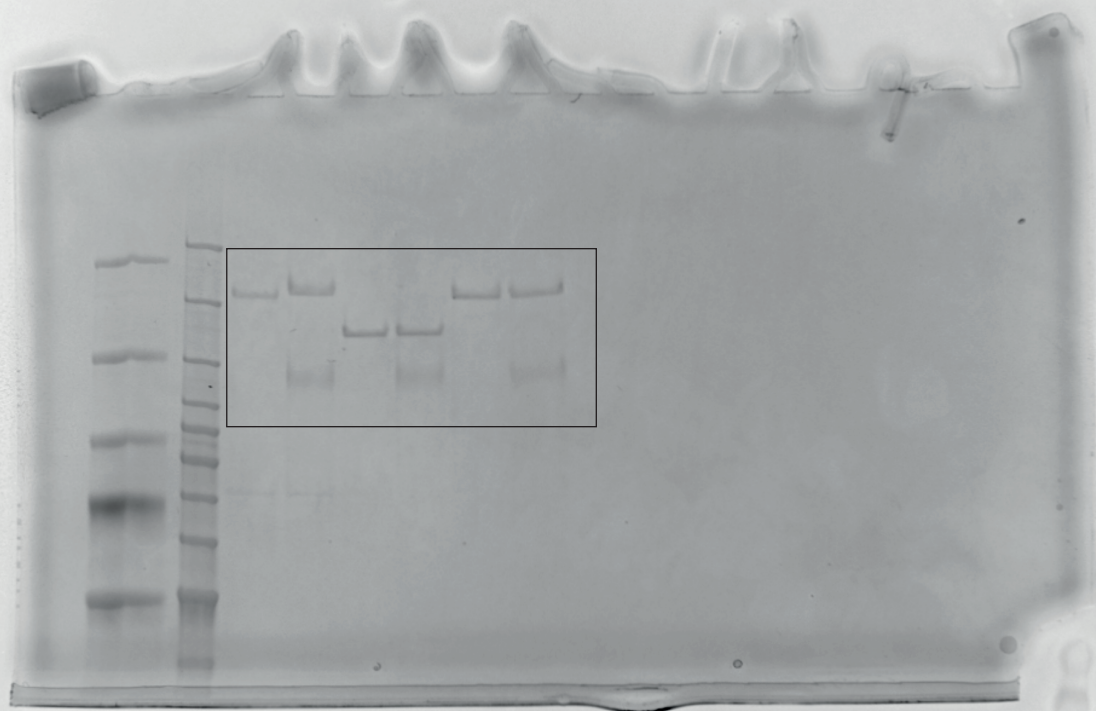

cropped area for Figure 5C



---

Figure 5 - source data 3.pdf  
2048 x 2816



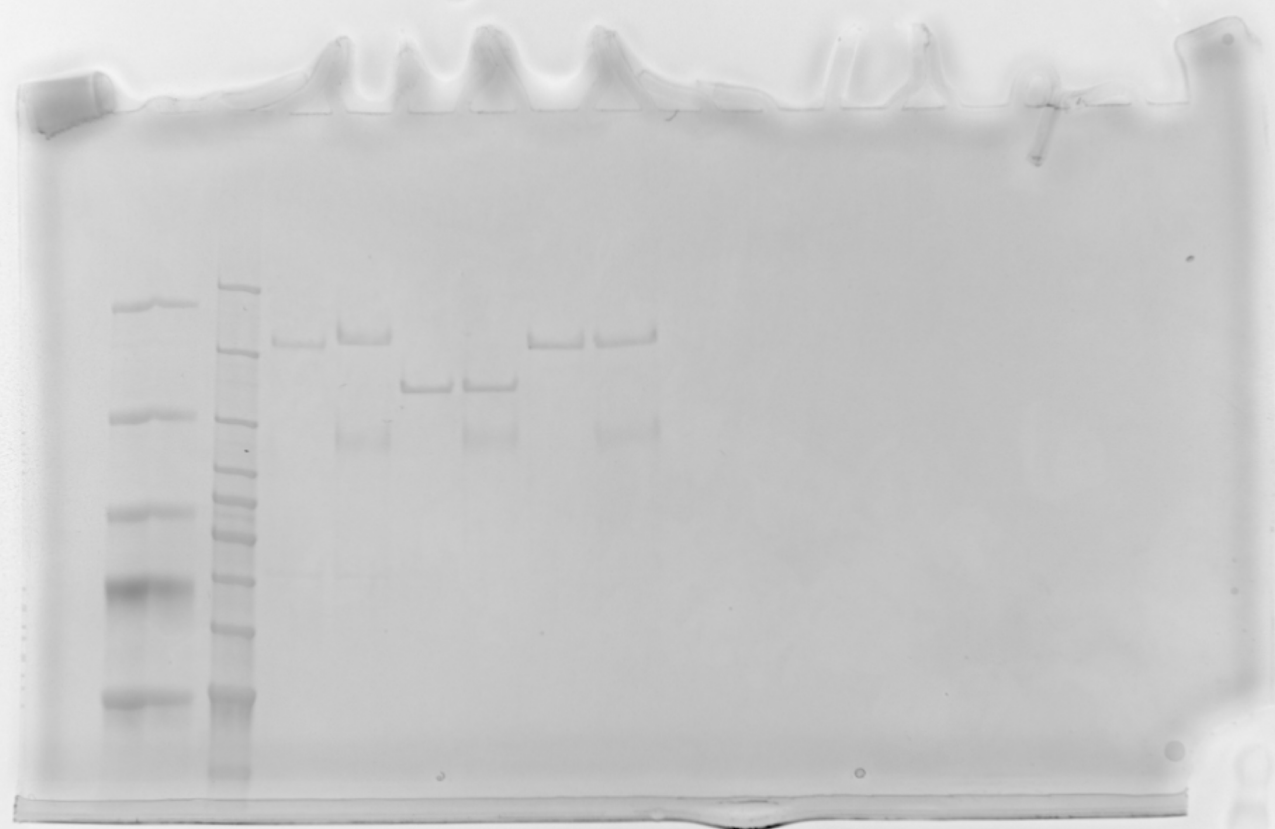

Supplement: fig5-data1 [file elife-69726-fig5-data1-v2.pdf]
