# Supplementary material for: Rad53 checkpoint kinase regulation of DNA replication fork rate via Mrc1 phosphorylation
Source: eLife journal article supplement (doi:10.7554/elife.69726), 2021-08-13

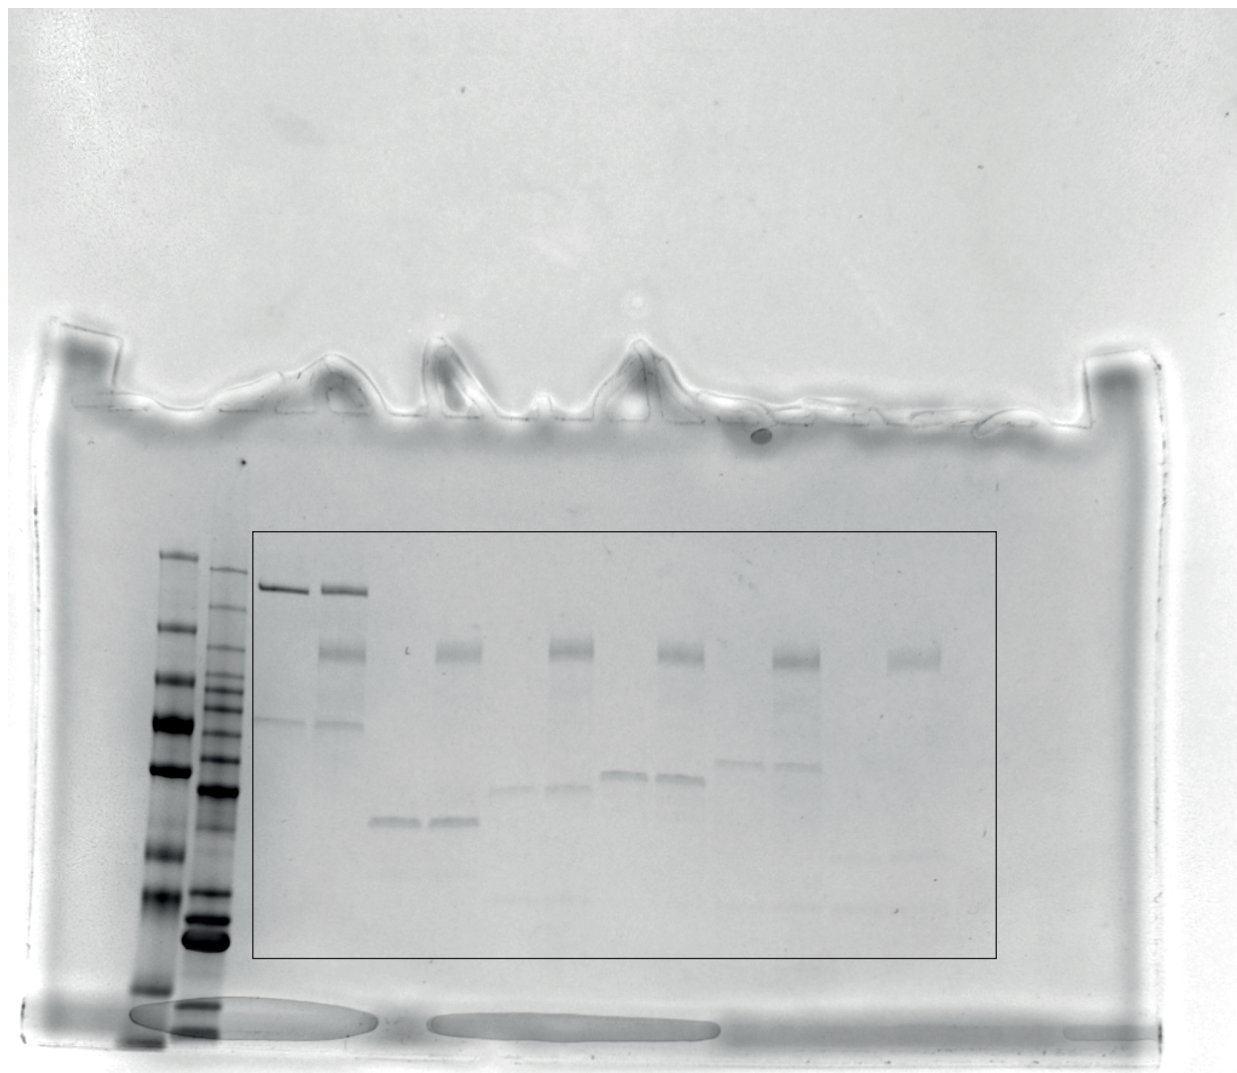

cropped area for Figure 5D top

---

Figure 5 - source data 4.pdf  
2048 x 2816



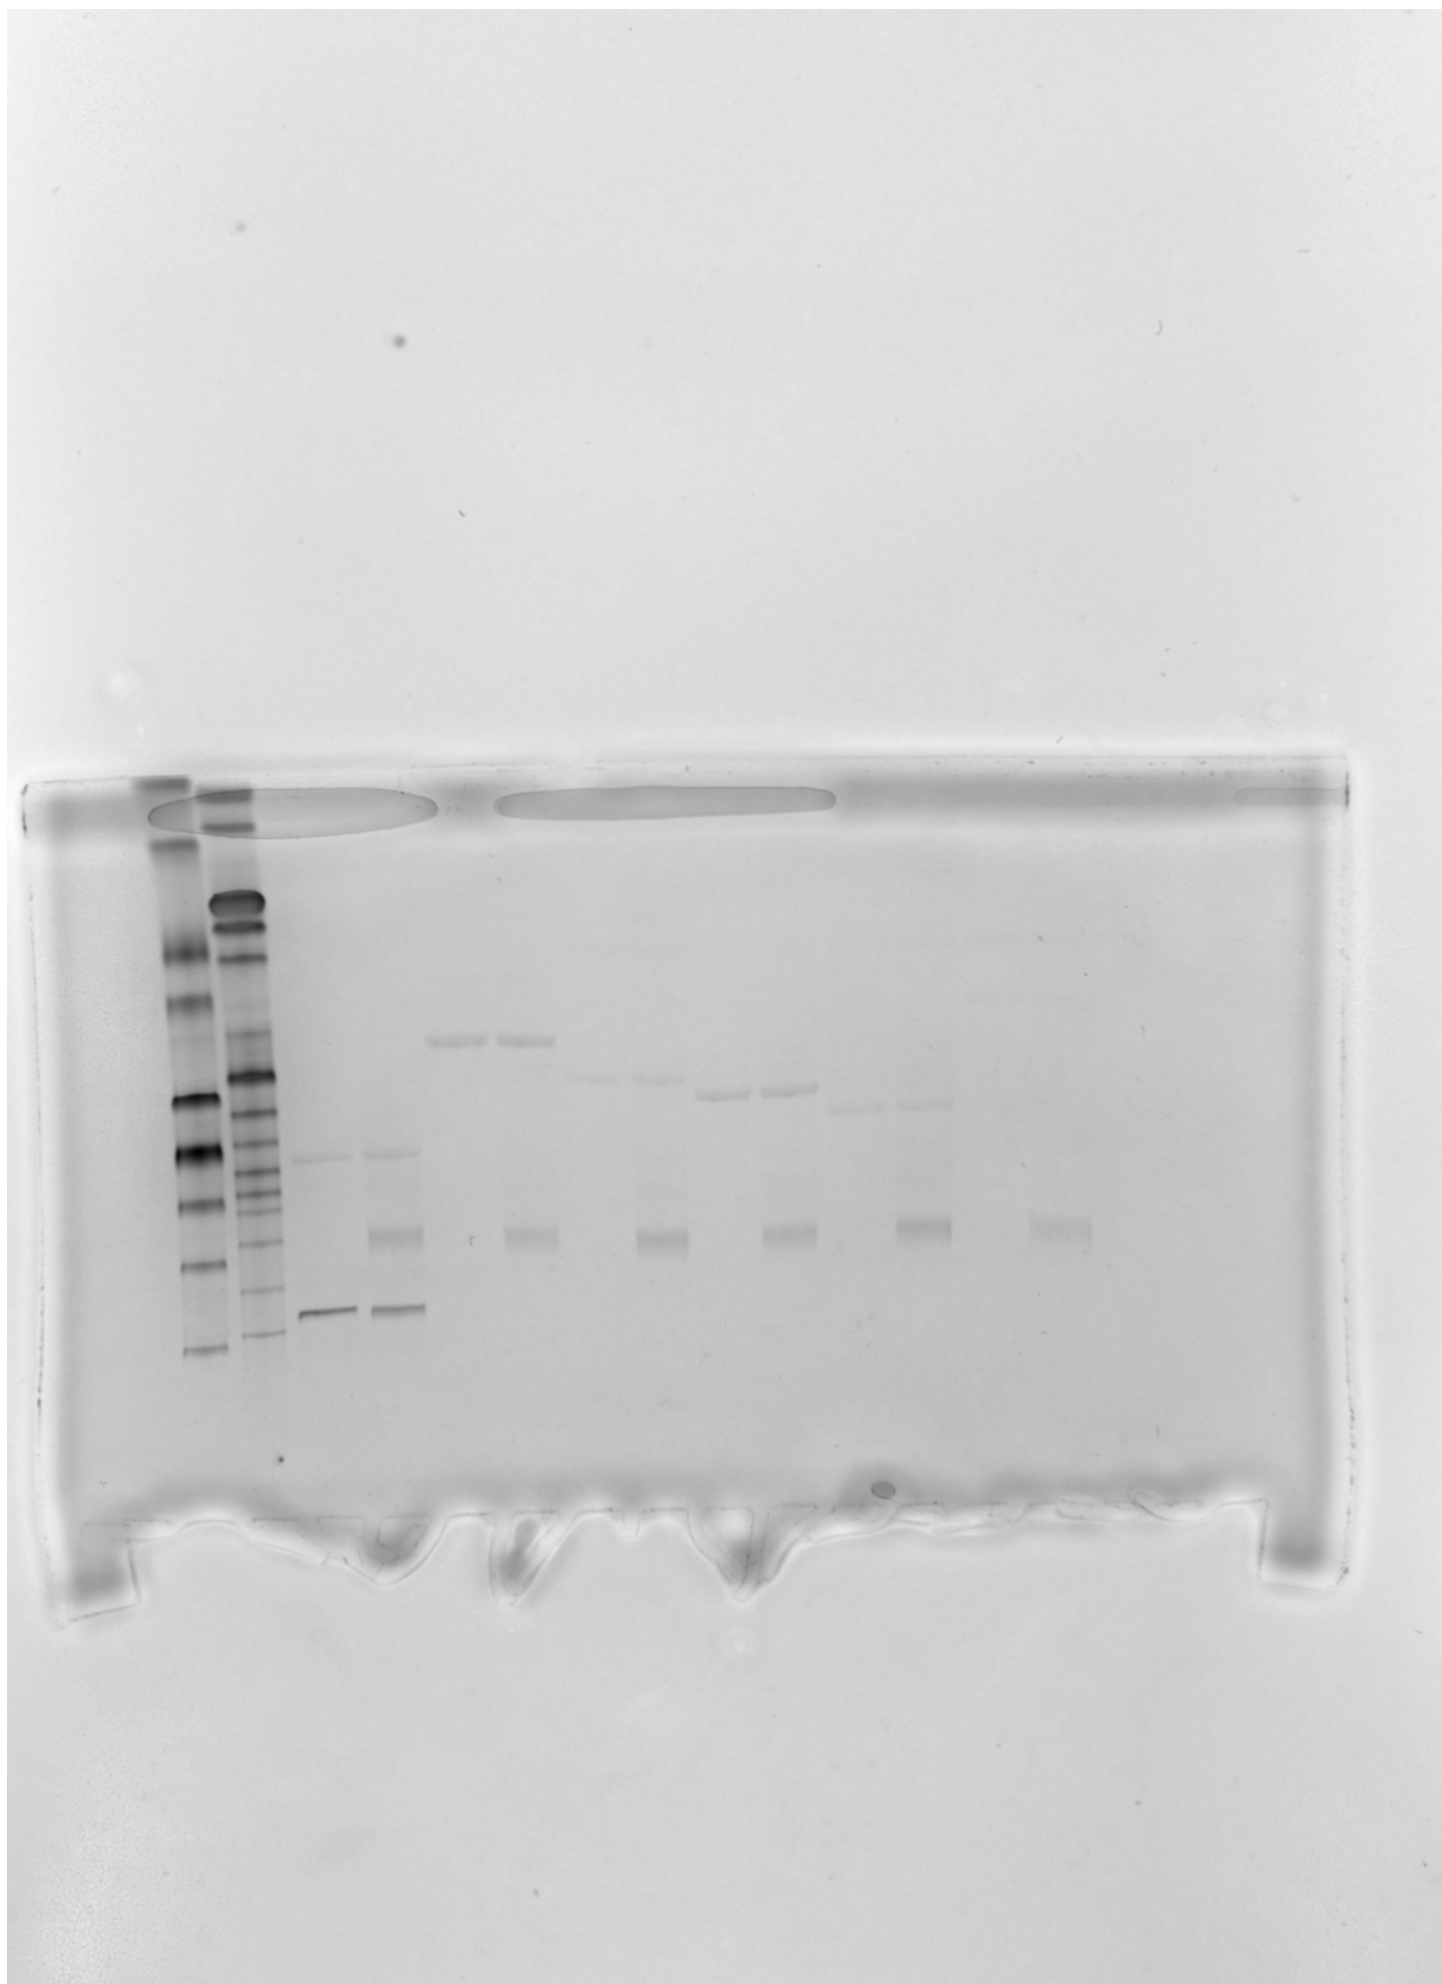

---

Figure 5 - source data 5.pdf  
5000 x 4000

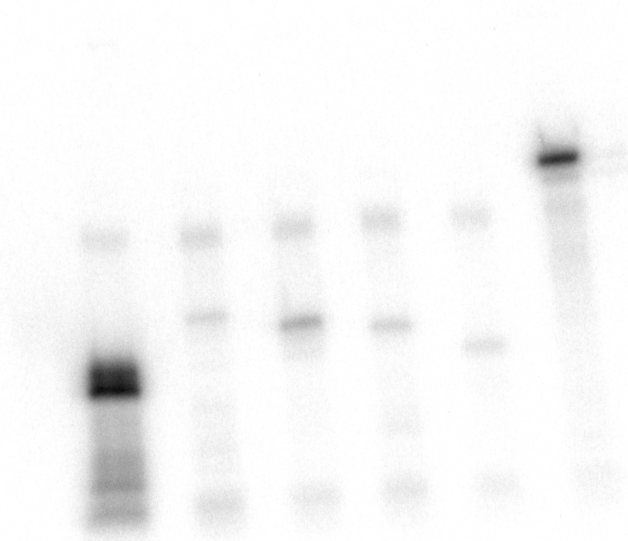

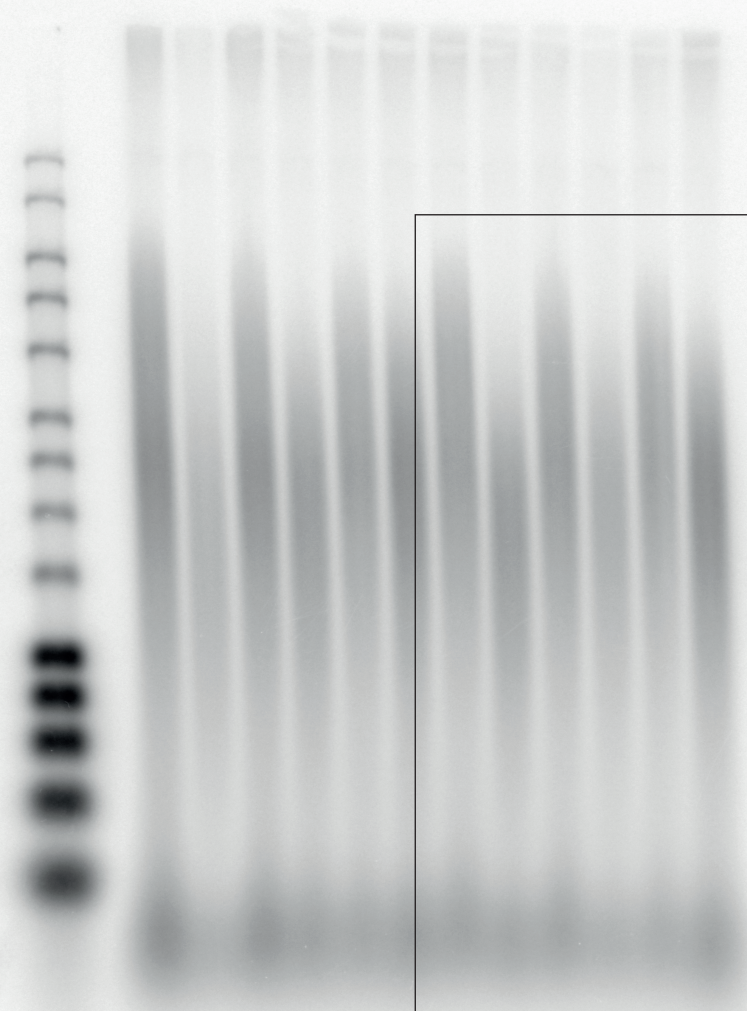

cropped area for Figure 5E



---

Figure 5 - source data 6.pdf  
5000 x 4000

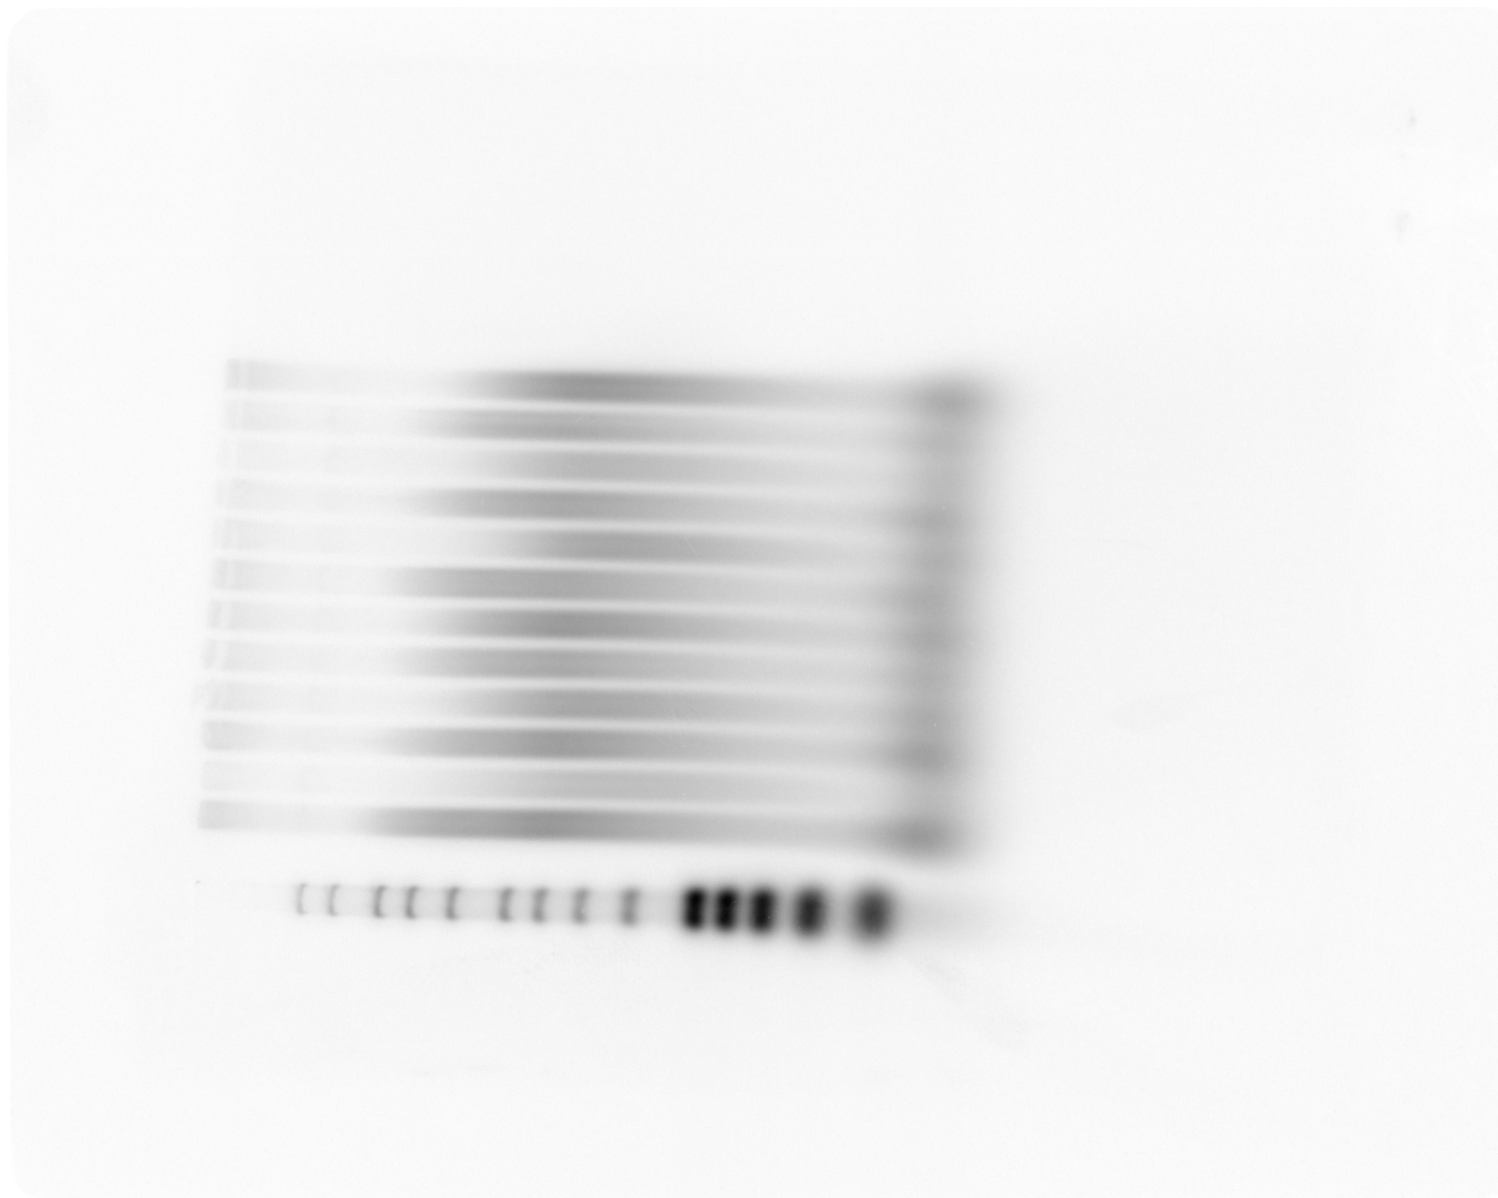

Supplement: fig5-data2 [file elife-69726-fig5-data2-v2.pdf]
