# Supplementary material for: Rad53 checkpoint kinase regulation of DNA replication fork rate via Mrc1 phosphorylation
Source: eLife journal article supplement (doi:10.7554/elife.69726), 2021-08-13

---

Figure 5 - figure supplement 1 - source data 2.pdf  
5000 x 4000

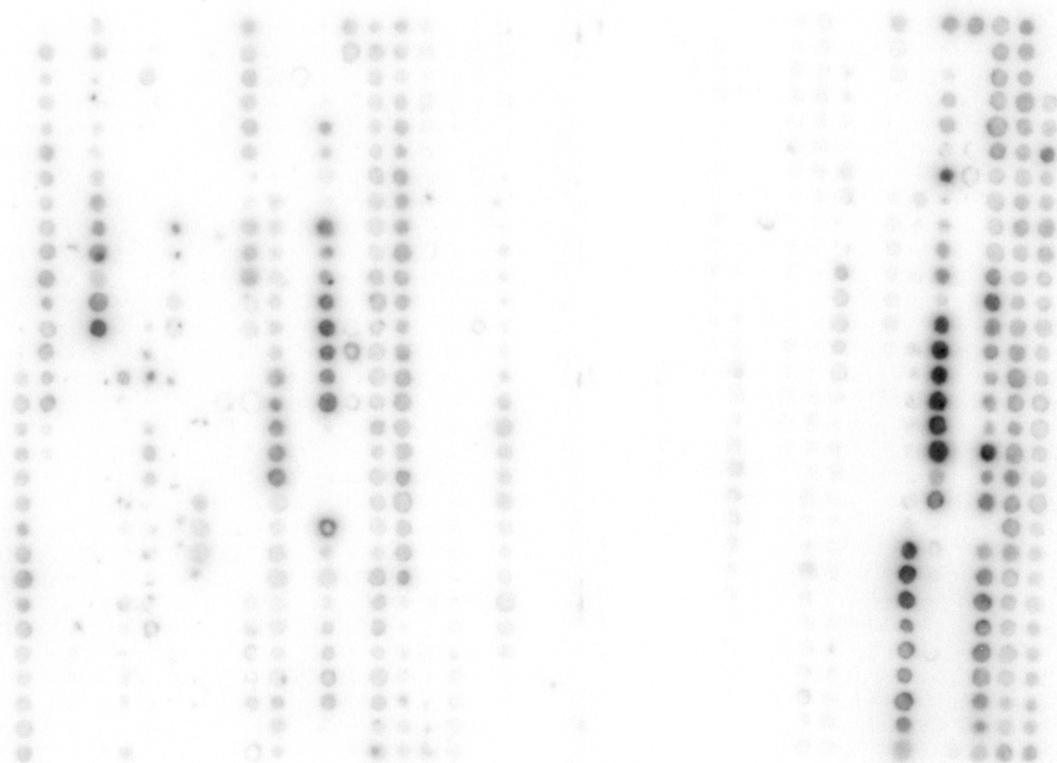

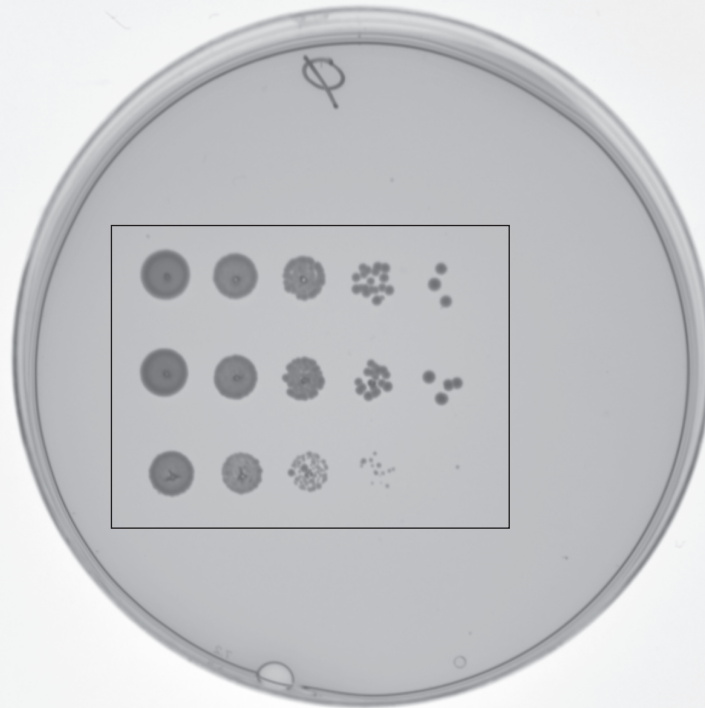

cropped area for Figure 5 -  
figure supplement 1C (YPD)

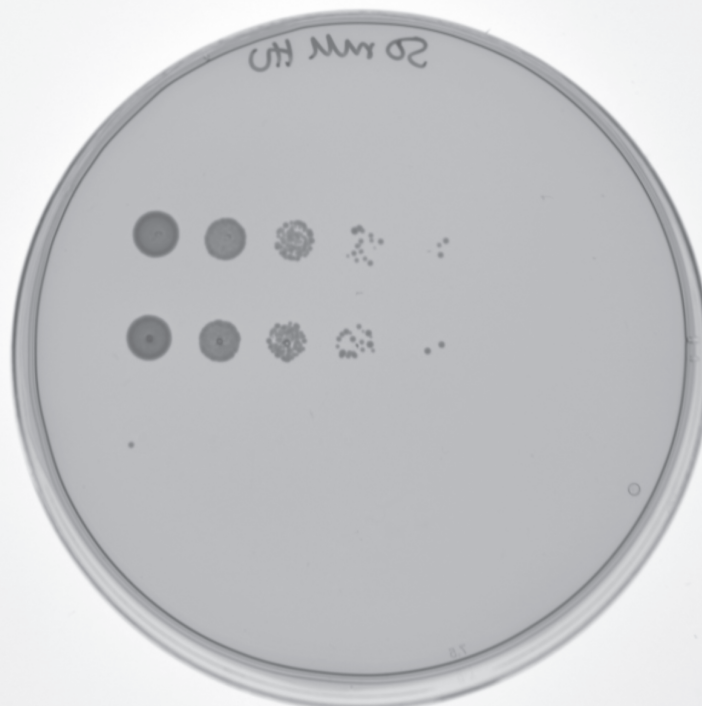

cropped area for Figure 5 -  
figure supplement 1C  
(YPD + 50 mM HU)



---

Figure 5 - figure supplement 1 - source data 4.pdf  
2048 x 2816

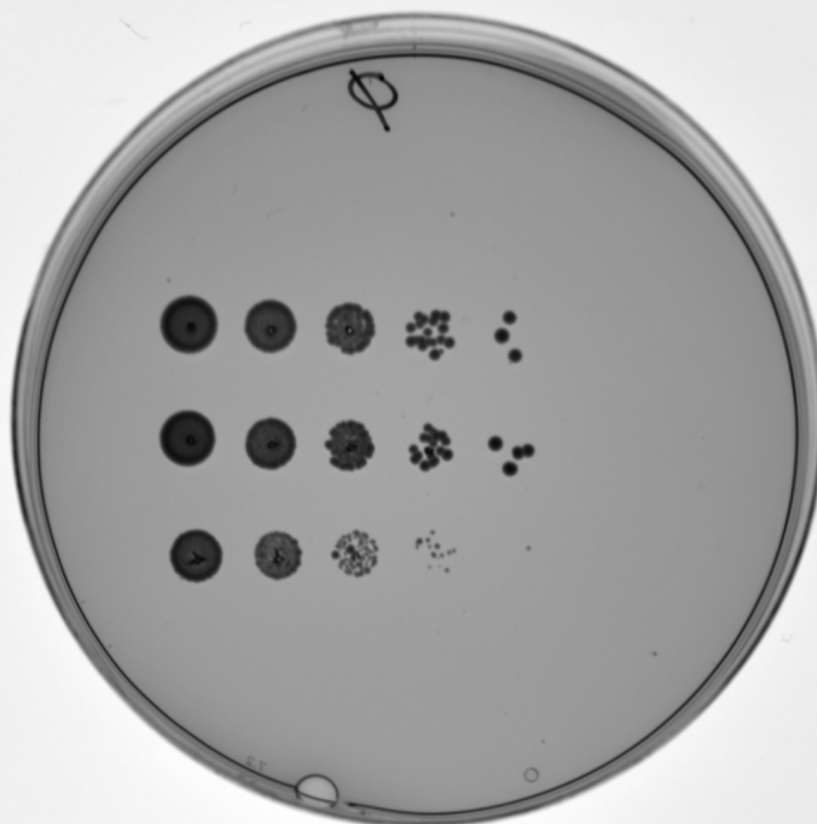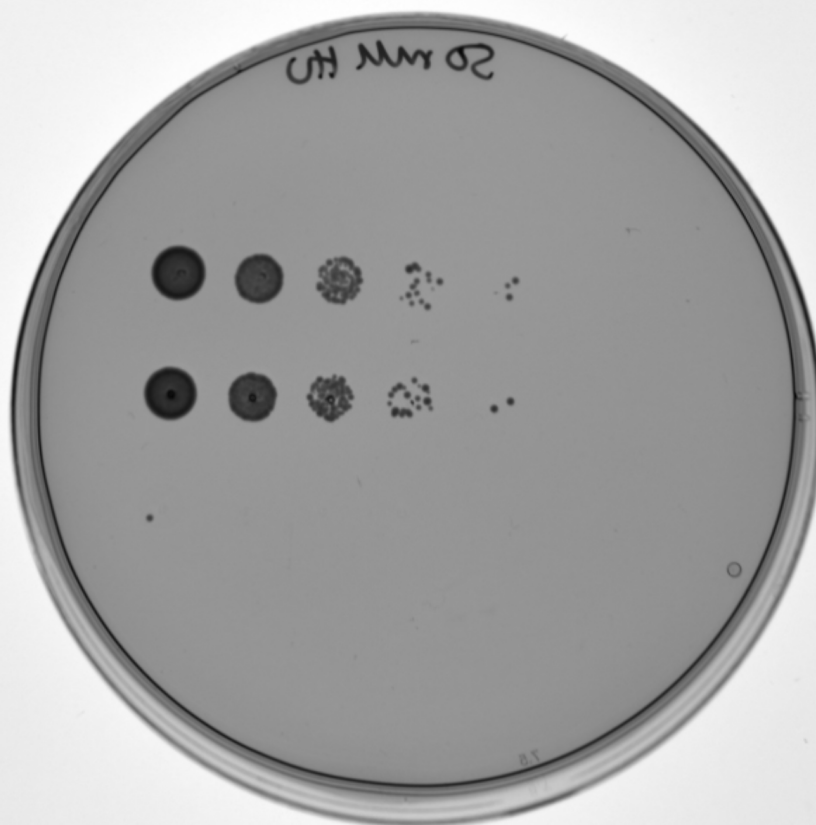

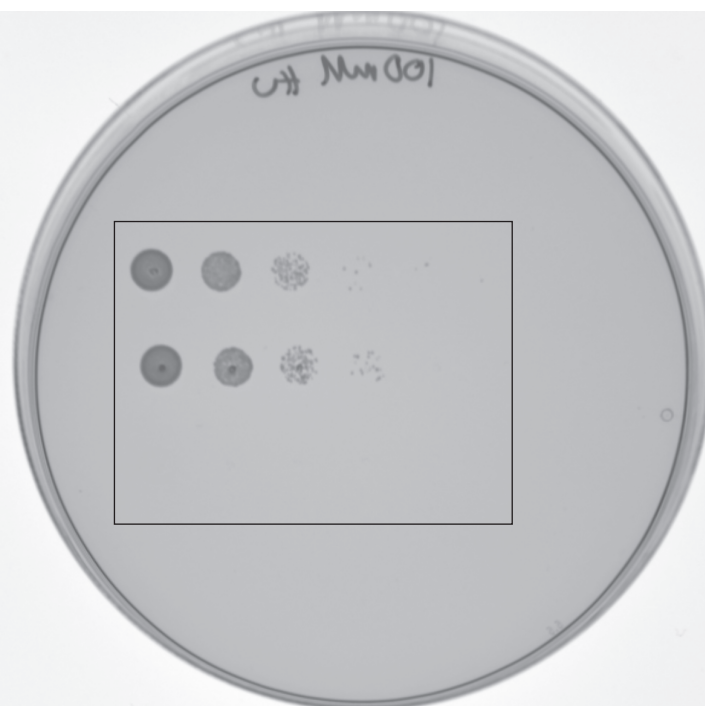

cropped area for Figure 5 -  
figure supplement 1C  
(YPD + 100 mM HU)

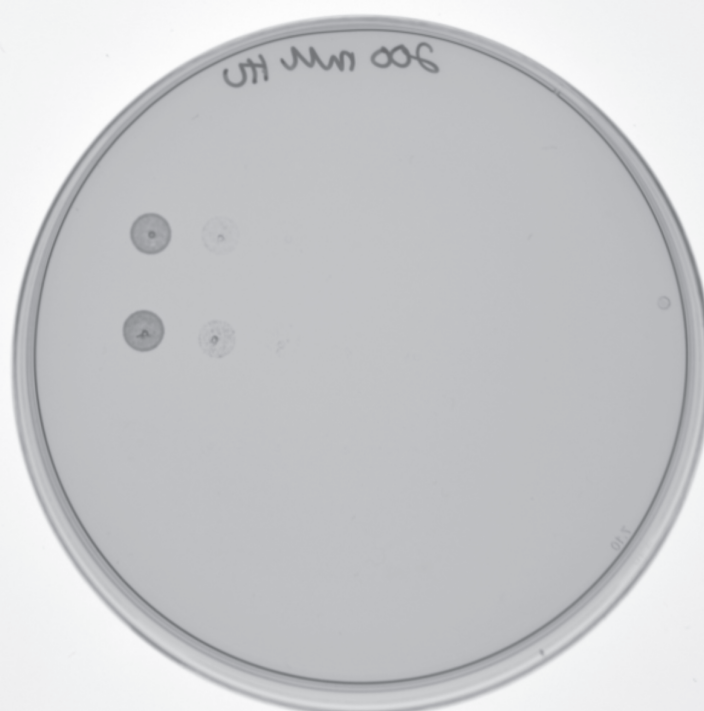

---

Figure 5 - figure supplement 1 - source data 5.pdf  
2048 x 2816

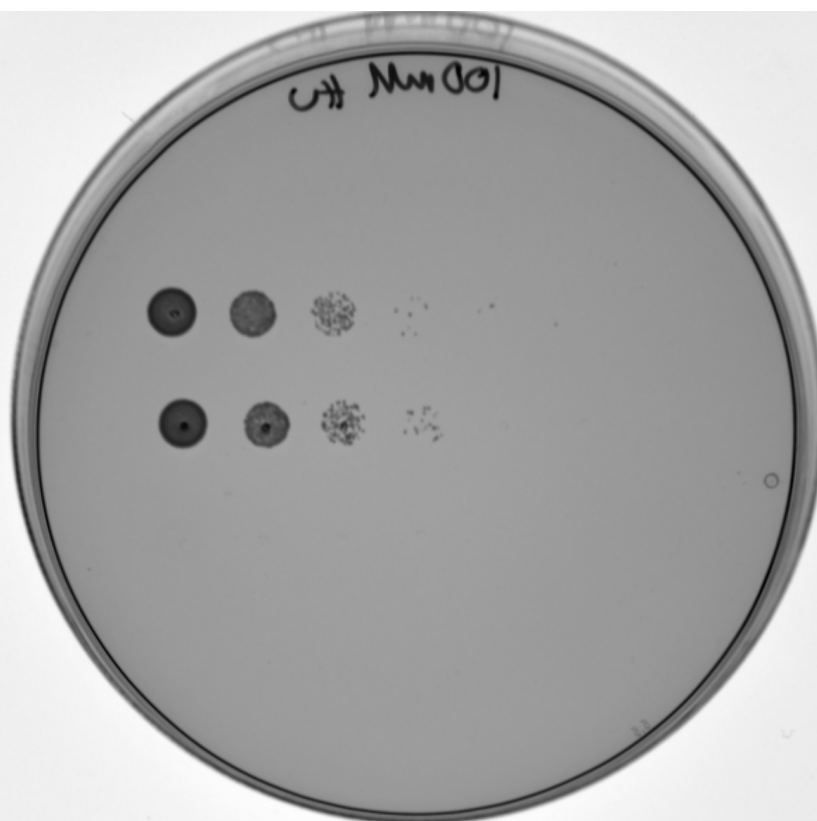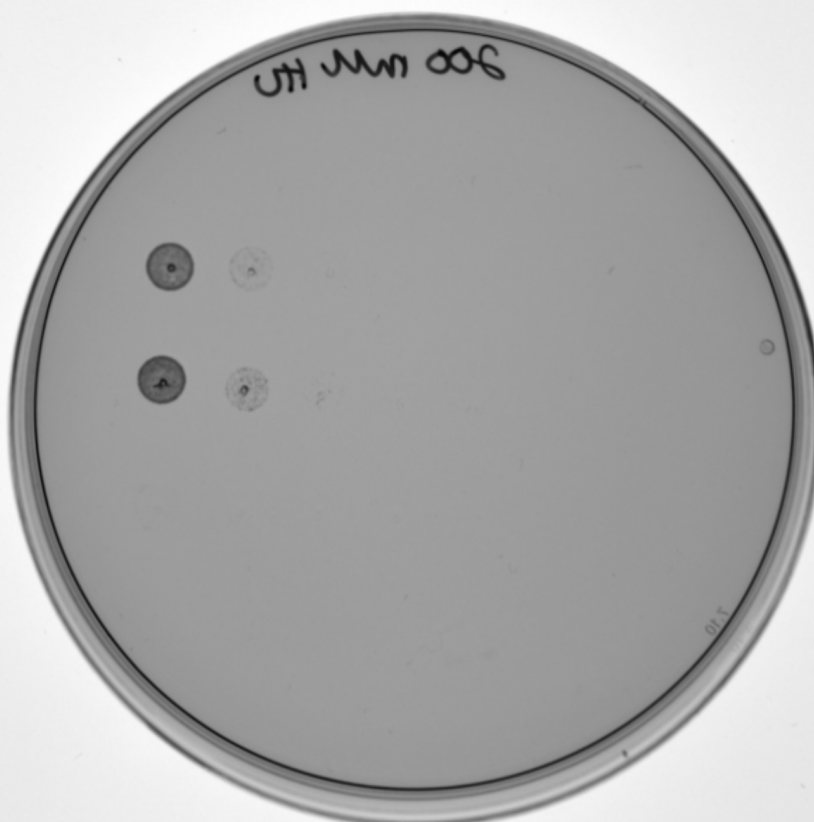



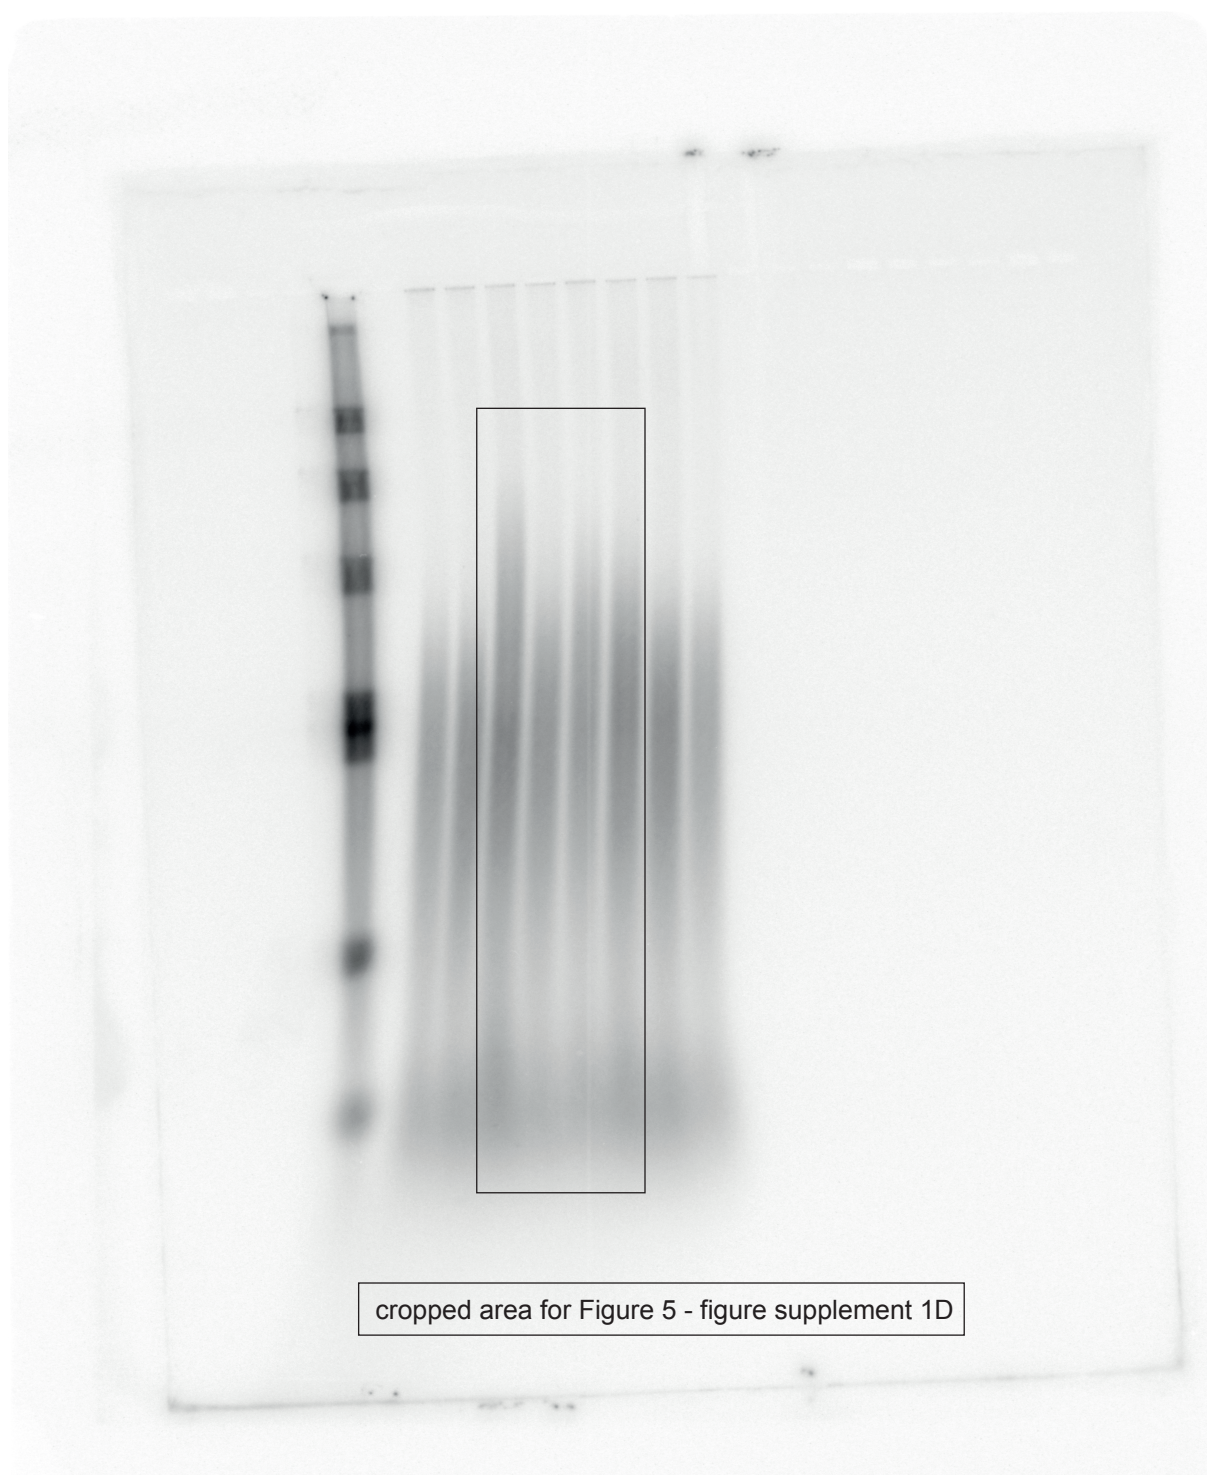

---

Figure 5 - figure supplement 1 - source data 6.pdf  
5000 x 4000

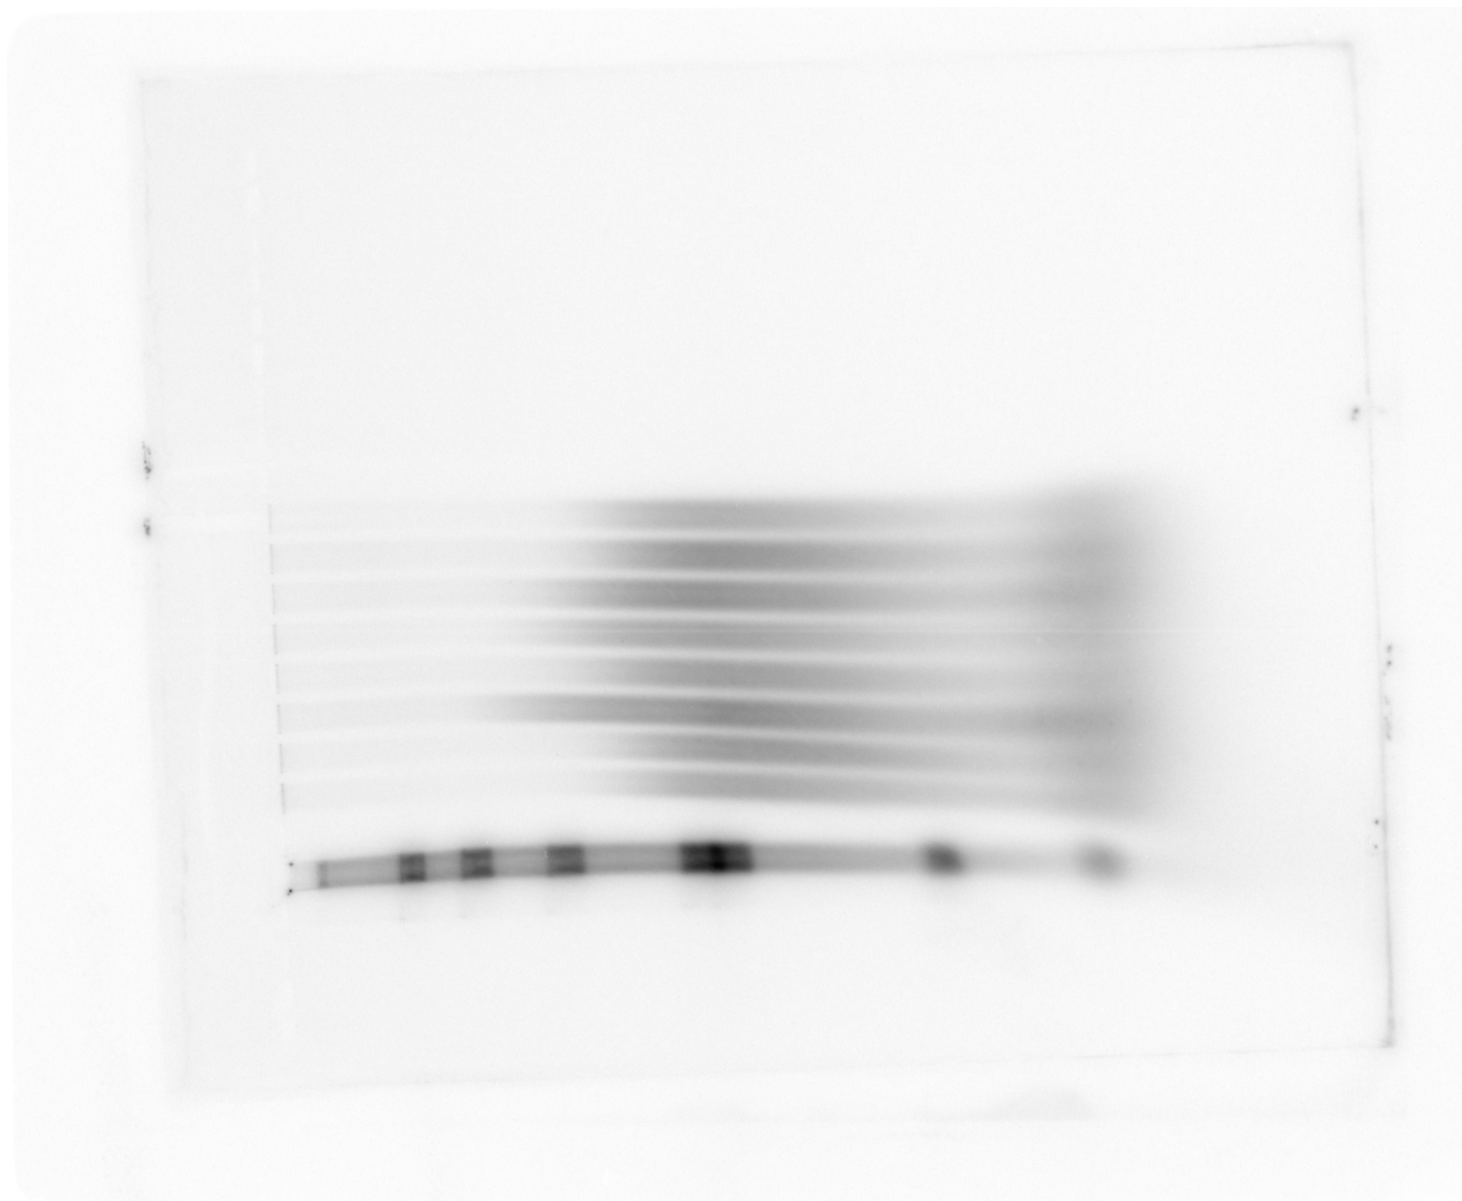

Supplement: fig5-figsupp1-data1 [file elife-69726-fig5-figsupp1-data1-v2.pdf]
