# Supplementary material for: Rad53 checkpoint kinase regulation of DNA replication fork rate via Mrc1 phosphorylation
Source: eLife. 2021 Aug 13;10:e69726. doi: 10.7554/eLife.69726 (PMC8387023; doi:10.7554/eLife.69726)
Supplement: Figure 4—source data 3. [file elife-69726-fig4-data3.xlsx]

## Sheet: Sheet1
raw data (triplicates)					transformed data (averaged triplicates and transformed to ssDNA)
qPCR site	sample	time (min)	Ct		qPCR site	sample	time (min)	average Ct	ssDNA (fmol)	% control
control	noM1 (Fig 4E)	2.5	9.601		control	noM1 (Fig 4E)	2.5	9.56867	0.0393795	NA
control	noM1 (Fig 4E)	2.5	9.766		control	noM1 (Fig 4E)	5	9.60967	0.0384132	NA
control	noM1 (Fig 4E)	2.5	9.339		control	noM1 (Fig 4E)	7.5	9.67267	0.0369743	NA
control	noM1 (Fig 4E)	5	9.477		control	noM1 (Fig 4E)	10	9.42267	0.0430222	NA
control	noM1 (Fig 4E)	5	9.68		control	noM1 (Fig 4E)	12.5	9.40467	0.0434941	NA
control	noM1 (Fig 4E)	5	9.672		control	noM1 (Fig 4E)	15	9.41867	0.0431266	NA
control	noM1 (Fig 4E)	7.5	9.578		control	noM1 (Fig 4E)	17.5	9.31433	0.0459413	NA
control	noM1 (Fig 4E)	7.5	9.7		control	noM1 (Fig 4E)	20	9.49233	0.0412438	NA
control	noM1 (Fig 4E)	7.5	9.74		control	noM1 (Fig 4E)	25	9.299	0.0463701	NA
control	noM1 (Fig 4E)	10	9.291		control	noM1 (Fig 4E)	30	9.30067	0.0463233	NA
control	noM1 (Fig 4E)	10	9.387		control	noM1 (Fig 4E)	40	9.30633	0.0461645	NA
control	noM1 (Fig 4E)	10	9.59		control	noM1 (Fig 4E)	50	9.22367	0.048536	NA
control	noM1 (Fig 4E)	12.5	9.371		200bp	noM1 (Fig 4E)	2.5	15.8187	0.00116488	2.95809
control	noM1 (Fig 4E)	12.5	9.337		200bp	noM1 (Fig 4E)	5	15.3233	0.00161126	4.19456
control	noM1 (Fig 4E)	12.5	9.506		200bp	noM1 (Fig 4E)	7.5	14.8867	0.00214469	5.80049
control	noM1 (Fig 4E)	15	9.352		200bp	noM1 (Fig 4E)	10	14.4283	0.00289552	6.73029
control	noM1 (Fig 4E)	15	9.44		200bp	noM1 (Fig 4E)	12.5	14.257	0.00323935	7.4478
control	noM1 (Fig 4E)	15	9.464		200bp	noM1 (Fig 4E)	15	13.9293	0.00401471	9.30912
control	noM1 (Fig 4E)	17.5	9.235		200bp	noM1 (Fig 4E)	17.5	13.7207	0.00460261	10.0185
control	noM1 (Fig 4E)	17.5	9.413		200bp	noM1 (Fig 4E)	20	13.624	0.00490341	11.8888
control	noM1 (Fig 4E)	17.5	9.295		200bp	noM1 (Fig 4E)	25	13.3393	0.00590833	12.7417
control	noM1 (Fig 4E)	20	9.487		200bp	noM1 (Fig 4E)	30	13.129	0.00678092	14.6382
control	noM1 (Fig 4E)	20	9.464		200bp	noM1 (Fig 4E)	40	13.048	0.00715034	15.4888
control	noM1 (Fig 4E)	20	9.526		200bp	noM1 (Fig 4E)	50	12.9447	0.00765098	15.7635
control	noM1 (Fig 4E)	25	9.194		500bp	noM1 (Fig 4E)	2.5	15.035	0.000832583	2.11426
control	noM1 (Fig 4E)	25	9.266		500bp	noM1 (Fig 4E)	5	15.0623	0.000818309	2.13028
control	noM1 (Fig 4E)	25	9.437		500bp	noM1 (Fig 4E)	7.5	14.124	0.00148164	4.00721
control	noM1 (Fig 4E)	30	9.296		500bp	noM1 (Fig 4E)	10	13.3837	0.00236681	5.50136
control	noM1 (Fig 4E)	30	9.226		500bp	noM1 (Fig 4E)	12.5	13.001	0.00301514	6.93231
control	noM1 (Fig 4E)	30	9.38		500bp	noM1 (Fig 4E)	15	12.5937	0.00390149	9.04659
control	noM1 (Fig 4E)	40	9.262		500bp	noM1 (Fig 4E)	17.5	12.164	0.00512023	11.1452
control	noM1 (Fig 4E)	40	9.286		500bp	noM1 (Fig 4E)	20	12.4333	0.00431803	10.4695
control	noM1 (Fig 4E)	40	9.371		500bp	noM1 (Fig 4E)	25	11.938	0.00590728	12.7394
control	noM1 (Fig 4E)	50	9.258		500bp	noM1 (Fig 4E)	30	11.8363	0.00629974	13.5995
control	noM1 (Fig 4E)	50	9.078		500bp	noM1 (Fig 4E)	40	11.6823	0.00694444	15.0428
control	noM1 (Fig 4E)	50	9.335		500bp	noM1 (Fig 4E)	50	11.7723	0.00656006	13.5159
200bp	noM1 (Fig 4E)	2.5	15.683		1000bp	noM1 (Fig 4E)	2.5	17.9063	0.000586524	1.48941
200bp	noM1 (Fig 4E)	2.5	15.914		1000bp	noM1 (Fig 4E)	5	18.4327	0.000428629	1.11584
200bp	noM1 (Fig 4E)	2.5	15.859		1000bp	noM1 (Fig 4E)	7.5	17.483	0.000754806	2.04143
200bp	noM1 (Fig 4E)	5	15.144		1000bp	noM1 (Fig 4E)	10	16.5657	0.00130383	3.03061
200bp	noM1 (Fig 4E)	5	15.419		1000bp	noM1 (Fig 4E)	12.5	16.0857	0.00173555	3.99031
200bp	noM1 (Fig 4E)	5	15.407		1000bp	noM1 (Fig 4E)	15	15.9537	0.00187757	4.35361
200bp	noM1 (Fig 4E)	7.5	14.867		1000bp	noM1 (Fig 4E)	17.5	15.4387	0.00255192	5.55474
200bp	noM1 (Fig 4E)	7.5	14.85		1000bp	noM1 (Fig 4E)	20	15.3737	0.0026527	6.43174
200bp	noM1 (Fig 4E)	7.5	14.943		1000bp	noM1 (Fig 4E)	25	14.5827	0.00424993	9.16523
200bp	noM1 (Fig 4E)	10	14.348		1000bp	noM1 (Fig 4E)	30	14.5013	0.00446097	9.63007
200bp	noM1 (Fig 4E)	10	14.336		1000bp	noM1 (Fig 4E)	40	14.0987	0.00567062	12.2835
200bp	noM1 (Fig 4E)	10	14.601		1000bp	noM1 (Fig 4E)	50	13.9027	0.00637311	13.1307
200bp	noM1 (Fig 4E)	12.5	14.222		1500bp	noM1 (Fig 4E)	2.5	15.801	0.000658219	1.67148
200bp	noM1 (Fig 4E)	12.5	14.207		1500bp	noM1 (Fig 4E)	5	16.9763	0.000300353	0.7819
200bp	noM1 (Fig 4E)	12.5	14.342		1500bp	noM1 (Fig 4E)	7.5	16.4533	0.000425847	1.15174
200bp	noM1 (Fig 4E)	15	13.783		1500bp	noM1 (Fig 4E)	10	15.8513	0.00063647	1.4794
200bp	noM1 (Fig 4E)	15	13.879		1500bp	noM1 (Fig 4E)	12.5	15.3777	0.000873169	2.00756
200bp	noM1 (Fig 4E)	15	14.126		1500bp	noM1 (Fig 4E)	15	14.942	0.00116789	2.70804
200bp	noM1 (Fig 4E)	17.5	13.615		1500bp	noM1 (Fig 4E)	17.5	14.5117	0.00155653	3.3881
200bp	noM1 (Fig 4E)	17.5	13.696		1500bp	noM1 (Fig 4E)	20	14.1627	0.00196488	4.76407
200bp	noM1 (Fig 4E)	17.5	13.851		1500bp	noM1 (Fig 4E)	25	13.5937	0.00287273	6.19521
200bp	noM1 (Fig 4E)	20	13.579		1500bp	noM1 (Fig 4E)	30	13.2593	0.00359104	7.75213
200bp	noM1 (Fig 4E)	20	13.651		1500bp	noM1 (Fig 4E)	40	12.7923	0.00490465	10.6243
200bp	noM1 (Fig 4E)	20	13.642		1500bp	noM1 (Fig 4E)	50	12.558	0.00573512	11.8162
200bp	noM1 (Fig 4E)	25	13.145		2000bp	noM1 (Fig 4E)	2.5	16.5607	0.000452381	1.14877
200bp	noM1 (Fig 4E)	25	13.332		2000bp	noM1 (Fig 4E)	5	18.3247	0.000142374	0.370638
200bp	noM1 (Fig 4E)	25	13.541		2000bp	noM1 (Fig 4E)	7.5	17.9147	0.000186262	0.503761
200bp	noM1 (Fig 4E)	30	13.011		2000bp	noM1 (Fig 4E)	10	17.3283	0.000273533	0.635794
200bp	noM1 (Fig 4E)	30	13.195		2000bp	noM1 (Fig 4E)	12.5	16.971	0.000345712	0.794849
200bp	noM1 (Fig 4E)	30	13.181		2000bp	noM1 (Fig 4E)	15	16.3977	0.000503383	1.16722
200bp	noM1 (Fig 4E)	40	13.106		2000bp	noM1 (Fig 4E)	17.5	15.638	0.000828165	1.80266
200bp	noM1 (Fig 4E)	40	12.991		2000bp	noM1 (Fig 4E)	20	15.4807	0.000918116	2.22607
200bp	noM1 (Fig 4E)	40	13.047		2000bp	noM1 (Fig 4E)	25	14.603	0.00163193	3.51936
200bp	noM1 (Fig 4E)	50	12.887		2000bp	noM1 (Fig 4E)	30	14.094	0.00227811	4.91785
200bp	noM1 (Fig 4E)	50	12.951		2000bp	noM1 (Fig 4E)	40	13.3167	0.00379159	8.21322
200bp	noM1 (Fig 4E)	50	12.996		2000bp	noM1 (Fig 4E)	50	12.9277	0.00489261	10.0804
500bp	noM1 (Fig 4E)	2.5	15.051		control	M1 (Fig 4F)	2.5	9.78333	0.0345761	NA
500bp	noM1 (Fig 4E)	2.5	14.956		control	M1 (Fig 4F)	5	9.426	0.0429354	NA
500bp	noM1 (Fig 4E)	2.5	15.098		control	M1 (Fig 4F)	7.5	9.714	0.0360598	NA
500bp	noM1 (Fig 4E)	5	15.184		control	M1 (Fig 4F)	10	9.27433	0.0470684	NA
500bp	noM1 (Fig 4E)	5	15.028		control	M1 (Fig 4F)	12.5	9.36933	0.0444354	NA
500bp	noM1 (Fig 4E)	5	14.975		control	M1 (Fig 4F)	15	9.27933	0.046926	NA
500bp	noM1 (Fig 4E)	7.5	14.379		control	M1 (Fig 4F)	17.5	9.274	0.0470779	NA
500bp	noM1 (Fig 4E)	7.5	13.899		control	M1 (Fig 4F)	20	9.30733	0.0461366	NA
500bp	noM1 (Fig 4E)	7.5	14.094		control	M1 (Fig 4F)	25	9.24867	0.0478062	NA
500bp	noM1 (Fig 4E)	10	13.531		control	M1 (Fig 4F)	30	9.27067	0.0471731	NA
500bp	noM1 (Fig 4E)	10	13.308		control	M1 (Fig 4F)	40	9.32667	0.0455992	NA
500bp	noM1 (Fig 4E)	10	13.312		control	M1 (Fig 4F)	50	9.24467	0.0479223	NA
500bp	noM1 (Fig 4E)	12.5	13.165		200bp	M1 (Fig 4F)	2.5	16.68	0.00066267	1.91656
500bp	noM1 (Fig 4E)	12.5	12.92		200bp	M1 (Fig 4F)	5	15.348	0.00158544	3.69262
500bp	noM1 (Fig 4E)	12.5	12.918		200bp	M1 (Fig 4F)	7.5	14.5223	0.00272264	7.55036
500bp	noM1 (Fig 4E)	15	12.806		200bp	M1 (Fig 4F)	10	14.1183	0.0035473	7.53647
500bp	noM1 (Fig 4E)	15	12.331		200bp	M1 (Fig 4F)	12.5	13.8737	0.00416377	9.37041
500bp	noM1 (Fig 4E)	15	12.644		200bp	M1 (Fig 4F)	15	13.5773	0.00505559	10.7735
500bp	noM1 (Fig 4E)	17.5	12.662		200bp	M1 (Fig 4F)	17.5	13.5007	0.00531591	11.2917
500bp	noM1 (Fig 4E)	17.5	11.941		200bp	M1 (Fig 4F)	20	13.5457	0.00516153	11.1875
500bp	noM1 (Fig 4E)	17.5	11.889		200bp	M1 (Fig 4F)	25	13.3523	0.00585824	12.2541
500bp	noM1 (Fig 4E)	20	12.615		200bp	M1 (Fig 4F)	30	13.426	0.00558232	11.8337
500bp	noM1 (Fig 4E)	20	12.361		200bp	M1 (Fig 4F)	40	13.2257	0.00636494	13.9584
500bp	noM1 (Fig 4E)	20	12.324		200bp	M1 (Fig 4F)	50	13.2227	0.00637745	13.3079
500bp	noM1 (Fig 4E)	25	12.034		500bp	M1 (Fig 4F)	2.5	16.3053	0.000372717	1.07796
500bp	noM1 (Fig 4E)	25	11.869		500bp	M1 (Fig 4F)	5	14.592	0.00110192	2.56646
500bp	noM1 (Fig 4E)	25	11.911		500bp	M1 (Fig 4F)	7.5	13.401	0.00234099	6.49199
500bp	noM1 (Fig 4E)	30	11.881		500bp	M1 (Fig 4F)	10	12.859	0.00329857	7.00802
500bp	noM1 (Fig 4E)	30	11.862		500bp	M1 (Fig 4F)	12.5	12.747	0.00354078	7.96839
500bp	noM1 (Fig 4E)	30	11.766		500bp	M1 (Fig 4F)	15	12.334	0.00459811	9.79862
500bp	noM1 (Fig 4E)	40	11.735		500bp	M1 (Fig 4F)	17.5	12.0377	0.00554629	11.7811
500bp	noM1 (Fig 4E)	40	11.641		500bp	M1 (Fig 4F)	20	12.0497	0.00550434	11.9305
500bp	noM1 (Fig 4E)	40	11.671		500bp	M1 (Fig 4F)	25	11.9723	0.00578035	12.0912
500bp	noM1 (Fig 4E)	50	11.638		500bp	M1 (Fig 4F)	30	11.9067	0.00602555	12.7733
500bp	noM1 (Fig 4E)	50	11.635		500bp	M1 (Fig 4F)	40	11.988	0.00572333	12.5514
500bp	noM1 (Fig 4E)	50	12.044		500bp	M1 (Fig 4F)	50	11.8327	0.00631437	13.1763
1000bp	noM1 (Fig 4E)	2.5	18.066		1000bp	M1 (Fig 4F)	2.5	19.316	0.000253217	0.732347
1000bp	noM1 (Fig 4E)	2.5	17.811		1000bp	M1 (Fig 4F)	5	17.497	0.000748536	1.7434
1000bp	noM1 (Fig 4E)	2.5	17.842		1000bp	M1 (Fig 4F)	7.5	15.7973	0.00206087	5.71516
1000bp	noM1 (Fig 4E)	5	18.597		1000bp	M1 (Fig 4F)	10	15.3973	0.00261555	5.5569
1000bp	noM1 (Fig 4E)	5	18.398		1000bp	M1 (Fig 4F)	12.5	15.02	0.00327498	7.37022
1000bp	noM1 (Fig 4E)	5	18.303		1000bp	M1 (Fig 4F)	15	14.6863	0.00399535	8.51414
1000bp	noM1 (Fig 4E)	7.5	17.581		1000bp	M1 (Fig 4F)	17.5	14.3603	0.00485196	10.3062
1000bp	noM1 (Fig 4E)	7.5	17.431		1000bp	M1 (Fig 4F)	20	14.4493	0.00460135	9.97333
1000bp	noM1 (Fig 4E)	7.5	17.437		1000bp	M1 (Fig 4F)	25	13.9647	0.00614197	12.8476
1000bp	noM1 (Fig 4E)	10	16.675		1000bp	M1 (Fig 4F)	30	14.1447	0.00551731	11.6959
1000bp	noM1 (Fig 4E)	10	16.47		1000bp	M1 (Fig 4F)	40	14.1583	0.00547256	12.0014
1000bp	noM1 (Fig 4E)	10	16.552		1000bp	M1 (Fig 4F)	50	14.0883	0.00570565	11.9061
1000bp	noM1 (Fig 4E)	12.5	16.231		1500bp	M1 (Fig 4F)	2.5	17.539	0.000206305	0.596669
1000bp	noM1 (Fig 4E)	12.5	15.984		1500bp	M1 (Fig 4F)	5	16.19	0.000507687	1.18244
1000bp	noM1 (Fig 4E)	12.5	16.042		1500bp	M1 (Fig 4F)	7.5	14.9313	0.00117623	3.2619
1000bp	noM1 (Fig 4E)	15	15.802		1500bp	M1 (Fig 4F)	10	14.1673	0.00195877	4.16154
1000bp	noM1 (Fig 4E)	15	15.843		1500bp	M1 (Fig 4F)	12.5	13.6743	0.00272213	6.12604
1000bp	noM1 (Fig 4E)	15	16.216		1500bp	M1 (Fig 4F)	15	13.3177	0.0034539	7.3603
1000bp	noM1 (Fig 4E)	17.5	15.337		1500bp	M1 (Fig 4F)	17.5	13.1263	0.00392445	8.33606
1000bp	noM1 (Fig 4E)	17.5	15.28		1500bp	M1 (Fig 4F)	20	12.9957	0.00428213	9.28142
1000bp	noM1 (Fig 4E)	17.5	15.699		1500bp	M1 (Fig 4F)	25	12.8357	0.0047648	9.96691
1000bp	noM1 (Fig 4E)	20	15.247		1500bp	M1 (Fig 4F)	30	12.6747	0.00530543	11.2467
1000bp	noM1 (Fig 4E)	20	15.171		1500bp	M1 (Fig 4F)	40	12.547	0.00577739	12.6699
1000bp	noM1 (Fig 4E)	20	15.703		1500bp	M1 (Fig 4F)	50	12.494	0.00598545	12.4899
1000bp	noM1 (Fig 4E)	25	14.222		2000bp	M1 (Fig 4F)	2.5	18.3597	0.000139145	0.402431
1000bp	noM1 (Fig 4E)	25	14.457		2000bp	M1 (Fig 4F)	5	17.666	0.000219231	0.510606
1000bp	noM1 (Fig 4E)	25	15.069		2000bp	M1 (Fig 4F)	7.5	15.6737	0.000809032	2.24359
1000bp	noM1 (Fig 4E)	30	14.509		2000bp	M1 (Fig 4F)	10	15.3903	0.000974111	2.06956
1000bp	noM1 (Fig 4E)	30	14.313		2000bp	M1 (Fig 4F)	12.5	14.744	0.00148789	3.34843
1000bp	noM1 (Fig 4E)	30	14.682		2000bp	M1 (Fig 4F)	15	14.154	0.00219027	4.66749
1000bp	noM1 (Fig 4E)	40	13.949		2000bp	M1 (Fig 4F)	17.5	13.692	0.00296479	6.29761
1000bp	noM1 (Fig 4E)	40	13.903		2000bp	M1 (Fig 4F)	20	13.5213	0.00331565	7.18661
1000bp	noM1 (Fig 4E)	40	14.444		2000bp	M1 (Fig 4F)	25	13.0493	0.00451763	9.44989
1000bp	noM1 (Fig 4E)	50	13.689		2000bp	M1 (Fig 4F)	30	12.7713	0.00542046	11.4906
1000bp	noM1 (Fig 4E)	50	13.754		2000bp	M1 (Fig 4F)	40	12.6603	0.00582948	12.7842
1000bp	noM1 (Fig 4E)	50	14.265		2000bp	M1 (Fig 4F)	50	12.5667	0.00619853	12.9346
1500bp	noM1 (Fig 4E)	2.5	15.685		control	PM1 (Fig 4G)	2.5	9.757	0.0351323	NA
1500bp	noM1 (Fig 4E)	2.5	15.964		control	PM1 (Fig 4G)	5	9.26967	0.0472017	NA
1500bp	noM1 (Fig 4E)	2.5	15.754		control	PM1 (Fig 4G)	7.5	9.209	0.0489693	NA
1500bp	noM1 (Fig 4E)	5	16.76		control	PM1 (Fig 4G)	10	9.11	0.0519969	NA
1500bp	noM1 (Fig 4E)	5	17.176		control	PM1 (Fig 4G)	12.5	9.26	0.047479	NA
1500bp	noM1 (Fig 4E)	5	16.993		control	PM1 (Fig 4G)	15	9.17833	0.0498878	NA
1500bp	noM1 (Fig 4E)	7.5	16.269		control	PM1 (Fig 4G)	17.5	9.178	0.0498979	NA
1500bp	noM1 (Fig 4E)	7.5	16.593		control	PM1 (Fig 4G)	20	9.26967	0.0472017	NA
1500bp	noM1 (Fig 4E)	7.5	16.498		control	PM1 (Fig 4G)	25	8.92467	0.058177	NA
1500bp	noM1 (Fig 4E)	10	15.84		control	PM1 (Fig 4G)	30	9.01167	0.0551894	NA
1500bp	noM1 (Fig 4E)	10	15.947		control	PM1 (Fig 4G)	40	9.05467	0.0537699	NA
1500bp	noM1 (Fig 4E)	10	15.767		control	PM1 (Fig 4G)	50	9.022	0.0548449	NA
1500bp	noM1 (Fig 4E)	12.5	15.279		200bp	PM1 (Fig 4G)	2.5	16.5863	0.000704594	2.00554
1500bp	noM1 (Fig 4E)	12.5	15.562		200bp	PM1 (Fig 4G)	5	15.2767	0.00166127	3.51951
1500bp	noM1 (Fig 4E)	12.5	15.292		200bp	PM1 (Fig 4G)	7.5	14.7467	0.00235063	4.80022
1500bp	noM1 (Fig 4E)	15	14.832		200bp	PM1 (Fig 4G)	10	14.6443	0.00251357	4.83407
1500bp	noM1 (Fig 4E)	15	15.059		200bp	PM1 (Fig 4G)	12.5	14.1643	0.00344203	7.24957
1500bp	noM1 (Fig 4E)	15	14.935		200bp	PM1 (Fig 4G)	15	14.092	0.00360901	7.23425
1500bp	noM1 (Fig 4E)	17.5	14.533		200bp	PM1 (Fig 4G)	17.5	13.9853	0.00387014	7.75612
1500bp	noM1 (Fig 4E)	17.5	14.561		200bp	PM1 (Fig 4G)	20	13.7127	0.00462679	9.80215
1500bp	noM1 (Fig 4E)	17.5	14.441		200bp	PM1 (Fig 4G)	25	13.5853	0.00502917	8.64459
1500bp	noM1 (Fig 4E)	20	14.051		200bp	PM1 (Fig 4G)	30	13.4107	0.00563866	10.2169
1500bp	noM1 (Fig 4E)	20	14.326		200bp	PM1 (Fig 4G)	40	13.3537	0.00585312	10.8855
1500bp	noM1 (Fig 4E)	20	14.111		200bp	PM1 (Fig 4G)	50	13.1673	0.0066128	12.0573
1500bp	noM1 (Fig 4E)	25	13.428		500bp	PM1 (Fig 4G)	2.5	16.617	0.000306015	0.871037
1500bp	noM1 (Fig 4E)	25	13.721		500bp	PM1 (Fig 4G)	5	15.464	0.000634676	1.3446
1500bp	noM1 (Fig 4E)	25	13.632		500bp	PM1 (Fig 4G)	7.5	14.3823	0.00125823	2.56943
1500bp	noM1 (Fig 4E)	30	13.098		500bp	PM1 (Fig 4G)	10	13.9143	0.00169181	3.25368
1500bp	noM1 (Fig 4E)	30	13.432		500bp	PM1 (Fig 4G)	12.5	13.071	0.00288452	6.07536
1500bp	noM1 (Fig 4E)	30	13.248		500bp	PM1 (Fig 4G)	15	12.8547	0.00330762	6.63012
1500bp	noM1 (Fig 4E)	40	12.671		500bp	PM1 (Fig 4G)	17.5	11.9927	0.00570646	11.4363
1500bp	noM1 (Fig 4E)	40	12.888		500bp	PM1 (Fig 4G)	20	12.315	0.00465371	9.8592
1500bp	noM1 (Fig 4E)	40	12.818		500bp	PM1 (Fig 4G)	25	12.115	0.00528145	9.07824
1500bp	noM1 (Fig 4E)	50	12.454		500bp	PM1 (Fig 4G)	30	11.924	0.00595984	10.7989
1500bp	noM1 (Fig 4E)	50	12.611		500bp	PM1 (Fig 4G)	40	11.9093	0.0060154	11.1873
1500bp	noM1 (Fig 4E)	50	12.609		500bp	PM1 (Fig 4G)	50	11.5843	0.00738864	13.4719
2000bp	noM1 (Fig 4E)	2.5	16.454		1000bp	PM1 (Fig 4G)	2.5	19.312	0.000253821	0.722473
2000bp	noM1 (Fig 4E)	2.5	16.811		1000bp	PM1 (Fig 4G)	5	18.3037	0.000462875	0.980631
2000bp	noM1 (Fig 4E)	2.5	16.417		1000bp	PM1 (Fig 4G)	7.5	17.279	0.000852367	1.74062
2000bp	noM1 (Fig 4E)	5	18.382		1000bp	PM1 (Fig 4G)	10	16.6233	0.00125979	2.42282
2000bp	noM1 (Fig 4E)	5	18.32		1000bp	PM1 (Fig 4G)	12.5	15.9847	0.0018432	3.88214
2000bp	noM1 (Fig 4E)	5	18.272		1000bp	PM1 (Fig 4G)	15	15.9643	0.00186567	3.73974
2000bp	noM1 (Fig 4E)	7.5	17.639		1000bp	PM1 (Fig 4G)	17.5	15.657	0.00224061	4.4904
2000bp	noM1 (Fig 4E)	7.5	18.026		1000bp	PM1 (Fig 4G)	20	15.2137	0.00291805	6.18207
2000bp	noM1 (Fig 4E)	7.5	18.079		1000bp	PM1 (Fig 4G)	25	14.6433	0.00409904	7.04581
2000bp	noM1 (Fig 4E)	10	17.004		1000bp	PM1 (Fig 4G)	30	14.6183	0.00416056	7.53869
2000bp	noM1 (Fig 4E)	10	17.525		1000bp	PM1 (Fig 4G)	40	14.3387	0.004915	9.1408
2000bp	noM1 (Fig 4E)	10	17.456		1000bp	PM1 (Fig 4G)	50	14.4763	0.00452792	8.25585
2000bp	noM1 (Fig 4E)	12.5	16.979		1500bp	PM1 (Fig 4G)	2.5	17.6013	0.000197897	0.56329
2000bp	noM1 (Fig 4E)	12.5	16.962		1500bp	PM1 (Fig 4G)	5	17.0957	0.000277355	0.587594
2000bp	noM1 (Fig 4E)	12.5	16.972		1500bp	PM1 (Fig 4G)	7.5	16.589	0.000388976	0.794326
2000bp	noM1 (Fig 4E)	15	16.158		1500bp	PM1 (Fig 4G)	10	16.1343	0.000526907	1.01334
2000bp	noM1 (Fig 4E)	15	16.573		1500bp	PM1 (Fig 4G)	12.5	15.595	0.000755251	1.5907
2000bp	noM1 (Fig 4E)	15	16.462		1500bp	PM1 (Fig 4G)	15	15.426	0.000845446	1.6947
2000bp	noM1 (Fig 4E)	17.5	15.454		1500bp	PM1 (Fig 4G)	17.5	15.1323	0.00102854	2.0613
2000bp	noM1 (Fig 4E)	17.5	15.896		1500bp	PM1 (Fig 4G)	20	14.8277	0.00126051	2.67048
2000bp	noM1 (Fig 4E)	17.5	15.564		1500bp	PM1 (Fig 4G)	25	14.327	0.00176074	3.02652
2000bp	noM1 (Fig 4E)	20	15.255		1500bp	PM1 (Fig 4G)	30	13.9273	0.00229912	4.16587
2000bp	noM1 (Fig 4E)	20	15.712		1500bp	PM1 (Fig 4G)	40	13.5087	0.00304044	5.65454
2000bp	noM1 (Fig 4E)	20	15.475		1500bp	PM1 (Fig 4G)	50	13.2173	0.00369315	6.7338
2000bp	noM1 (Fig 4E)	25	14.398		2000bp	PM1 (Fig 4G)	2.5	18.0473	0.000170752	0.486025
2000bp	noM1 (Fig 4E)	25	14.836		2000bp	PM1 (Fig 4G)	5	18.0473	0.000170752	0.361749
2000bp	noM1 (Fig 4E)	25	14.575		2000bp	PM1 (Fig 4G)	7.5	17.6193	0.000226039	0.461594
2000bp	noM1 (Fig 4E)	30	13.927		2000bp	PM1 (Fig 4G)	10	17.3753	0.000265236	0.510099
2000bp	noM1 (Fig 4E)	30	14.222		2000bp	PM1 (Fig 4G)	12.5	16.782	0.000391298	0.82415
2000bp	noM1 (Fig 4E)	30	14.133		2000bp	PM1 (Fig 4G)	15	16.7637	0.000396028	0.793838
2000bp	noM1 (Fig 4E)	40	13.19		2000bp	PM1 (Fig 4G)	17.5	16.4423	0.000488861	0.979723
2000bp	noM1 (Fig 4E)	40	13.386		2000bp	PM1 (Fig 4G)	20	15.718	0.000785863	1.6649
2000bp	noM1 (Fig 4E)	40	13.374		2000bp	PM1 (Fig 4G)	25	15.2	0.00110352	1.89684
2000bp	noM1 (Fig 4E)	50	12.761		2000bp	PM1 (Fig 4G)	30	14.735	0.00149669	2.71191
2000bp	noM1 (Fig 4E)	50	13.021		2000bp	PM1 (Fig 4G)	40	14.1663	0.00217264	4.04062
2000bp	noM1 (Fig 4E)	50	13.001		2000bp	PM1 (Fig 4G)	50	13.743	0.00286733	5.22807
control	M1 (Fig 4F)	2.5	10.169
control	M1 (Fig 4F)	2.5	9.742
control	M1 (Fig 4F)	2.5	9.439
control	M1 (Fig 4F)	5	9.421
control	M1 (Fig 4F)	5	9.498
control	M1 (Fig 4F)	5	9.359
control	M1 (Fig 4F)	7.5	9.275
control	M1 (Fig 4F)	7.5	9.342
control	M1 (Fig 4F)	7.5	10.525
control	M1 (Fig 4F)	10	9.219
control	M1 (Fig 4F)	10	9.233
control	M1 (Fig 4F)	10	9.371
control	M1 (Fig 4F)	12.5	9.286
control	M1 (Fig 4F)	12.5	9.324
control	M1 (Fig 4F)	12.5	9.498
control	M1 (Fig 4F)	15	9.2
control	M1 (Fig 4F)	15	9.331
control	M1 (Fig 4F)	15	9.307
control	M1 (Fig 4F)	17.5	9.14
control	M1 (Fig 4F)	17.5	9.325
control	M1 (Fig 4F)	17.5	9.357
control	M1 (Fig 4F)	20	9.18
control	M1 (Fig 4F)	20	9.339
control	M1 (Fig 4F)	20	9.403
control	M1 (Fig 4F)	25	9.147
control	M1 (Fig 4F)	25	9.304
control	M1 (Fig 4F)	25	9.295
control	M1 (Fig 4F)	30	9.197
control	M1 (Fig 4F)	30	9.314
control	M1 (Fig 4F)	30	9.301
control	M1 (Fig 4F)	40	9.179
control	M1 (Fig 4F)	40	9.4
control	M1 (Fig 4F)	40	9.401
control	M1 (Fig 4F)	50	9.119
control	M1 (Fig 4F)	50	9.304
control	M1 (Fig 4F)	50	9.311
200bp	M1 (Fig 4F)	2.5	16.592
200bp	M1 (Fig 4F)	2.5	16.747
200bp	M1 (Fig 4F)	2.5	16.701
200bp	M1 (Fig 4F)	5	15.292
200bp	M1 (Fig 4F)	5	15.386
200bp	M1 (Fig 4F)	5	15.366
200bp	M1 (Fig 4F)	7.5	14.433
200bp	M1 (Fig 4F)	7.5	14.56
200bp	M1 (Fig 4F)	7.5	14.574
200bp	M1 (Fig 4F)	10	13.953
200bp	M1 (Fig 4F)	10	14.134
200bp	M1 (Fig 4F)	10	14.268
200bp	M1 (Fig 4F)	12.5	13.755
200bp	M1 (Fig 4F)	12.5	13.975
200bp	M1 (Fig 4F)	12.5	13.891
200bp	M1 (Fig 4F)	15	13.295
200bp	M1 (Fig 4F)	15	13.722
200bp	M1 (Fig 4F)	15	13.715
200bp	M1 (Fig 4F)	17.5	13.398
200bp	M1 (Fig 4F)	17.5	13.516
200bp	M1 (Fig 4F)	17.5	13.588
200bp	M1 (Fig 4F)	20	13.419
200bp	M1 (Fig 4F)	20	13.53
200bp	M1 (Fig 4F)	20	13.688
200bp	M1 (Fig 4F)	25	13.391
200bp	M1 (Fig 4F)	25	13.267
200bp	M1 (Fig 4F)	25	13.399
200bp	M1 (Fig 4F)	30	13.337
200bp	M1 (Fig 4F)	30	13.347
200bp	M1 (Fig 4F)	30	13.594
200bp	M1 (Fig 4F)	40	13.11
200bp	M1 (Fig 4F)	40	13.334
200bp	M1 (Fig 4F)	40	13.233
200bp	M1 (Fig 4F)	50	13.137
200bp	M1 (Fig 4F)	50	13.269
200bp	M1 (Fig 4F)	50	13.262
500bp	M1 (Fig 4F)	2.5	16.342
500bp	M1 (Fig 4F)	2.5	16.448
500bp	M1 (Fig 4F)	2.5	16.126
500bp	M1 (Fig 4F)	5	14.484
500bp	M1 (Fig 4F)	5	15.029
500bp	M1 (Fig 4F)	5	14.263
500bp	M1 (Fig 4F)	7.5	13.48
500bp	M1 (Fig 4F)	7.5	13.453
500bp	M1 (Fig 4F)	7.5	13.27
500bp	M1 (Fig 4F)	10	12.928
500bp	M1 (Fig 4F)	10	12.896
500bp	M1 (Fig 4F)	10	12.753
500bp	M1 (Fig 4F)	12.5	12.634
500bp	M1 (Fig 4F)	12.5	13.099
500bp	M1 (Fig 4F)	12.5	12.508
500bp	M1 (Fig 4F)	15	12.29
500bp	M1 (Fig 4F)	15	12.445
500bp	M1 (Fig 4F)	15	12.267
500bp	M1 (Fig 4F)	17.5	11.616
500bp	M1 (Fig 4F)	17.5	12.137
500bp	M1 (Fig 4F)	17.5	12.36
500bp	M1 (Fig 4F)	20	12.118
500bp	M1 (Fig 4F)	20	12.086
500bp	M1 (Fig 4F)	20	11.945
500bp	M1 (Fig 4F)	25	12.145
500bp	M1 (Fig 4F)	25	11.966
500bp	M1 (Fig 4F)	25	11.806
500bp	M1 (Fig 4F)	30	12.079
500bp	M1 (Fig 4F)	30	11.819
500bp	M1 (Fig 4F)	30	11.822
500bp	M1 (Fig 4F)	40	11.83
500bp	M1 (Fig 4F)	40	12.054
500bp	M1 (Fig 4F)	40	12.08
500bp	M1 (Fig 4F)	50	11.823
500bp	M1 (Fig 4F)	50	11.791
500bp	M1 (Fig 4F)	50	11.884
1000bp	M1 (Fig 4F)	2.5	19.488
1000bp	M1 (Fig 4F)	2.5	19.455
1000bp	M1 (Fig 4F)	2.5	19.005
1000bp	M1 (Fig 4F)	5	17.716
1000bp	M1 (Fig 4F)	5	17.609
1000bp	M1 (Fig 4F)	5	17.166
1000bp	M1 (Fig 4F)	7.5	16.22
1000bp	M1 (Fig 4F)	7.5	16.156
1000bp	M1 (Fig 4F)	7.5	15.016
1000bp	M1 (Fig 4F)	10	15.559
1000bp	M1 (Fig 4F)	10	15.328
1000bp	M1 (Fig 4F)	10	15.305
1000bp	M1 (Fig 4F)	12.5	15.074
1000bp	M1 (Fig 4F)	12.5	15.021
1000bp	M1 (Fig 4F)	12.5	14.965
1000bp	M1 (Fig 4F)	15	14.781
1000bp	M1 (Fig 4F)	15	14.679
1000bp	M1 (Fig 4F)	15	14.599
1000bp	M1 (Fig 4F)	17.5	14.417
1000bp	M1 (Fig 4F)	17.5	14.364
1000bp	M1 (Fig 4F)	17.5	14.3
1000bp	M1 (Fig 4F)	20	14.56
1000bp	M1 (Fig 4F)	20	14.54
1000bp	M1 (Fig 4F)	20	14.248
1000bp	M1 (Fig 4F)	25	14.131
1000bp	M1 (Fig 4F)	25	13.784
1000bp	M1 (Fig 4F)	25	13.979
1000bp	M1 (Fig 4F)	30	13.951
1000bp	M1 (Fig 4F)	30	14.378
1000bp	M1 (Fig 4F)	30	14.105
1000bp	M1 (Fig 4F)	40	14.042
1000bp	M1 (Fig 4F)	40	14.613
1000bp	M1 (Fig 4F)	40	13.82
1000bp	M1 (Fig 4F)	50	13.941
1000bp	M1 (Fig 4F)	50	14.472
1000bp	M1 (Fig 4F)	50	13.852
1500bp	M1 (Fig 4F)	2.5	17.43
1500bp	M1 (Fig 4F)	2.5	17.597
1500bp	M1 (Fig 4F)	2.5	17.59
1500bp	M1 (Fig 4F)	5	16.113
1500bp	M1 (Fig 4F)	5	16.265
1500bp	M1 (Fig 4F)	5	16.192
1500bp	M1 (Fig 4F)	7.5	14.895
1500bp	M1 (Fig 4F)	7.5	14.996
1500bp	M1 (Fig 4F)	7.5	14.903
1500bp	M1 (Fig 4F)	10	14.032
1500bp	M1 (Fig 4F)	10	14.22
1500bp	M1 (Fig 4F)	10	14.25
1500bp	M1 (Fig 4F)	12.5	13.41
1500bp	M1 (Fig 4F)	12.5	13.765
1500bp	M1 (Fig 4F)	12.5	13.848
1500bp	M1 (Fig 4F)	15	13.197
1500bp	M1 (Fig 4F)	15	13.375
1500bp	M1 (Fig 4F)	15	13.381
1500bp	M1 (Fig 4F)	17.5	13.042
1500bp	M1 (Fig 4F)	17.5	13.132
1500bp	M1 (Fig 4F)	17.5	13.205
1500bp	M1 (Fig 4F)	20	12.897
1500bp	M1 (Fig 4F)	20	12.997
1500bp	M1 (Fig 4F)	20	13.093
1500bp	M1 (Fig 4F)	25	12.991
1500bp	M1 (Fig 4F)	25	12.738
1500bp	M1 (Fig 4F)	25	12.778
1500bp	M1 (Fig 4F)	30	12.687
1500bp	M1 (Fig 4F)	30	12.615
1500bp	M1 (Fig 4F)	30	12.722
1500bp	M1 (Fig 4F)	40	12.463
1500bp	M1 (Fig 4F)	40	12.579
1500bp	M1 (Fig 4F)	40	12.599
1500bp	M1 (Fig 4F)	50	12.473
1500bp	M1 (Fig 4F)	50	12.484
1500bp	M1 (Fig 4F)	50	12.525
2000bp	M1 (Fig 4F)	2.5	18.329
2000bp	M1 (Fig 4F)	2.5	18.391
2000bp	M1 (Fig 4F)	2.5	18.359
2000bp	M1 (Fig 4F)	5	17.504
2000bp	M1 (Fig 4F)	5	17.864
2000bp	M1 (Fig 4F)	5	17.63
2000bp	M1 (Fig 4F)	7.5	16.164
2000bp	M1 (Fig 4F)	7.5	16.476
2000bp	M1 (Fig 4F)	7.5	14.381
2000bp	M1 (Fig 4F)	10	15.203
2000bp	M1 (Fig 4F)	10	15.458
2000bp	M1 (Fig 4F)	10	15.51
2000bp	M1 (Fig 4F)	12.5	14.51
2000bp	M1 (Fig 4F)	12.5	14.92
2000bp	M1 (Fig 4F)	12.5	14.802
2000bp	M1 (Fig 4F)	15	13.977
2000bp	M1 (Fig 4F)	15	14.248
2000bp	M1 (Fig 4F)	15	14.237
2000bp	M1 (Fig 4F)	17.5	13.483
2000bp	M1 (Fig 4F)	17.5	13.804
2000bp	M1 (Fig 4F)	17.5	13.789
2000bp	M1 (Fig 4F)	20	13.431
2000bp	M1 (Fig 4F)	20	13.398
2000bp	M1 (Fig 4F)	20	13.735
2000bp	M1 (Fig 4F)	25	12.946
2000bp	M1 (Fig 4F)	25	12.971
2000bp	M1 (Fig 4F)	25	13.231
2000bp	M1 (Fig 4F)	30	12.778
2000bp	M1 (Fig 4F)	30	12.822
2000bp	M1 (Fig 4F)	30	12.714
2000bp	M1 (Fig 4F)	40	12.58
2000bp	M1 (Fig 4F)	40	12.73
2000bp	M1 (Fig 4F)	40	12.671
2000bp	M1 (Fig 4F)	50	12.474
2000bp	M1 (Fig 4F)	50	12.64
2000bp	M1 (Fig 4F)	50	12.586
control	PM1 (Fig 4G)	2.5	9.071
control	PM1 (Fig 4G)	2.5	10.926
control	PM1 (Fig 4G)	2.5	9.274
control	PM1 (Fig 4G)	5	9.394
control	PM1 (Fig 4G)	5	9.199
control	PM1 (Fig 4G)	5	9.216
control	PM1 (Fig 4G)	7.5	8.994
control	PM1 (Fig 4G)	7.5	9.208
control	PM1 (Fig 4G)	7.5	9.425
control	PM1 (Fig 4G)	10	8.883
control	PM1 (Fig 4G)	10	9.223
control	PM1 (Fig 4G)	10	9.224
control	PM1 (Fig 4G)	12.5	8.948
control	PM1 (Fig 4G)	12.5	9.774
control	PM1 (Fig 4G)	12.5	9.058
control	PM1 (Fig 4G)	15	9.092
control	PM1 (Fig 4G)	15	9.196
control	PM1 (Fig 4G)	15	9.247
control	PM1 (Fig 4G)	17.5	9.088
control	PM1 (Fig 4G)	17.5	9.241
control	PM1 (Fig 4G)	17.5	9.205
control	PM1 (Fig 4G)	20	9.666
control	PM1 (Fig 4G)	20	9.095
control	PM1 (Fig 4G)	20	9.048
control	PM1 (Fig 4G)	25	8.891
control	PM1 (Fig 4G)	25	8.979
control	PM1 (Fig 4G)	25	8.904
control	PM1 (Fig 4G)	30	9.077
control	PM1 (Fig 4G)	30	9.078
control	PM1 (Fig 4G)	30	8.88
control	PM1 (Fig 4G)	40	9.125
control	PM1 (Fig 4G)	40	9.085
control	PM1 (Fig 4G)	40	8.954
control	PM1 (Fig 4G)	50	8.99
control	PM1 (Fig 4G)	50	9.11
control	PM1 (Fig 4G)	50	8.966
200bp	PM1 (Fig 4G)	2.5	16.282
200bp	PM1 (Fig 4G)	2.5	16.862
200bp	PM1 (Fig 4G)	2.5	16.615
200bp	PM1 (Fig 4G)	5	15.13
200bp	PM1 (Fig 4G)	5	15.387
200bp	PM1 (Fig 4G)	5	15.313
200bp	PM1 (Fig 4G)	7.5	14.55
200bp	PM1 (Fig 4G)	7.5	14.886
200bp	PM1 (Fig 4G)	7.5	14.804
200bp	PM1 (Fig 4G)	10	14.326
200bp	PM1 (Fig 4G)	10	14.821
200bp	PM1 (Fig 4G)	10	14.786
200bp	PM1 (Fig 4G)	12.5	13.983
200bp	PM1 (Fig 4G)	12.5	14.299
200bp	PM1 (Fig 4G)	12.5	14.211
200bp	PM1 (Fig 4G)	15	13.967
200bp	PM1 (Fig 4G)	15	14.19
200bp	PM1 (Fig 4G)	15	14.119
200bp	PM1 (Fig 4G)	17.5	13.71
200bp	PM1 (Fig 4G)	17.5	14.313
200bp	PM1 (Fig 4G)	17.5	13.933
200bp	PM1 (Fig 4G)	20	13.559
200bp	PM1 (Fig 4G)	20	13.868
200bp	PM1 (Fig 4G)	20	13.711
200bp	PM1 (Fig 4G)	25	13.573
200bp	PM1 (Fig 4G)	25	13.649
200bp	PM1 (Fig 4G)	25	13.534
200bp	PM1 (Fig 4G)	30	13.278
200bp	PM1 (Fig 4G)	30	13.261
200bp	PM1 (Fig 4G)	30	13.693
200bp	PM1 (Fig 4G)	40	13.126
200bp	PM1 (Fig 4G)	40	13.74
200bp	PM1 (Fig 4G)	40	13.195
200bp	PM1 (Fig 4G)	50	13.169
200bp	PM1 (Fig 4G)	50	13.25
200bp	PM1 (Fig 4G)	50	13.083
500bp	PM1 (Fig 4G)	2.5	16.605
500bp	PM1 (Fig 4G)	2.5	16.495
500bp	PM1 (Fig 4G)	2.5	16.751
500bp	PM1 (Fig 4G)	5	15.33
500bp	PM1 (Fig 4G)	5	15.514
500bp	PM1 (Fig 4G)	5	15.548
500bp	PM1 (Fig 4G)	7.5	14.321
500bp	PM1 (Fig 4G)	7.5	14.317
500bp	PM1 (Fig 4G)	7.5	14.509
500bp	PM1 (Fig 4G)	10	13.699
500bp	PM1 (Fig 4G)	10	14.065
500bp	PM1 (Fig 4G)	10	13.979
500bp	PM1 (Fig 4G)	12.5	12.991
500bp	PM1 (Fig 4G)	12.5	13.062
500bp	PM1 (Fig 4G)	12.5	13.16
500bp	PM1 (Fig 4G)	15	12.895
500bp	PM1 (Fig 4G)	15	12.83
500bp	PM1 (Fig 4G)	15	12.839
500bp	PM1 (Fig 4G)	17.5	12.657
500bp	PM1 (Fig 4G)	17.5	10.815
500bp	PM1 (Fig 4G)	17.5	12.506
500bp	PM1 (Fig 4G)	20	12.466
500bp	PM1 (Fig 4G)	20	12.091
500bp	PM1 (Fig 4G)	20	12.388
500bp	PM1 (Fig 4G)	25	12.202
500bp	PM1 (Fig 4G)	25	11.96
500bp	PM1 (Fig 4G)	25	12.183
500bp	PM1 (Fig 4G)	30	11.985
500bp	PM1 (Fig 4G)	30	11.967
500bp	PM1 (Fig 4G)	30	11.82
500bp	PM1 (Fig 4G)	40	11.9
500bp	PM1 (Fig 4G)	40	11.756
500bp	PM1 (Fig 4G)	40	12.072
500bp	PM1 (Fig 4G)	50	11.846
500bp	PM1 (Fig 4G)	50	11.313
500bp	PM1 (Fig 4G)	50	11.594
1000bp	PM1 (Fig 4G)	2.5	19.565
1000bp	PM1 (Fig 4G)	2.5	19.342
1000bp	PM1 (Fig 4G)	2.5	19.029
1000bp	PM1 (Fig 4G)	5	18.648
1000bp	PM1 (Fig 4G)	5	18.131
1000bp	PM1 (Fig 4G)	5	18.132
1000bp	PM1 (Fig 4G)	7.5	17.362
1000bp	PM1 (Fig 4G)	7.5	17.073
1000bp	PM1 (Fig 4G)	7.5	17.402
1000bp	PM1 (Fig 4G)	10	16.581
1000bp	PM1 (Fig 4G)	10	16.585
1000bp	PM1 (Fig 4G)	10	16.704
1000bp	PM1 (Fig 4G)	12.5	16.094
1000bp	PM1 (Fig 4G)	12.5	15.737
1000bp	PM1 (Fig 4G)	12.5	16.123
1000bp	PM1 (Fig 4G)	15	16.025
1000bp	PM1 (Fig 4G)	15	15.863
1000bp	PM1 (Fig 4G)	15	16.005
1000bp	PM1 (Fig 4G)	17.5	15.662
1000bp	PM1 (Fig 4G)	17.5	15.62
1000bp	PM1 (Fig 4G)	17.5	15.689
1000bp	PM1 (Fig 4G)	20	14.945
1000bp	PM1 (Fig 4G)	20	15.192
1000bp	PM1 (Fig 4G)	20	15.504
1000bp	PM1 (Fig 4G)	25	14.24
1000bp	PM1 (Fig 4G)	25	15.047
1000bp	PM1 (Fig 4G)	25	14.643
1000bp	PM1 (Fig 4G)	30	14.735
1000bp	PM1 (Fig 4G)	30	14.667
1000bp	PM1 (Fig 4G)	30	14.453
1000bp	PM1 (Fig 4G)	40	14.317
1000bp	PM1 (Fig 4G)	40	14.629
1000bp	PM1 (Fig 4G)	40	14.07
1000bp	PM1 (Fig 4G)	50	14.748
1000bp	PM1 (Fig 4G)	50	14.732
1000bp	PM1 (Fig 4G)	50	13.949
1500bp	PM1 (Fig 4G)	2.5	17.402
1500bp	PM1 (Fig 4G)	2.5	17.701
1500bp	PM1 (Fig 4G)	2.5	17.701
1500bp	PM1 (Fig 4G)	5	16.979
1500bp	PM1 (Fig 4G)	5	17.115
1500bp	PM1 (Fig 4G)	5	17.193
1500bp	PM1 (Fig 4G)	7.5	16.465
1500bp	PM1 (Fig 4G)	7.5	16.621
1500bp	PM1 (Fig 4G)	7.5	16.681
1500bp	PM1 (Fig 4G)	10	15.977
1500bp	PM1 (Fig 4G)	10	16.181
1500bp	PM1 (Fig 4G)	10	16.245
1500bp	PM1 (Fig 4G)	12.5	15.382
1500bp	PM1 (Fig 4G)	12.5	15.653
1500bp	PM1 (Fig 4G)	12.5	15.75
1500bp	PM1 (Fig 4G)	15	15.288
1500bp	PM1 (Fig 4G)	15	15.451
1500bp	PM1 (Fig 4G)	15	15.539
1500bp	PM1 (Fig 4G)	17.5	15.041
1500bp	PM1 (Fig 4G)	17.5	15.166
1500bp	PM1 (Fig 4G)	17.5	15.19
1500bp	PM1 (Fig 4G)	20	14.806
1500bp	PM1 (Fig 4G)	20	14.836
1500bp	PM1 (Fig 4G)	20	14.841
1500bp	PM1 (Fig 4G)	25	14.265
1500bp	PM1 (Fig 4G)	25	14.313
1500bp	PM1 (Fig 4G)	25	14.403
1500bp	PM1 (Fig 4G)	30	13.841
1500bp	PM1 (Fig 4G)	30	13.945
1500bp	PM1 (Fig 4G)	30	13.996
1500bp	PM1 (Fig 4G)	40	13.37
1500bp	PM1 (Fig 4G)	40	13.578
1500bp	PM1 (Fig 4G)	40	13.578
1500bp	PM1 (Fig 4G)	50	13.157
1500bp	PM1 (Fig 4G)	50	13.232
1500bp	PM1 (Fig 4G)	50	13.263
2000bp	PM1 (Fig 4G)	2.5	17.566
2000bp	PM1 (Fig 4G)	2.5	18.585
2000bp	PM1 (Fig 4G)	2.5	17.991
2000bp	PM1 (Fig 4G)	5	17.665
2000bp	PM1 (Fig 4G)	5	18.417
2000bp	PM1 (Fig 4G)	5	18.06
2000bp	PM1 (Fig 4G)	7.5	16.993
2000bp	PM1 (Fig 4G)	7.5	18.005
2000bp	PM1 (Fig 4G)	7.5	17.86
2000bp	PM1 (Fig 4G)	10	16.636
2000bp	PM1 (Fig 4G)	10	17.932
2000bp	PM1 (Fig 4G)	10	17.558
2000bp	PM1 (Fig 4G)	12.5	16.427
2000bp	PM1 (Fig 4G)	12.5	16.908
2000bp	PM1 (Fig 4G)	12.5	17.011
2000bp	PM1 (Fig 4G)	15	16.233
2000bp	PM1 (Fig 4G)	15	17.114
2000bp	PM1 (Fig 4G)	15	16.944
2000bp	PM1 (Fig 4G)	17.5	15.877
2000bp	PM1 (Fig 4G)	17.5	16.884
2000bp	PM1 (Fig 4G)	17.5	16.566
2000bp	PM1 (Fig 4G)	20	15.305
2000bp	PM1 (Fig 4G)	20	16.061
2000bp	PM1 (Fig 4G)	20	15.788
2000bp	PM1 (Fig 4G)	25	14.969
2000bp	PM1 (Fig 4G)	25	15.563
2000bp	PM1 (Fig 4G)	25	15.068
2000bp	PM1 (Fig 4G)	30	14.562
2000bp	PM1 (Fig 4G)	30	15.023
2000bp	PM1 (Fig 4G)	30	14.62
2000bp	PM1 (Fig 4G)	40	13.977
2000bp	PM1 (Fig 4G)	40	14.469
2000bp	PM1 (Fig 4G)	40	14.053
2000bp	PM1 (Fig 4G)	50	13.604
2000bp	PM1 (Fig 4G)	50	13.96
2000bp	PM1 (Fig 4G)	50	13.665
