# Supplementary material for: Rad53 checkpoint kinase regulation of DNA replication fork rate via Mrc1 phosphorylation
Source: eLife. 2021 Aug 13;10:e69726. doi: 10.7554/eLife.69726 (PMC8387023; doi:10.7554/eLife.69726)
Supplement: Figure 7—source data 2. [file elife-69726-fig7-data2.xlsx]

## Sheet: Sheet1
	raw data (triplicates)					averaged and normalised
	strain	MMS	time	colony count		strain	time	% viability	std error (n=3)
	yAWM337	no	7	302		yAWM337	7	101.03	4.25192
	yAWM337	no	7	293		yAWM337	25	92.1158	1.76565
	yAWM337	no	7	279		yAWM337	45	91.1614	1.01222
	yAWM337	yes	7	280		yAWM337	65	76.8145	3.49204
	yAWM337	yes	7	284		yAWM292	7	95.6845	1.86458
	yAWM337	yes	7	319		yAWM292	25	84.1379	2.60339
	yAWM337	no	25	347		yAWM292	45	101.623	0.975062
	yAWM337	no	25	306		yAWM292	65	106.891	5.95062
	yAWM337	no	25	349		yAWM338	7	101.905	5.03953
	yAWM337	yes	25	315		yAWM338	25	48.8571	9.74784
	yAWM337	yes	25	312		yAWM338	45	11.6608	1.06007
	yAWM337	yes	25	296		yAWM338	65	6.12903	1.79605
	yAWM337	no	45	325		yAWM293	7	102.965	3.44128
	yAWM337	no	45	306		yAWM293	25	84.1837	2.68767
	yAWM337	no	45	342		yAWM293	45	34.8485	1.57702
	yAWM337	yes	45	294		yAWM293	65	11.3744	2.4966
	yAWM337	yes	45	302
	yAWM337	yes	45	291
	yAWM337	no	65	323
	yAWM337	no	65	344
	yAWM337	no	65	325
	yAWM337	yes	65	254
	yAWM337	yes	65	234
	yAWM337	yes	65	274
	yAWM292	no	7	224
	yAWM292	no	7	251
	yAWM292	no	7	197
	yAWM292	yes	7	219
	yAWM292	yes	7	206
	yAWM292	yes	7	218
	yAWM292	no	25	318
	yAWM292	no	25	265
	yAWM292	no	25	287
	yAWM292	yes	25	235
	yAWM292	yes	25	259
	yAWM292	yes	25	238
	yAWM292	no	45	261
	yAWM292	no	45	274
	yAWM292	no	45	266
	yAWM292	yes	45	276
	yAWM292	yes	45	271
	yAWM292	yes	45	267
	yAWM292	no	65	241
	yAWM292	no	65	214
	yAWM292	no	65	227
	yAWM292	yes	65	231
	yAWM292	yes	65	270
	yAWM292	yes	65	228
	yAWM338	no	7	100
	yAWM338	no	7	112
	yAWM338	no	7	103
	yAWM338	yes	7	115
	yAWM338	yes	7	109
	yAWM338	yes	7	97
	yAWM338	no	25	135
	yAWM338	no	25	105
	yAWM338	no	25	110
	yAWM338	yes	25	79
	yAWM338	yes	25	41
	yAWM338	yes	25	51
	yAWM338	no	45	89
	yAWM338	no	45	103
	yAWM338	no	45	91
	yAWM338	yes	45	12
	yAWM338	yes	45	9
	yAWM338	yes	45	12
	yAWM338	no	65	91
	yAWM338	no	65	109
	yAWM338	no	65	110
	yAWM338	yes	65	5
	yAWM338	yes	65	4
	yAWM338	yes	65	10
	yAWM293	no	7	132
	yAWM293	no	7	126
	yAWM293	no	7	113
	yAWM293	yes	7	119
	yAWM293	yes	7	133
	yAWM293	yes	7	130
	yAWM293	no	25	131
	yAWM293	no	25	120
	yAWM293	no	25	141
	yAWM293	yes	25	106
	yAWM293	yes	25	117
	yAWM293	yes	25	107
	yAWM293	no	45	138
	yAWM293	no	45	135
	yAWM293	no	45	123
	yAWM293	yes	45	47
	yAWM293	yes	45	49
	yAWM293	yes	45	42
	yAWM293	no	65	137
	yAWM293	no	65	136
	yAWM293	no	65	149
	yAWM293	yes	65	13
	yAWM293	yes	65	23
	yAWM293	yes	65	12
